# Supplementary material for: A Novel Network Pharmacology Strategy to Decode Metabolic Biomarkers and Targets Interactions for Depression
Source: PubMed Central journal article supplement (PMC7373779; doi:10.3389/fpsyt.2020.00667), 2020-07-15
Supplement: DataSheet_1.pdf [file DataSheet_1.pdf]

**Supplementary Table S1. Targets of nervous system****UniProt ID UniProt Name**

|        |                                                                       |
|--------|-----------------------------------------------------------------------|
| O00255 | Menin 1                                                               |
| O00555 | Calcium Voltage-Gated Channel Subunit Alpha1 A                        |
| O14497 | AT-Rich Interaction Domain 1A                                         |
| O15146 | Muscle Associated Receptor Tyrosine Kinase                            |
| O43612 | Hypocretin Neuropeptide Precursor                                     |
| O60260 | Parkin RBR E3 Ubiquitin Protein Ligase                                |
| O60733 | Phospholipase A2 Group VI                                             |
| O75665 | OFD1, Centriole And Centriolar Satellite Protein                      |
| O95409 | Zic Family Member 2                                                   |
| P00414 | Mitochondrially Encoded Cytochrome C Oxidase III                      |
| P00441 | Superoxide Dismutase 1                                                |
| P00450 | Ceruloplasmin                                                         |
| P01112 | HRas Proto-Oncogene, GTPase                                           |
| P01116 | KRAS Proto-Oncogene, GTPase                                           |
| P01127 | Platelet Derived Growth Factor Subunit B                              |
| P01138 | Nerve Growth Factor                                                   |
| P01189 | Proopiomelanocortin                                                   |
| P01213 | Prodynorphin                                                          |
| P01303 | Neuropeptide Y                                                        |
| P01308 | Insulin                                                               |
| P01375 | Tumor Necrosis Factor                                                 |
| P01579 | Interferon Gamma                                                      |
| P01584 | Interleukin 1 Beta                                                    |
| P01911 | Major Histocompatibility Complex, Class II, DR Beta 1                 |
| P01920 | Major Histocompatibility Complex, Class II, DQ Beta 1                 |
| P02649 | Apolipoprotein E                                                      |
| P02768 | Albumin                                                               |
| P03886 | Mitochondrially Encoded NADH:Ubiquinone Oxidoreductase Core Subunit 1 |
| P03915 | Mitochondrially Encoded NADH:Ubiquinone Oxidoreductase Core Subunit 5 |
| P03923 | Mitochondrially Encoded NADH:Ubiquinone Oxidoreductase Core Subunit 6 |
| P04062 | Glucosylceramidase Beta                                               |
| P04156 | Prion Protein                                                         |
| P04271 | S100 Calcium Binding Protein B                                        |
| P04637 | Tumor Protein P53                                                     |
| P05019 | Insulin Like Growth Factor 1                                          |
| P05067 | Amyloid Beta Precursor Protein                                        |
| P05231 | Interleukin 6                                                         |
| P06280 | Galactosidase Alpha                                                   |
| P06850 | Corticotropin Releasing Hormone                                       |
| P06881 | Calcitonin Related Polypeptide Alpha                                  |
| P07101 | Tyrosine Hydroxylase                                                  |
| P07949 | Ret Proto-Oncogene                                                    |
| P08908 | 5-Hydroxytryptamine Receptor 1A                                       |
| P09172 | Dopamine Beta-Hydroxylase                                             |
| P09619 | Platelet Derived Growth Factor Receptor Beta                          |
| P10071 | GLI Family Zinc Finger 3                                              |
| P10636 | Microtubule Associated Protein Tau                                    |
| P11166 | Solute Carrier Family 2 Member 1                                      |
| P11362 | Fibroblast Growth Factor Receptor 1                                   |
| P12821 | Angiotensin I Converting Enzyme                                       |
| P13637 | ATPase Na <sup>+</sup> /K <sup>+</sup> Transporting Subunit Alpha 3   |
| P14136 | Glial Fibrillary Acidic Protein                                       |
| P14416 | Dopamine Receptor D2                                                  |
| P15056 | B-Raf Proto-Oncogene, Serine/Threonine Kinase                         |
| P15104 | Glutamate-Ammonia Ligase                                              |
| P15289 | Arylsulfatase A                                                       |
| P15884 | Transcription Factor 4                                                |
| P16278 | Galactosidase Beta 1                                                  |
| P20226 | TATA-Box Binding Protein                                              |

P20700 Lamin B1  
P20783 Neurotrophin 3  
P21333 Filamin A  
P21359 Neurofibromin 1  
P21397 Monoamine Oxidase A  
P21917 Dopamine Receptor D4  
P21964 Catechol-O-Methyltransferase  
P22301 Interleukin 10  
P22466 Galanin And GMAP Prepropeptide  
P22607 Fibroblast Growth Factor Receptor 3  
P23560 Brain Derived Neurotrophic Factor  
P23760 Paired Box 3  
P23975 Solute Carrier Family 6 Member 2  
P26358 DNA Methyltransferase 1  
P26367 Paired Box 6  
P27338 Monoamine Oxidase B  
P28329 Choline O-Acetyltransferase  
P28799 Granulin Precursor  
P29475 Nitric Oxide Synthase 1  
P29992 G Protein Subunit Alpha 11  
P30793 GTP Cyclohydrolase 1  
P31645 Solute Carrier Family 6 Member 4  
P31749 AKT Serine/Threonine Kinase 1  
P32243 Orthodenticle Homeobox 2  
P35520 Cystathionine-Beta-Synthase  
P35637 FUS RNA Binding Protein  
P35716 SRY-Box 11  
P37840 Synuclein Alpha  
P39905 Glial Cell Derived Neurotrophic Factor  
P41159 Leptin  
P42336 Phosphatidylinositol-4,5-Bisphosphate 3-Kinase Catalytic Subunit Alpha  
P42345 Mechanistic Target Of Rapamycin Kinase  
P42858 Huntingtin  
P42898 Methylene tetrahydrofolate Reductase  
P43004 Solute Carrier Family 1 Member 2  
P43354 Nuclear Receptor Subfamily 4 Group A Member 2  
P48436 SRY-Box 9  
P49768 Presenilin 1  
P51532 SWI/SNF Related, Matrix Associated, Actin Dependent Regulator Of Chromatin, Subfamily A, Me  
P51608 Methyl-CpG Binding Protein 2  
P51659 Hydroxysteroid 17-Beta Dehydrogenase 4  
P53667 LIM Domain Kinase 1  
P54098 DNA Polymerase Gamma, Catalytic Subunit  
P55072 Valosin Containing Protein  
P55075 Fibroblast Growth Factor 8  
P55316 Forkhead Box G1  
P60484 Phosphatase And Tensin Homolog  
P61278 Somatostatin  
P78509 Reelin  
P98164 LDL Receptor Related Protein 2  
Q01959 Solute Carrier Family 6 Member 3  
Q05940 Solute Carrier Family 18 Member A2  
Q06413 Myocyte Enhancer Factor 2C  
Q06787 Fragile X Mental Retardation 1  
Q12824 SWI/SNF Related, Matrix Associated, Actin Dependent Regulator Of Chromatin, Subfamily B, Me  
Q12879 Glutamate Ionotropic Receptor NMDA Type Subunit 2A  
Q13148 TAR DNA Binding Protein  
Q13224 Glutamate Ionotropic Receptor NMDA Type Subunit 2B  
Q13255 Glutamate Metabotropic Receptor 1  
Q13501 Sequestosome 1  
Q13635 Patched 1

Q13702 Receptor Associated Protein Of The Synapse  
Q14203 Dynactin Subunit 1  
Q15067 Acyl-CoA Oxidase 1  
Q15303 Erb-B2 Receptor Tyrosine Kinase 4  
Q15465 Sonic Hedgehog  
Q16620 Neurotrophic Receptor Tyrosine Kinase 2  
Q5JTZ9 Alanyl-TRNA Synthetase 2, Mitochondrial  
Q5S007 Leucine Rich Repeat Kinase 2  
Q8NER1 Transient Receptor Potential Cation Channel Subfamily V Member 1  
Q8NFD5 AT-Rich Interaction Domain 1B  
Q969G3 SWI/SNF Related, Matrix Associated, Actin Dependent Regulator Of Chromatin, Subfamily E, Me  
Q96CV9 Optineurin  
Q96LT7 Chromosome 9 Open Reading Frame 72  
Q96RR1 Twinkle MtDNA Helicase  
Q99259 Glutamate Decarboxylase 1  
Q99497 Parkinsonism Associated Deglycase  
Q99700 Ataxin 2  
Q9BYW2 SET Domain Containing 2  
Q9BZ23 Pantothenate Kinase 2  
Q9HBA0 Transient Receptor Potential Cation Channel Subfamily V Member 4  
Q9NQC3 Reticulon 4  
Q9NRA2 Solute Carrier Family 17 Member 5  
Q9NSK7 Chromosome 19 Open Reading Frame 12  
Q9NWW5 CLN6, Transmembrane ER Protein  
Q9P0N5 Transmembrane Protein 216  
Q9UBK2 PPARG Coactivator 1 Alpha  
Q9UBP0 Spastin  
Q9UHD2 TANK Binding Kinase 1  
Q9UM47 Notch 3  
Q9UQN3 Charged Multivesicular Body Protein 2B  
Q9Y243 AKT Serine/Threonine Kinase 3  
Q9Y276 BCS1 Homolog, Ubiquinol-Cytochrome C Reductase Complex Chaperone  
Q9Y617 Phosphoserine Aminotransferase 1  
Q9Y6H5 Synuclein Alpha Interacting Protein  
Q9Y6K9 Inhibitor Of Nuclear Factor Kappa B Kinase Subunit Gamma

**Supplementary Table S2. Targets of immune system****UniProt ID UniProt name**

|        |                                                                        |
|--------|------------------------------------------------------------------------|
| P02787 | Transferrin                                                            |
| P07202 | Thyroid Peroxidase                                                     |
| P98160 | Heparan Sulfate Proteoglycan 2                                         |
| Q06124 | Protein Tyrosine Phosphatase, Non-Receptor Type 11                     |
| Q6UXH8 | Collagen And Calcium Binding EGF Domains 1                             |
| O15146 | Muscle Associated Receptor Tyrosine Kinase                             |
| O43435 | T-Box 1                                                                |
| O60934 | Nibrin                                                                 |
| P00738 | Haptoglobin                                                            |
| P01112 | HRas Proto-Oncogene, GTPase                                            |
| P01116 | KRAS Proto-Oncogene, GTPase                                            |
| P01189 | Proopiomelanocortin                                                    |
| P01236 | Prolactin                                                              |
| P01308 | Insulin                                                                |
| P01375 | Tumor Necrosis Factor                                                  |
| P01562 | Interferon Alpha 1                                                     |
| P01579 | Interferon Gamma                                                       |
| P01584 | Interleukin 1 Beta                                                     |
| P01589 | Interleukin 2 Receptor Subunit Alpha                                   |
| P01911 | Major Histocompatibility Complex, Class II, DR Beta 1                  |
| P01920 | Major Histocompatibility Complex, Class II, DQ Beta 1                  |
| P02649 | Apolipoprotein E                                                       |
| P02741 | C-Reactive Protein                                                     |
| P02768 | Albumin                                                                |
| P04049 | Raf-1 Proto-Oncogene, Serine/Threonine Kinase                          |
| P04062 | Glucosylceramidase Beta                                                |
| P04150 | Nuclear Receptor Subfamily 3 Group C Member 1                          |
| P04637 | Tumor Protein P53                                                      |
| P05231 | Interleukin 6                                                          |
| P10145 | C-X-C Motif Chemokine Ligand 8                                         |
| P11274 | BCR, RhoGEF And GTPase Activating Protein                              |
| P14902 | Indoleamine 2,3-Dioxygenase 1                                          |
| P15056 | B-Raf Proto-Oncogene, Serine/Threonine Kinase                          |
| P15976 | GATA Binding Protein 1                                                 |
| P22301 | Interleukin 10                                                         |
| P22607 | Fibroblast Growth Factor Receptor 3                                    |
| P23771 | GATA Binding Protein 3                                                 |
| P27986 | Phosphoinositide-3-Kinase Regulatory Subunit 1                         |
| P28482 | Mitogen-Activated Protein Kinase 1                                     |
| P31749 | AKT Serine/Threonine Kinase 1                                          |
| P40200 | CD96 Molecule                                                          |
| P41159 | Leptin                                                                 |
| P42336 | Phosphatidylinositol-4,5-Bisphosphate 3-Kinase Catalytic Subunit Alpha |
| P42345 | Mechanistic Target Of Rapamycin Kinase                                 |
| P49913 | Cathelicidin Antimicrobial Peptide                                     |
| P49917 | DNA Ligase 4                                                           |
| P60484 | Phosphatase And Tensin Homolog                                         |
| P60568 | Interleukin 2                                                          |
| P62834 | RAP1A, Member Of RAS Oncogene Family                                   |
| P68871 | Hemoglobin Subunit Beta                                                |
| Q13936 | Calcium Voltage-Gated Channel Subunit Alpha1 C                         |
| Q14739 | Lamin B Receptor                                                       |
| Q99572 | Purinergic Receptor P2X 7                                              |
| Q9NRZ9 | Helicase, Lymphoid Specific                                            |
| Q9NZC2 | Triggering Receptor Expressed On Myeloid Cells 2                       |
| Q9P2D1 | Chromodomain Helicase DNA Binding Protein 7                            |
| Q9UHD2 | TANK Binding Kinase 1                                                  |
| Q9Y2R2 | Protein Tyrosine Phosphatase, Non-Receptor Type 22                     |
| Q9Y6K9 | Inhibitor Of Nuclear Factor Kappa B Kinase Subunit Gamma               |

**Supplementary Table S3. Targets of endocrine system****UniProt ID UniProt name**

|        |                                                               |
|--------|---------------------------------------------------------------|
| O00170 | Aryl Hydrocarbon Receptor Interacting Protein                 |
| O00192 | ARVCF, Delta Catenin Family Member                            |
| O00230 | Cortistatin                                                   |
| O00255 | Menin 1                                                       |
| O14497 | AT-Rich Interaction Domain 1A                                 |
| O14662 | Syntaxin 16                                                   |
| O43435 | T-Box 1                                                       |
| O43933 | Peroxisomal Biogenesis Factor 1                               |
| O75360 | PROP Paired-Like Homeobox 1                                   |
| O76024 | Wolframin ER Transmembrane Glycoprotein                       |
| O94972 | Tripartite Motif Containing 37                                |
| P01112 | HRas Proto-Oncogene, GTPase                                   |
| P01116 | KRAS Proto-Oncogene, GTPase                                   |
| P01138 | Nerve Growth Factor                                           |
| P01148 | Gonadotropin Releasing Hormone 1                              |
| P01185 | Arginine Vasopressin                                          |
| P01189 | Proopiomelanocortin                                           |
| P01222 | Thyroid Stimulating Hormone Beta                              |
| P01236 | Prolactin                                                     |
| P01241 | Growth Hormone 1                                              |
| P01270 | Parathyroid Hormone                                           |
| P01303 | Neuropeptide Y                                                |
| P01308 | Insulin                                                       |
| P01375 | Tumor Necrosis Factor                                         |
| P01579 | Interferon Gamma                                              |
| P01584 | Interleukin 1 Beta                                            |
| P01589 | Interleukin 2 Receptor Subunit Alpha                          |
| P01911 | Major Histocompatibility Complex, Class II, DR Beta 1         |
| P01920 | Major Histocompatibility Complex, Class II, DQ Beta 1         |
| P02741 | C-Reactive Protein                                            |
| P02768 | Albumin                                                       |
| P02787 | Transferrin                                                   |
| P03372 | Estrogen Receptor 1                                           |
| P04049 | Raf-1 Proto-Oncogene, Serine/Threonine Kinase                 |
| P04150 | Nuclear Receptor Subfamily 3 Group C Member 1                 |
| P04278 | Sex Hormone Binding Globulin                                  |
| P04637 | Tumor Protein P53                                             |
| P05019 | Insulin Like Growth Factor 1                                  |
| P05231 | Interleukin 6                                                 |
| P06307 | Cholecystokinin                                               |
| P06850 | Corticotropin Releasing Hormone                               |
| P06881 | Calcitonin Related Polypeptide Alpha                          |
| P07101 | Tyrosine Hydroxylase                                          |
| P07202 | Thyroid Peroxidase                                            |
| P07949 | Ret Proto-Oncogene                                            |
| P08069 | Insulin Like Growth Factor 1 Receptor                         |
| P08397 | Hydroxymethylbilane Synthase                                  |
| P08833 | Insulin Like Growth Factor Binding Protein 1                  |
| P09619 | Platelet Derived Growth Factor Receptor Beta                  |
| P10071 | GLI Family Zinc Finger 3                                      |
| P10082 | Peptide YY                                                    |
| P10145 | C-X-C Motif Chemokine Ligand 8                                |
| P10644 | Protein Kinase CAMP-Dependent Type I Regulatory Subunit Alpha |
| P10912 | Growth Hormone Receptor                                       |
| P11166 | Solute Carrier Family 2 Member 1                              |
| P11362 | Fibroblast Growth Factor Receptor 1                           |
| P12821 | Angiotensin I Converting Enzyme                               |
| P14136 | Glial Fibrillary Acidic Protein                               |
| P14416 | Dopamine Receptor D2                                          |

P15056 B-Raf Proto-Oncogene, Serine/Threonine Kinase  
P16220 CAMP Responsive Element Binding Protein 1  
P16435 Cytochrome P450 Oxidoreductase  
P17302 Gap Junction Protein Alpha 1  
P17612 Protein Kinase CAMP-Activated Catalytic Subunit Alpha  
P20396 Thyrotropin Releasing Hormone  
P21359 Neurofibromin 1  
P21802 Fibroblast Growth Factor Receptor 2  
P21964 Catechol-O-Methyltransferase  
P22466 Galanin And GMAP Prepropeptide  
P23352 Anosmin 1  
P23771 GATA Binding Protein 3  
P26367 Paired Box 6  
P27361 Mitogen-Activated Protein Kinase 3  
P27487 Dipeptidyl Peptidase 4  
P27986 Phosphoinositide-3-Kinase Regulatory Subunit 1  
P28069 POU Class 1 Homeobox 1  
P28482 Mitogen-Activated Protein Kinase 1  
P30968 Gonadotropin Releasing Hormone Receptor  
P31749 AKT Serine/Threonine Kinase 1  
P36551 Coproporphyrinogen Oxidase  
P39905 Glial Cell Derived Neurotrophic Factor  
P41159 Leptin  
P41180 Calcium Sensing Receptor  
P42336 Phosphatidylinositol-4,5-Bisphosphate 3-Kinase Catalytic Subunit Alpha  
P42345 Mechanistic Target Of Rapamycin Kinase  
P42898 Methylenetetrahydrofolate Reductase  
P48436 SRY-Box 9  
P51532 SWI/SNF Related, Matrix Associated, Actin Dependent Regulator Of Chromatin, Subfam  
P51654 Glypican 3  
P51659 Hydroxysteroid 17-Beta Dehydrogenase 4  
P54098 DNA Polymerase Gamma, Catalytic Subunit  
P54198 Histone Cell Cycle Regulator  
P55075 Fibroblast Growth Factor 8  
P60484 Phosphatase And Tensin Homolog  
P60568 Interleukin 2  
P61278 Somatostatin  
P63092 GNAS Complex Locus  
P78504 Jagged 1  
Q02750 Mitogen-Activated Protein Kinase Kinase 1  
Q03431 Parathyroid Hormone 1 Receptor  
Q06124 Protein Tyrosine Phosphatase, Non-Receptor Type 11  
Q06787 Fragile X Mental Retardation 1  
Q08499 Phosphodiesterase 4D  
Q13635 Patched 1  
Q14739 Lamin B Receptor  
Q14999 Cullin 7  
Q15465 Sonic Hedgehog  
Q15652 Jumonji Domain Containing 1C  
Q15726 KiSS-1 Metastasis Suppressor  
Q30201 Hemochromatosis  
Q7LG56 Ribonucleotide Reductase Regulatory TP53 Inducible Subunit M2B  
Q8NEA6 GLIS Family Zinc Finger 3  
Q8NFD5 AT-Rich Interaction Domain 1B  
Q8NFI6 Prokineticin Receptor 2  
Q969F8 KISS1 Receptor  
Q96L73 Nuclear Receptor Binding SET Domain Protein 1  
Q96RR1 Twinkle MtDNA Helicase  
Q99259 Glutamate Decarboxylase 1  
Q9H251 Cadherin Related 23  
Q9H3D4 Tumor Protein P63

|        |                                                    |
|--------|----------------------------------------------------|
| Q9HC23 | Prokineticin 2                                     |
| Q9HCR9 | Phosphodiesterase 11A                              |
| Q9P2D1 | Chromodomain Helicase DNA Binding Protein 7        |
| Q9UBU3 | Ghrelin And Obestatin Prepropeptide                |
| Q9Y2R2 | Protein Tyrosine Phosphatase, Non-Receptor Type 22 |

**Supplementary Table S4. The information of enzymes for metabonomic biomarkers**

| UniProt Gene ID | Kegg Gene Name   | Gene                                                | Organism | Status               | Function             |                                       |
|-----------------|------------------|-----------------------------------------------------|----------|----------------------|----------------------|---------------------------------------|
| A5PLL0          | 1375 has1375     | CPT1B protein                                       | CPT1B    | Homo sapiens (Human) | Unreviewed(TrEMBL)   | Acyltransferase                       |
| A6NH11          |                  | Glycolipid transfer protein domain-containing prote | GLTPD2   | Homo sapiens (Human) | Reviewed(Swiss-Prot) | Intermembrane lipid transfer activity |
| A8YXX4          | 2752 has2752     | Glutamine synthetase                                | PIG59    | Homo sapiens (Human) | Unreviewed(TrEMBL)   | Ligase                                |
| B5MDU3          |                  | Pleckstrin homology domain-containing family A n    | PLEKHA8  | Homo sapiens (Human) | Unreviewed(TrEMBL)   | Intermembrane lipid transfer activity |
| O00154          | 11332 has11332   | Cytosolic acyl coenzyme A thioester hydrolase       | ACOT7    | Homo sapiens (Human) | Reviewed(Swiss-Prot) | Hydrolase, Serine esterase            |
| O00748          | 8824 has8824     | Cocaine esterase                                    | CES2     | Homo sapiens (Human) | Reviewed(Swiss-Prot) | Hydrolase, Serine esterase            |
| O14734          | 10005 has10005   | Acyl-coenzyme A thioesterase 8                      | ACOT8    | Homo sapiens (Human) | Reviewed(Swiss-Prot) | Hydrolase, Serine esterase            |
| O14939          | 5338 has5338     | Phospholipase D2                                    | PLD2     | Homo sapiens (Human) | Reviewed(Swiss-Prot) | Hydrolase                             |
| O15067          | 5198 has5198     | Phosphoribosylformylglycinamidine synthase          | PFAS     | Homo sapiens (Human) | Reviewed(Swiss-Prot) | Ligase                                |
| O15245          |                  | Solute carrier family 22 member 1                   | SLC22A1  | Homo sapiens (Human) | Reviewed(Swiss-Prot) | Acetylcholine transmembrane transp    |
| O15382          | 587 has587       | Branched-chain-amino-acid aminotransferase, mito    | BCAT2    | Homo sapiens (Human) | Reviewed(Swiss-Prot) | Aminotransferase, Transferase         |
| O15496          | 8399 has8399     | Group 10 secretory phospholipase A2                 | PLA2G10  | Homo sapiens (Human) | Reviewed(Swiss-Prot) | Hydrolase                             |
| O43280          | 11181 has11181   | Trehalase                                           | TREH     | Homo sapiens (Human) | Reviewed(Swiss-Prot) | Glycosidase, Hydrolase                |
| O43292          | 8733 has8733     | Glycosylphosphatidylinositol anchor attachment 1 r  | GPAA1    | Homo sapiens (Human) | Reviewed(Swiss-Prot) | Tubulin binding                       |
| O43451          | 8972 has8972     | Maltase-glucoamylase, intestinal                    | MGAM     | Homo sapiens (Human) | Reviewed(Swiss-Prot) | Glycosidase, Hydrolase, Multifunctio  |
| O43548          | 9333 has9333     | Protein-glutamine gamma-glutamyltransferase 5       | TGM5     | Homo sapiens (Human) | Reviewed(Swiss-Prot) | Acyltransferase, Transferase          |
| O43716          | 283459 has283459 | Glutamyl-tRNA(Gln) amidotransferase subunit C, r    | GATC     | Homo sapiens (Human) | Reviewed(Swiss-Prot) | Ligase                                |
| O60391          | 116444 has116444 | Glutamate receptor ionotropic, NMDA 3B              | GRIN3B   | Homo sapiens (Human) | Reviewed(Swiss-Prot) | Ion channel, Ligand-gated ion chann   |
| O60733          | 8398 has8398     | 85/88 kDa calcium-independent phospholipase A2      | PLA2G6   | Homo sapiens (Human) | Reviewed(Swiss-Prot) | Calmodulin-binding, Hydrolase         |
| O60909          | 8704 has8704     | Beta-1,4-galactosyltransferase 2                    | B4GALT2  | Homo sapiens (Human) | Reviewed(Swiss-Prot) | Glycosyltransferase, Transferase      |
| O75311          | 8001 has8001     | Glycine receptor subunit alpha-3                    | GLRA3    | Homo sapiens (Human) | Reviewed(Swiss-Prot) | Chloride channel, Ion channel, Ligan  |
| O75390          | 1431 has1431     | Citrate synthase, mitochondrial                     | CS       | Homo sapiens (Human) | Reviewed(Swiss-Prot) |                                       |
| O75594          | 8993 has8993     | Peptidoglycan recognition protein 1                 | PGLYRP1  | Homo sapiens (Human) | Reviewed(Swiss-Prot) | Antibiotic, Antimicrobial             |
| O75600          | 23464 has23464   | 2-amino-3-ketobutyrate coenzyme A ligase, mitoch    | GCAT     | Homo sapiens (Human) | Reviewed(Swiss-Prot) | Acyltransferase, Transferase          |
| O75608          | 10434 has10434   | Acyl-protein thioesterase 1                         | LYPLA1   | Homo sapiens (Human) | Reviewed(Swiss-Prot) | Hydrolase                             |
| O75879          | 5188 has5188     | Glutamyl-tRNA(Gln) amidotransferase subunit B, r    | PET112   | Homo sapiens (Human) | Reviewed(Swiss-Prot) | Ligase                                |
| O76074          | 8654 has8654     | cGMP-specific 3',5'-cyclic phosphodiesterase        | PDE5A    | Homo sapiens (Human) | Reviewed(Swiss-Prot) | Allosteric enzyme, Hydrolase          |
| O94808          | 9945 has9945     | Glutamine--fructose-6-phosphate aminotransferase    | GFPT2    | Homo sapiens (Human) | Reviewed(Swiss-Prot) | Aminotransferase, Transferase         |
| O94925          | 2744 has2744     | Glutaminase kidney isoform, mitochondrial           | GLS      | Homo sapiens (Human) | Reviewed(Swiss-Prot) | Hydrolase                             |
| O94956          | 11309 has11309   | Solute carrier organic anion transporter family mem | SLCO2B1  | Homo sapiens (Human) | Reviewed(Swiss-Prot) | Bile acid transmembrane transporter   |
| O95363          | 10667 has10667   | Phenylalanine--tRNA ligase, mitochondrial           | FARS2    | Homo sapiens (Human) | Reviewed(Swiss-Prot) | Aminoacyl-tRNA synthetase, Ligase     |
| O95372          | 11313 has11313   | Acyl-protein thioesterase 2                         | LYPLA2   | Homo sapiens (Human) | Reviewed(Swiss-Prot) | Hydrolase                             |
| O95397          |                  | Protein PLEKHA9                                     | PLEKHA9  | Homo sapiens (Human) | Reviewed(Swiss-Prot) | Intermembrane lipid transfer activity |
| O95427          | 23556 has23556   | GPI ethanolamine phosphate transferase 1            | PIGN     | Homo sapiens (Human) | Reviewed(Swiss-Prot) | Transferase                           |
| O95932          | 343641 has343641 | Protein-glutamine gamma-glutamyltransferase 6       | TGM6     | Homo sapiens (Human) | Reviewed(Swiss-Prot) | Acyltransferase, Transferase          |
| P00325          | 125 has125       | Alcohol dehydrogenase 1B                            | ADH1B    | Homo sapiens (Human) | Reviewed(Swiss-Prot) | Oxidoreductase                        |
| P00326          | 126 has126       | Alcohol dehydrogenase 1C                            | ADH1C    | Homo sapiens (Human) | Reviewed(Swiss-Prot) | Oxidoreductase                        |
| P00338          | 3939 has3939     | L-lactate dehydrogenase A chain                     | LDHA     | Homo sapiens (Human) | Reviewed(Swiss-Prot) | Oxidoreductase                        |
| P00439          | 5053 has5053     | Phenylalanine-4-hydroxylase                         | PAH      | Homo sapiens (Human) | Reviewed(Swiss-Prot) | Allosteric enzyme, Monooxygenase,     |
| P00488          | 2162 has2162     | Coagulation factor XIII A chain                     | F13A1    | Homo sapiens (Human) | Reviewed(Swiss-Prot) | Acyltransferase, Transferase          |
| P00505          | 2806 has2806     | Aspartate aminotransferase, mitochondrial           | GOT2     | Homo sapiens (Human) | Reviewed(Swiss-Prot) | Aminotransferase, Transferase         |
| P00709          | 3906 has3906     | Alpha-lactalbumin                                   | LALBA    | Homo sapiens (Human) | Reviewed(Swiss-Prot) | Milk protein                          |
| P00918          | 760 has760       | Carbonic anhydrase 2                                | CA2      | Homo sapiens (Human) | Reviewed(Swiss-Prot) | Lyase                                 |
| P03950          | 283 has283       | Angiogenin                                          | ANG      | Homo sapiens (Human) | Reviewed(Swiss-Prot) | Actin binding                         |
| P04054          | 5319 has5319     | Phospholipase A2                                    | PLA2G1B  | Homo sapiens (Human) | Reviewed(Swiss-Prot) | Function Hydrolase                    |
| P04062          | 2629 has2629     | Glucosylceramidase                                  | GBA      | Homo sapiens (Human) | Reviewed(Swiss-Prot) | Glycosidase, Hydrolase                |



|        |                     |                                                        |         |                      |                      |                                       |
|--------|---------------------|--------------------------------------------------------|---------|----------------------|----------------------|---------------------------------------|
| P04180 | 3931 has3931        | Phosphatidylcholine-sterol acyltransferase             | LCAT    | Homo sapiens (Human) | Reviewed(Swiss-Prot) | Acyltransferase, Transferase          |
| P05089 | 383 has383          | Arginase-1                                             | ARG1    | Homo sapiens (Human) | Reviewed(Swiss-Prot) | Hydrolase                             |
| P05091 | 217 has217          | Aldehyde dehydrogenase, mitochondrial                  | ALDH2   | Homo sapiens (Human) | Reviewed(Swiss-Prot) | Oxidoreductase                        |
| P05164 | 4353 has4353        | Myeloperoxidase                                        | MPO     | Homo sapiens (Human) | Reviewed(Swiss-Prot) | Oxidoreductase, Peroxidase            |
| P05166 | 5096 has5096        | Propionyl-CoA carboxylase beta chain, mitochondr       | PCCB    | Homo sapiens (Human) | Reviewed(Swiss-Prot) | Ligase                                |
| P06126 | 909 has909          | T-cell surface glycoprotein CD1a                       | CD1A    | Homo sapiens (Human) | Reviewed(Swiss-Prot) | Beta-2-microglobulin binding          |
| P06276 | 590 has590          | Cholinesterase                                         | BCHE    | Homo sapiens (Human) | Reviewed(Swiss-Prot) | Hydrolase, Serine esterase            |
| P06280 | 2717 has2717        | Alpha-galactosidase A                                  | GLA     | Homo sapiens (Human) | Reviewed(Swiss-Prot) | Glycosidase, Hydrolase                |
| P06744 | 2821 has2821        | Glucose-6-phosphate isomerase                          | GPI     | Homo sapiens (Human) | Reviewed(Swiss-Prot) | Cytokine, Growth factor, Isomerase    |
| P06858 | 4023 has4023        | Lipoprotein lipase                                     | LPL     | Homo sapiens (Human) | Reviewed(Swiss-Prot) | Heparin-binding, Hydrolase            |
| P07098 | 8513 has8513        | Gastric triacylglycerol lipase                         | LIPF    | Homo sapiens (Human) | Reviewed(Swiss-Prot) | Hydrolase                             |
| P07101 | 7054 has7054        | Tyrosine 3-monooxygenase                               | TH      | Homo sapiens (Human) | Reviewed(Swiss-Prot) | Monooxygenase, Oxidoreductase         |
| P07195 | 3945 has3945        | L-lactate dehydrogenase B chain                        | LDHB    | Homo sapiens (Human) | Reviewed(Swiss-Prot) | Oxidoreductase                        |
| P07311 | 97 has97            | Acylphosphatase-1                                      | ACYP1   | Homo sapiens (Human) | Reviewed(Swiss-Prot) | Hydrolase                             |
| P07311 | 97 has97            | Acylphosphatase-1                                      | ACYP1   | Homo sapiens (Human) | Reviewed(Swiss-Prot) | Hydrolase                             |
| P07327 | 124 has124          | Alcohol dehydrogenase 1A                               | ADH1A   | Homo sapiens (Human) | Reviewed(Swiss-Prot) | Oxidoreductase                        |
| P07741 | 353 has353          | Adenine phosphoribosyltransferase                      | APRT    | Homo sapiens (Human) | Reviewed(Swiss-Prot) | Glycosyltransferase, Transferase      |
| P07864 | 3948 has3948        | L-lactate dehydrogenase C chain                        | LDHC    | Homo sapiens (Human) | Reviewed(Swiss-Prot) | Oxidoreductase                        |
| P07998 | 6035 has6035        | Ribonuclease pancreatic                                | RNASE1  | Homo sapiens (Human) | Reviewed(Swiss-Prot) | Endonuclease activity                 |
| P08243 | 440 has440          | Asparagine synthetase [glutamine-hydrolyzing]          | ASNS    | Homo sapiens (Human) | Reviewed(Swiss-Prot) | Ligase                                |
| P09848 | 3938 has3938        | Lactase-phlorizin hydrolase                            | LCT     | Homo sapiens (Human) | Reviewed(Swiss-Prot) | Glycosidase, Hydrolase, Multifunctio  |
| POC7U2 |                     | Putative neutral ceramidase C                          | ASAH2C  | Homo sapiens (Human) | Reviewed(Swiss-Prot) |                                       |
| POC869 | 1001370.hsa:1001370 | Cytosolic phospholipase A2 beta                        | PLA2G4B | Homo sapiens (Human) | Reviewed(Swiss-Prot) | Hydrolase                             |
| P10253 | 2548 has2548        | Lysosomal alpha-glucosidase                            | GAA     | Homo sapiens (Human) | Reviewed(Swiss-Prot) | Glycosidase, Hydrolase                |
| P10265 | has                 | HERV-K_5q33.3 provirus ancestral Pro protein           |         | Homo sapiens (Human) | Reviewed(Swiss-Prot) | Aspartyl protease, Hydrolase, Protea  |
| P11150 | 3990 has3990        | Hepatic triacylglycerol lipase                         | LIPC    | Homo sapiens (Human) | Reviewed(Swiss-Prot) |                                       |
| P11166 | 6513 has6513        | Solute carrier family 2, facilitated glucose transport | SLC2A1  | Homo sapiens (Human) | Reviewed(Swiss-Prot) | Dehydroascorbic acid transmembran     |
| P11678 | 8288 has8288        | Eosinophil peroxidase                                  | EPX     | Homo sapiens (Human) | Reviewed(Swiss-Prot) | Oxidoreductase, Peroxidase            |
| P11766 | 128 has128          | Alcohol dehydrogenase class-3                          | ADH5    | Homo sapiens (Human) | Reviewed(Swiss-Prot) | Oxidoreductase                        |
| P12724 | 6037 has6037        | Eosinophil cationic protein                            | RNASE3  | Homo sapiens (Human) | Reviewed(Swiss-Prot) | Endonuclease activity                 |
| P12931 | 6714 has6714        | Proto-oncogene tyrosine-protein kinase Src             | SRC     | Homo sapiens (Human) | Reviewed(Swiss-Prot) | Kinase, Transferase, Tyrosine-protein |
| P12931 | 6714 has6714        | Proto-oncogene tyrosine-protein kinase Src             | SRC     | Homo sapiens (Human) | Reviewed(Swiss-Prot) | ATP binding                           |
| P13196 | 211 has211          | 5-aminolevulinatase synthase, nonspecific, mitochondr  | ALAS1   | Homo sapiens (Human) | Reviewed(Swiss-Prot) | Acyltransferase, Transferase          |
| P14174 | 4282 has4282        | Macrophage migration inhibitory factor                 | MIF     | Homo sapiens (Human) | Reviewed(Swiss-Prot) | Chemoattractant activity              |
| P14410 | 6476 has6476        | Sucrase-isomaltase, intestinal                         | SI      | Homo sapiens (Human) | Reviewed(Swiss-Prot) | Glycosidase, Hydrolase, Multifunctio  |
| P14555 | 5320 has5320        | Phospholipase A2, membrane associated                  | PLA2G2A | Homo sapiens (Human) | Reviewed(Swiss-Prot) | Hydrolase                             |
| P14621 | 98 has98            | Acylphosphatase-2                                      | ACYP2   | Homo sapiens (Human) | Reviewed(Swiss-Prot) | Hydrolase                             |
| P14621 | 98 has98            | Acylphosphatase-2                                      | ACYP2   | Homo sapiens (Human) | Reviewed(Swiss-Prot) | Hydrolase                             |
| P14920 | 1610 has1610        | D-amino-acid oxidase                                   | DAO     | Homo sapiens (Human) | Reviewed(Swiss-Prot) | Oxidoreductase                        |
| P15086 | 1360 has1360        | Carboxypeptidase B                                     | CPB1    | Homo sapiens (Human) | Reviewed(Swiss-Prot) | Carboxypeptidase, Hydrolase, Metall   |
| P15104 | 2752 has2752        | Glutamine synthetase                                   | GLUL    | Homo sapiens (Human) | Reviewed(Swiss-Prot) | Ligase, Lyase                         |
| P15121 | 231 has231          | Aldose reductase                                       | AKR1B1  | Homo sapiens (Human) | Reviewed(Swiss-Prot) | Oxidoreductase                        |
| P15144 | 290 has290          | Aminopeptidase N                                       | ANPEP   | Homo sapiens (Human) | Reviewed(Swiss-Prot) | Aminopeptidase, Developmental prot    |
| P15291 | 2683 has2683        | Beta-1,4-galactosyltransferase 1                       | B4GALT1 | Homo sapiens (Human) | Reviewed(Swiss-Prot) | Glycosyltransferase, Transferase      |
| P15812 | 913 has913          | T-cell surface glycoprotein CD1e, membrane-assoc       | CD1E    | Homo sapiens (Human) | Reviewed(Swiss-Prot) | Beta-3-microglobulin binding          |
| P15813 | 912 has912          | Antigen-presenting glycoprotein CD1d                   | CD1D    | Homo sapiens (Human) | Reviewed(Swiss-Prot) | Beta-4-microglobulin binding          |
| P16233 | 5406 has5406        | Pancreatic triacylglycerol lipase                      | PNLIP   | Homo sapiens (Human) | Reviewed(Swiss-Prot) | Hydrolase                             |
| P17174 |                     | Aspartate aminotransferase, cytoplasmic                | GOT1    | Homo sapiens (Human) | Reviewed(Swiss-Prot) | Aminotransferase, Transferase         |

|        |                |                                                                   |         |                      |                      |                                                         |
|--------|----------------|-------------------------------------------------------------------|---------|----------------------|----------------------|---------------------------------------------------------|
| P17735 | 6898 has6898   | Tyrosine aminotransferase                                         | TAT     | Homo sapiens (Human) | Reviewed(Swiss-Prot) | Aminotransferase, Transferase                           |
| P17812 | 1503 has1503   | CTP synthase 1                                                    | CTPS1   | Homo sapiens (Human) | Reviewed(Swiss-Prot) | Ligase                                                  |
| P17900 | 2760 has2760   | Ganglioside GM2 activator                                         | GM2A    | Homo sapiens (Human) | Reviewed(Swiss-Prot) | Hydrolase                                               |
| P18428 | 3929 has3929   | Lipopolysaccharide-binding protein                                | LBP     | Homo sapiens (Human) | Reviewed(Swiss-Prot) | Antibiotic, Antimicrobial                               |
| P19367 | 3098 has3098   | Hexokinase-1                                                      | HK1     | Homo sapiens (Human) | Reviewed(Swiss-Prot) | Allosteric enzyme, Kinase, Transferase                  |
| P19835 |                | Bile salt-activated lipase                                        | CEL     | Homo sapiens (Human) | Reviewed(Swiss-Prot) | Hydrolase, Serine esterase                              |
| P20711 | 1644 has1644   | Aromatic-L-amino-acid decarboxylase                               | DDC     | Homo sapiens (Human) | Reviewed(Swiss-Prot) | Decarboxylase, Lyase                                    |
| P21399 | 48 has48       | Cytoplasmic aconitate hydratase                                   | ACO1    | Homo sapiens (Human) | Reviewed(Swiss-Prot) |                                                         |
| P21549 | 189 has189     | Serine--pyruvate aminotransferase                                 | AGXT    | Homo sapiens (Human) | Reviewed(Swiss-Prot) | Aminotransferase, Transferase                           |
| P21549 | 189 has189     | Serine--pyruvate aminotransferase                                 | AGXT    | Homo sapiens (Human) | Reviewed(Swiss-Prot) | Aminotransferase, Transferase                           |
| P21964 | 1312 has1312   | Catechol O-methyltransferase                                      | COMT    | Homo sapiens (Human) | Reviewed(Swiss-Prot) | Methyltransferase, Transferase                          |
| P21980 | 7052 has7052   | Protein-glutamine gamma-glutamyltransferase 2                     | TGM2    | Homo sapiens (Human) | Reviewed(Swiss-Prot) | Acyltransferase, Transferase                            |
| P22079 | 4025 has4025   | Lactoperoxidase                                                   | LPO     | Homo sapiens (Human) | Reviewed(Swiss-Prot) | Antimicrobial, Oxidoreductase, Peroxidase               |
| P22102 | 2618 has2618   | Trifunctional purine biosynthetic protein adenosine GART          | GART    | Homo sapiens (Human) | Reviewed(Swiss-Prot) | Ligase, Multifunctional enzyme, Transferase             |
| P22303 | 43 has43       | Acetylcholinesterase                                              | ACHE    | Homo sapiens (Human) | Reviewed(Swiss-Prot) | Blood group antigen, Hydrolase, Serine esterase         |
| P22557 | 212 has212     | 5-aminolevulinic acid synthase, erythroid-specific, mitochondrial | ALAS2   | Homo sapiens (Human) | Reviewed(Swiss-Prot) | Acyltransferase, Transferase                            |
| P22735 | 7051 has7051   | Protein-glutamine gamma-glutamyltransferase K                     | TGM1    | Homo sapiens (Human) | Reviewed(Swiss-Prot) | Acyltransferase, Transferase                            |
| P23141 | 1066 has1066   | Liver carboxylesterase 1                                          | CES1    | Homo sapiens (Human) | Reviewed(Swiss-Prot) | Hydrolase, Serine esterase                              |
| P23378 | 2731 has2731   | Glycine dehydrogenase (decarboxylating), mitochondrial            | GLDC    | Homo sapiens (Human) | Reviewed(Swiss-Prot) | Oxidoreductase                                          |
| P23415 | 2741 has2741   | Glycine receptor subunit alpha-1                                  | GLRA1   | Homo sapiens (Human) | Reviewed(Swiss-Prot) | Chloride channel, Ion channel, Ligand-gated ion channel |
| P23416 | 2742 has2742   | Glycine receptor subunit alpha-2                                  | GLRA2   | Homo sapiens (Human) | Reviewed(Swiss-Prot) | Chloride channel, Ion channel, Ligand-gated ion channel |
| P23434 | 2653 has2653   | Glycine cleavage system H protein, mitochondrial                  | GCSH    | Homo sapiens (Human) | Reviewed(Swiss-Prot) | Aminomethyltransferase activity                         |
| P24298 | 2875 has2875   | Alanine aminotransferase 1                                        | GPT     | Homo sapiens (Human) | Reviewed(Swiss-Prot) | Aminotransferase, Transferase                           |
| P26640 | 7407 has7407   | Valine--tRNA ligase                                               | VARS    | Homo sapiens (Human) | Reviewed(Swiss-Prot) | Aminoacyl-tRNA synthetase, Ligase                       |
| P27708 | 790 has790     | CAD protein                                                       | CAD     | Homo sapiens (Human) | Reviewed(Swiss-Prot) | Allosteric enzyme, Hydrolase, Ligase                    |
| P28329 | 1103 has1103   | Choline O-acetyltransferase                                       | CHAT    | Homo sapiens (Human) | Reviewed(Swiss-Prot) | Acyltransferase, Transferase                            |
| P28332 | 130 has130     | Alcohol dehydrogenase 6                                           | ADH6    | Homo sapiens (Human) | Reviewed(Swiss-Prot) | Oxidoreductase                                          |
| P28838 | 51056 has51056 | Cytosol aminopeptidase                                            | LAP3    | Homo sapiens (Human) | Reviewed(Swiss-Prot) | Aminopeptidase, Hydrolase, Protease                     |
| P29016 | 910 has910     | T-cell surface glycoprotein CD1b                                  | CD1B    | Homo sapiens (Human) | Reviewed(Swiss-Prot) | Beta-5-microglobulin binding                            |
| P29017 | 911 has911     | T-cell surface glycoprotein CD1c                                  | CD1C    | Homo sapiens (Human) | Reviewed(Swiss-Prot) | Beta-6-microglobulin binding                            |
| P30041 | 9588 has9588   | Peroxiredoxin-6                                                   | PRDX6   | Homo sapiens (Human) | Reviewed(Swiss-Prot) | Antioxidant, Hydrolase, Multifunctional enzyme          |
| P30837 | 219 has219     | Aldehyde dehydrogenase X, mitochondrial                           | ALDH1B1 | Homo sapiens (Human) | Reviewed(Swiss-Prot) | Oxidoreductase                                          |
| P31512 | 2329 has2329   | Dimethylaniline monooxygenase [N-oxide-forming]                   | FMO4    | Homo sapiens (Human) | Reviewed(Swiss-Prot) | Monooxygenase, Oxidoreductase                           |
| P31513 | 2328 has2328   | Dimethylaniline monooxygenase [N-oxide-forming]                   | FMO3    | Homo sapiens (Human) | Reviewed(Swiss-Prot) | Monooxygenase, Oxidoreductase                           |
| P32929 | 1491 has1491   | Cystathionine gamma-lyase                                         | CTH     | Homo sapiens (Human) | Reviewed(Swiss-Prot) | Calmodulin-binding, Lyase                               |
| P34896 | 6470 has6470   | Serine hydroxymethyltransferase, cytosolic                        | SHMT1   | Homo sapiens (Human) | Reviewed(Swiss-Prot) | Transferase                                             |
| P34897 | 6472 has6472   | Serine hydroxymethyltransferase, mitochondrial                    | SHMT2   | Homo sapiens (Human) | Reviewed(Swiss-Prot) | Transferase                                             |
| P35222 |                | Catenin beta-1                                                    | CTNNB1  | Homo sapiens (Human) | Reviewed(Swiss-Prot) |                                                         |
| P35520 | 875 has875     | Cystathionine beta-synthase                                       | CBS     | Homo sapiens (Human) | Reviewed(Swiss-Prot) | Allosteric enzyme, Lyase                                |
| P35557 | 2645 has2645   | Glucokinase                                                       | GCK     | Homo sapiens (Human) | Reviewed(Swiss-Prot) | Allosteric enzyme, Kinase, Transferase                  |
| P35573 | 178 has178     | Glycogen debranching enzyme                                       | AGL     | Homo sapiens (Human) | Reviewed(Swiss-Prot) | Glycosidase, Glycosyltransferase, Hydrolase             |
| P35575 | 2538 has2538   | Glucose-6-phosphatase                                             | G6PC    | Homo sapiens (Human) | Reviewed(Swiss-Prot) | Hydrolase                                               |
| P35790 | 1119 has1119   | Choline kinase alpha                                              | CHKA    | Homo sapiens (Human) | Reviewed(Swiss-Prot) | Kinase, Transferase                                     |
| P36871 | 5236 has5236   | Phosphoglucomutase-1                                              | PGM1    | Homo sapiens (Human) | Reviewed(Swiss-Prot) | Isomerase                                               |
| P37231 | 5468 has5468   | Peroxisome proliferator-activated receptor gamma                  | PPARG   | Homo sapiens (Human) | Reviewed(Swiss-Prot) |                                                         |
| P37287 | 5277 has5277   | Phosphatidylinositol N-acetylglucosaminyltransferase              | PIGA    | Homo sapiens (Human) | Reviewed(Swiss-Prot) | Glycosyltransferase, Transferase                        |
| P39877 | 5322 has5322   | Calcium-dependent phospholipase A2                                | PLA2G5  | Homo sapiens (Human) | Reviewed(Swiss-Prot) | Hydrolase                                               |
| P40394 | 131 has131     | Alcohol dehydrogenase class 4 mu/sigma chain                      | ADH7    | Homo sapiens (Human) | Reviewed(Swiss-Prot) | Oxidoreductase                                          |

|        |                |                                                      |          |                      |                      |                                      |
|--------|----------------|------------------------------------------------------|----------|----------------------|----------------------|--------------------------------------|
| P40926 | 4191 has4191   | Malate dehydrogenase, mitochondrial                  | MDH2     | Homo sapiens (Human) | Reviewed(Swiss-Prot) | Oxidoreductase                       |
| P41247 | 8228 has8228   | Patatin-like phospholipase domain-containing prote   | PNPLA4   | Homo sapiens (Human) | Reviewed(Swiss-Prot) | Hydrolase                            |
| P41250 | 2617 has2617   | Glycine--tRNA ligase                                 | GARS     | Homo sapiens (Human) | Reviewed(Swiss-Prot) | Aminoacyl-tRNA synthetase, Hydrol    |
| P43007 | 6509 has6509   | Neutral amino acid transporter A                     | SLC1A4   | Homo sapiens (Human) | Reviewed(Swiss-Prot) | Amino acid transmembrane transport   |
| P45381 | 443 has443     | Aspartoacylase                                       | ASPA     | Homo sapiens (Human) | Reviewed(Swiss-Prot) | Hydrolase                            |
| P47712 | 5321 has5321   | Cytosolic phospholipase A2                           | PLA2G4A  | Homo sapiens (Human) | Reviewed(Swiss-Prot) | Hydrolase                            |
| P47895 | 220 has220     | Aldehyde dehydrogenase family 1 member A3            | ALDH1A3  | Homo sapiens (Human) | Reviewed(Swiss-Prot) | Oxidoreductase                       |
| P47897 | 5859 has5859   | Glutamine--tRNA ligase                               | QARS     | Homo sapiens (Human) | Reviewed(Swiss-Prot) | Aminoacyl-tRNA synthetase, Ligase    |
| P48067 | 6536 has6536   | Sodium- and chloride-dependent glycine transporte    | SLC6A9   | Homo sapiens (Human) | Reviewed(Swiss-Prot) | Glycine:sodium symporter activity    |
| P48167 | 2743 has2743   | Glycine receptor subunit beta                        | GLRB     | Homo sapiens (Human) | Reviewed(Swiss-Prot) | Chloride channel, Ion channel, Ligan |
| P48637 | 2937 has2937   | Glutathione synthetase                               | GSS      | Homo sapiens (Human) | Reviewed(Swiss-Prot) | Ligase                               |
| P48728 | 275 has275     | Aminomethyltransferase, mitochondrial                | AMT      | Homo sapiens (Human) | Reviewed(Swiss-Prot) | Aminotransferase, Transferase        |
| P49189 | 223 has223     | 4-trimethylaminobutyraldehyde dehydrogenase          | ALDH9A1  | Homo sapiens (Human) | Reviewed(Swiss-Prot) | Oxidoreductase                       |
| P49221 | 7047 has7047   | Protein-glutamine gamma-glutamyltransferase 4        | TGM4     | Homo sapiens (Human) | Reviewed(Swiss-Prot) | Acyltransferase, Transferase         |
| P49326 | 2330 has2330   | Dimethylaniline monooxygenase [N-oxide-forming       | FMO5     | Homo sapiens (Human) | Reviewed(Swiss-Prot) | Monooxygenase, Oxidoreductase        |
| P49327 | 2194 has2194   | Fatty acid synthase                                  | FASN     | Homo sapiens (Human) | Reviewed(Swiss-Prot) | Hydrolase, Lyase, Multifunctional en |
| P49419 | 501 has501     | Alpha-aminoadipic semialdehyde dehydrogenase         | ALDH7A1  | Homo sapiens (Human) | Reviewed(Swiss-Prot) | Oxidoreductase                       |
| P49585 | 5130 has5130   | Choline-phosphate cytidyltransferase A               | PCYT1A   | Homo sapiens (Human) | Reviewed(Swiss-Prot) | Nucleotidyltransferase, Transferase  |
| P49588 | 16 has16       | Alanine--tRNA ligase, cytoplasmic                    | AARS     | Homo sapiens (Human) | Reviewed(Swiss-Prot) | Aminoacyl-tRNA synthetase, Ligase,   |
| P49753 | 10965 has10965 | Acyl-coenzyme A thioesterase 2, mitochondrial        | ACOT2    | Homo sapiens (Human) | Reviewed(Swiss-Prot) | Hydrolase, Serine esterase           |
| P49915 | 8833 has8833   | GMP synthase [glutamine-hydrolyzing]                 | GMPS     | Homo sapiens (Human) | Reviewed(Swiss-Prot) | Ligase                               |
| P50440 | 2628 has2628   | Glycine amidinotransferase, mitochondrial            | GATM     | Homo sapiens (Human) | Reviewed(Swiss-Prot) | Transferase                          |
| P51648 | 224 has224     | Fatty aldehyde dehydrogenase                         | ALDH3A2  | Homo sapiens (Human) | Reviewed(Swiss-Prot) | Oxidoreductase                       |
| P52789 | 3099 has3099   | Hexokinase-2                                         | HK2      | Homo sapiens (Human) | Reviewed(Swiss-Prot) | Allosteric enzyme, Kinase, Transfera |
| P52790 | 3101 has3101   | Hexokinase-3                                         | HK3      | Homo sapiens (Human) | Reviewed(Swiss-Prot) | Allosteric enzyme, Kinase, Transfera |
| P53396 | 47 has47       | ATP-citrate synthase                                 | ACLY     | Homo sapiens (Human) | Reviewed(Swiss-Prot) | ATP binding                          |
| P54315 | 5407 has5407   | Inactive pancreatic lipase-related protein 1         | PNLIPRP1 | Homo sapiens (Human) | Reviewed(Swiss-Prot) | Calcium ion binding                  |
| P54317 | 5408 has5408   | Pancreatic lipase-related protein 2                  | PNLIPRP2 | Homo sapiens (Human) | Reviewed(Swiss-Prot) | Hydrolase                            |
| P54687 | 586 has586     | Branched-chain-amino-acid aminotransferase, cyto     | BCAT1    | Homo sapiens (Human) | Reviewed(Swiss-Prot) | Aminotransferase, Transferase        |
| P57054 | 51227 has51227 | Phosphatidylinositol N-acetylglucosaminyltransfera   | PIGP     | Homo sapiens (Human) | Reviewed(Swiss-Prot) | Glycosyltransferase, Transferase     |
| P61916 | 10577 has10577 | Epididymal secretory protein E1                      | NPC2     | Homo sapiens (Human) | Reviewed(Swiss-Prot) | Cholesterol binding                  |
| P68402 | 5049 has5049   | Platelet-activating factor acetylhydrolase IB subuni | PAFAH1B2 | Homo sapiens (Human) | Reviewed(Swiss-Prot) | Hydrolase                            |
| P78540 | 384 has384     | Arginase-2, mitochondrial                            | ARG2     | Homo sapiens (Human) | Reviewed(Swiss-Prot) | Hydrolase                            |
| P80404 | 18 has18       | 4-aminobutyrate aminotransferase, mitochondrial      | ABAT     | Homo sapiens (Human) | Reviewed(Swiss-Prot) | Aminotransferase, Transferase        |
| Q01740 | 2326 has2326   | Dimethylaniline monooxygenase [N-oxide-forming       | FMO1     | Homo sapiens (Human) | Reviewed(Swiss-Prot) | Monooxygenase, Oxidoreductase        |
| Q03154 | 95 has95       | Aminoacylase-1                                       | ACY1     | Homo sapiens (Human) | Reviewed(Swiss-Prot) | Hydrolase                            |
| Q05315 | 1178 has1178   | Eosinophil lysophospholipase                         | CLC      | Homo sapiens (Human) | Reviewed(Swiss-Prot) | Carbohydrate binding                 |
| Q05469 | 3991 has3991   | Hormone-sensitive lipase                             | LIPE     | Homo sapiens (Human) | Reviewed(Swiss-Prot) | Hydrolase                            |
| Q06203 | 5471 has5471   | Amidophosphoribosyltransferase                       | PPAT     | Homo sapiens (Human) | Reviewed(Swiss-Prot) | Allosteric enzyme, Glycosyltransfera |
| Q06210 | 2673 has2673   | Glutamine--fructose-6-phosphate aminotransferase     | GFPT1    | Homo sapiens (Human) | Reviewed(Swiss-Prot) | Aminotransferase, Transferase        |
| Q07326 | 5281 has5281   | Phosphatidylinositol-glycan biosynthesis class F pr  | PIGF     | Homo sapiens (Human) | Reviewed(Swiss-Prot) | Ethanolaminophosphotransferase acti  |
| Q08188 | 7053 has7053   | Protein-glutamine gamma-glutamyltransferase E        | TGM3     | Homo sapiens (Human) | Reviewed(Swiss-Prot) | Acyltransferase, Transferase         |
| Q12879 | 2903 has2903   | Glutamate receptor ionotropic, NMDA 2A               | GRIN2A   | Homo sapiens (Human) | Reviewed(Swiss-Prot) | Ion channel, Ligand-gated ion chann  |
| Q13093 | 7941 has7941   | Platelet-activating factor acetylhydrolase           | PLA2G7   | Homo sapiens (Human) | Reviewed(Swiss-Prot) | Hydrolase                            |
| Q13336 | 6563 has6563   | Urea transporter 1                                   | SLC14A1  | Homo sapiens (Human) | Reviewed(Swiss-Prot) | Blood group antigen                  |
| Q13393 | 5337 has5337   | Phospholipase D1                                     | PLD1     | Homo sapiens (Human) | Reviewed(Swiss-Prot) | Hydrolase                            |
| Q13510 | 427 has427     | Acid ceramidase                                      | ASAH1    | Homo sapiens (Human) | Reviewed(Swiss-Prot) | Hydrolase                            |
| Q13724 | 7841 has7841   | Mannosyl-oligosaccharide glucosidase                 | MOGS     | Homo sapiens (Human) | Reviewed(Swiss-Prot) | Glycosidase, Hydrolase               |

|        |        |           |                                                                     |           |                      |                      |                                              |
|--------|--------|-----------|---------------------------------------------------------------------|-----------|----------------------|----------------------|----------------------------------------------|
| Q14032 | 570    | has570    | Bile acid-CoA:amino acid N-acyltransferase                          | BAAT      | Homo sapiens (Human) | Reviewed(Swiss-Prot) | Acyltransferase, Hydrolase, Serine es        |
| Q14330 | 2841   | has2841   | N-arachidonyl glycine receptor                                      | GPR18     | Homo sapiens (Human) | Reviewed(Swiss-Prot) | G-protein coupled receptor, Receptor         |
| Q14397 | 2646   | has2646   | Glucokinase regulatory protein                                      | GCKR      | Homo sapiens (Human) | Reviewed(Swiss-Prot) | Fructose-6-phosphate binding                 |
| Q14442 | 5283   | has5283   | Phosphatidylinositol N-acetylglucosaminyltransferase                | PIGH      | Homo sapiens (Human) | Reviewed(Swiss-Prot) | Glycosyltransferase, Transferase             |
| Q14697 | 23193  | has23193  | Neutral alpha-glucosidase AB                                        | GANAB     | Homo sapiens (Human) | Reviewed(Swiss-Prot) | Glycosidase, Hydrolase                       |
| Q14749 | 27232  | has27232  | Glycine N-methyltransferase                                         | GNMT      | Homo sapiens (Human) | Reviewed(Swiss-Prot) | Methyltransferase, Transferase               |
| Q14749 | 27232  | has27232  | Glycine N-methyltransferase                                         | GNMT      | Homo sapiens (Human) | Reviewed(Swiss-Prot) | Methyltransferase, Transferase               |
| Q14957 | 2905   | has2905   | Glutamate receptor ionotropic, NMDA 2C                              | GRIN2C    | Homo sapiens (Human) | Reviewed(Swiss-Prot) | Ion channel, Ligand-gated ion channel        |
| Q15102 | 5050   | has5050   | Platelet-activating factor acetylhydrolase IB subunit               | PAFAH1B3  | Homo sapiens (Human) | Reviewed(Swiss-Prot) | Hydrolase                                    |
| Q15758 | 6510   | has6510   | Neutral amino acid transporter B(0)                                 | SLC1A5    | Homo sapiens (Human) | Reviewed(Swiss-Prot) | Host cell receptor for virus entry, Receptor |
| Q15849 | 8170   | has8170   | Urea transporter 2                                                  | SLC14A2   | Homo sapiens (Human) | Reviewed(Swiss-Prot) | Cell adhesion molecule binding               |
| Q16719 | 8942   | has8942   | Kynureninase                                                        | KYNU      | Homo sapiens (Human) | Reviewed(Swiss-Prot) | Hydrolase                                    |
| Q16773 | 883    | has883    | Kynurenine--oxoglutarate transaminase 1                             | CCBL1     | Homo sapiens (Human) | Reviewed(Swiss-Prot) | Aminotransferase, Lyase, Transferase         |
| Q17RR3 | 119548 | has119548 | Pancreatic lipase-related protein 3                                 | PNLIPRP3  | Homo sapiens (Human) | Reviewed(Swiss-Prot) | Hydrolase                                    |
| Q2TB90 | 80201  | has80201  | Putative hexokinase HKDC1                                           | HKDC1     | Homo sapiens (Human) | Reviewed(Swiss-Prot) | Kinase, Transferase                          |
| Q3MJ16 | 123745 | has123745 | Cytosolic phospholipase A2 epsilon                                  | PLA2G4E   | Homo sapiens (Human) | Reviewed(Swiss-Prot) | Hydrolase                                    |
| Q3MUY  | 84992  | has84992  | Phosphatidylinositol N-acetylglucosaminyltransferase                | PIGY      | Homo sapiens (Human) | Reviewed(Swiss-Prot) |                                              |
| Q53ET4 |        |           | Serine hydroxymethyltransferase                                     | N/A       | Homo sapiens (Human) | Reviewed(Swiss-Prot) | Methyltransferase, Transferase               |
| Q53EW1 |        |           | Peroxisome proliferative activated receptor gamma isoform 2 variant |           | Homo sapiens (Human) | Reviewed(Swiss-Prot) |                                              |
| Q53FV7 | 1375   | has1375   | Carnitine palmitoyltransferase 1B isoform a variant                 |           | Homo sapiens (Human) | Reviewed(Swiss-Prot) | Acyltransferase, Transferase                 |
| Q53GD3 | 80736  | has80736  | Choline transporter-like protein 4                                  | SLC44A4   | Homo sapiens (Human) | Reviewed(Swiss-Prot) | Choline transmembrane transporter            |
| Q59EA4 | 5337   | has5337   | Submitted name: Phospholipase D1 variant                            | N/A       | Homo sapiens (Human) | Unreviewed(TrEMBL)   | Phosphatidylinositol binding                 |
| Q5BJF5 | 6472   | has6472   | Serine hydroxymethyltransferase                                     | SHMT2     | Homo sapiens (Human) | Reviewed(Swiss-Prot) | Transferase                                  |
| Q5H8A4 | 54872  | has54872  | GPI ethanolamine phosphate transferase 2                            | PIGG      | Homo sapiens (Human) | Reviewed(Swiss-Prot) | Transferase                                  |
| Q5HYG8 | 6472   | has6472   | Serine hydroxymethyltransferase                                     | DKFZp686I | Homo sapiens (Human) | Reviewed(Swiss-Prot) | Transferase                                  |
| Q5JTZ9 | 57505  | has57505  | Alanine--tRNA ligase, mitochondrial                                 | AARS2     | Homo sapiens (Human) | Reviewed(Swiss-Prot) | Aminoacyl-tRNA synthetase, Ligase,           |
| Q5K4L6 | 11000  | has11000  | Long-chain fatty acid transport protein 3                           | SLC27A3   | Homo sapiens (Human) | Reviewed(Swiss-Prot) | Ligase                                       |
| Q5QJU3 | 340485 | has340485 | Alkaline ceramidase 2                                               | ACER2     | Homo sapiens (Human) | Reviewed(Swiss-Prot) | Hydrolase                                    |
| Q5ST30 | 57176  | has57176  | Valine--tRNA ligase, mitochondrial                                  | VARS2     | Homo sapiens (Human) | Reviewed(Swiss-Prot) | Aminoacyl-tRNA synthetase, Ligase            |
| Q5T6X5 | 222545 | has222545 | G-protein coupled receptor family C group 6 member                  | GPRC6A    | Homo sapiens (Human) | Reviewed(Swiss-Prot) | G-protein coupled receptor, Receptor         |
| Q5TA50 | 80772  | has80772  | Glycolipid transfer protein domain-containing protein               | GLTPD1    | Homo sapiens (Human) | Reviewed(Swiss-Prot) | Ceramide 1-phosphate binding                 |
| Q68DD2 | 255189 | has255189 | Cytosolic phospholipase A2 zeta                                     | PLA2G4F   | Homo sapiens (Human) | Reviewed(Swiss-Prot) | Hydrolase                                    |
| Q6FHZ7 | 123    | has123    | ADFP protein                                                        | ADFP      | Homo sapiens (Human) | Reviewed(Swiss-Prot) |                                              |
| Q6IA69 | 55191  | has55191  | Glutamine-dependent NAD(+) synthetase                               | NADSYN1   | Homo sapiens (Human) | Reviewed(Swiss-Prot) | Ligase                                       |
| Q6IB77 | 10249  | has10249  | Glycine N-acyltransferase                                           | GLYAT     | Homo sapiens (Human) | Reviewed(Swiss-Prot) | Acyltransferase, Transferase                 |
| Q6IBR2 | 2193   | has2193   | Submitted name: FARSLA protein                                      | FARSLA    | Homo sapiens (Human) | Reviewed(Swiss-Prot) | Aminoacyl-tRNA synthetase, Ligase            |
| Q6L9M1 |        |           | Peroxisome proliferator-activated receptor                          | PPARG     | Homo sapiens (Human) | Reviewed(Swiss-Prot) |                                              |
| Q6NT32 | 221223 | has221223 | Carboxylesterase 5A                                                 | CES5A     | Homo sapiens (Human) | Reviewed(Swiss-Prot) | Hydrolase, Serine esterase                   |
| Q6P1A2 | 10162  | has10162  | Lysophospholipid acyltransferase 5                                  | LPCAT3    | Homo sapiens (Human) | Reviewed(Swiss-Prot) | Acyltransferase, Transferase                 |
| Q6P1J6 | 151056 | has151056 | Phospholipase B1, membrane-associated                               | PLB1      | Homo sapiens (Human) | Reviewed(Swiss-Prot) | Acyltransferase, Transferase                 |
| Q6P1M0 | 10999  | has10999  | Long-chain fatty acid transport protein 4                           | SLC27A4   | Homo sapiens (Human) | Reviewed(Swiss-Prot) | Ligase                                       |
| Q6PCB7 | 376497 | has376497 | Long-chain fatty acid transport protein 1                           | SLC27A1   | Homo sapiens (Human) | Reviewed(Swiss-Prot) | Ligase                                       |
| Q6UWW  | 23491  | has23491  | Carboxylesterase 3                                                  | CES3      | Homo sapiens (Human) | Reviewed(Swiss-Prot) | Hydrolase, Serine esterase                   |
| Q6YP21 | 56267  | has56267  | Kynurenine--oxoglutarate transaminase 3                             | CCBL2     | Homo sapiens (Human) | Reviewed(Swiss-Prot) | Aminotransferase, Lyase, Transferase         |
| Q6ZMR  | 160287 | has160287 | L-lactate dehydrogenase A-like 6A                                   | LDHAL6A   | Homo sapiens (Human) | Reviewed(Swiss-Prot) | Oxidoreductase                               |
| Q71UV7 |        |           | Blood group Kidd urea transporter                                   | HUT11     | Homo sapiens (Human) | Reviewed(Swiss-Prot) | Acyltransferase, Transferase                 |
| Q7L5N7 | 54947  | has54947  | Lysophosphatidylcholine acyltransferase 2                           | LPCAT2    | Homo sapiens (Human) | Reviewed(Swiss-Prot) | Acyltransferase, Transferase                 |
| Q7Z2H8 | 206358 | has206358 | Proton-coupled amino acid transporter 1                             | SLC36A1   | Homo sapiens (Human) | Reviewed(Swiss-Prot) | Amino acid:proton symporter activity         |

|        |        |           |                                                       |          |                      |                      |                                            |
|--------|--------|-----------|-------------------------------------------------------|----------|----------------------|----------------------|--------------------------------------------|
| Q7Z7B1 | 284098 | has284098 | Phosphatidylinositol-glycan biosynthesis class W p    | PIGW     | Homo sapiens (Human) | Reviewed(Swiss-Prot) | Acyltransferase, Transferase               |
| Q86TX2 | 641371 | has641371 | Acyl-coenzyme A thioesterase 1                        | ACOT1    | Homo sapiens (Human) | Reviewed(Swiss-Prot) | Hydrolase, Serine esterase                 |
| Q86U10 | 374569 | has374569 | 60 kDa lysophospholipase                              | ASPG     | Homo sapiens (Human) | Reviewed(Swiss-Prot) | Hydrolase                                  |
| Q86VD9 | 80235  | has80235  | GPI mannosyltransferase 4                             | PIGZ     | Homo sapiens (Human) | Reviewed(Swiss-Prot) | Glycosyltransferase, Transferase           |
| Q86WD1 |        |           | CREB3L2-PPARgamma                                     |          | Homo sapiens (Human) | Reviewed(Swiss-Prot) |                                            |
| Q86XP0 | 283748 | has283748 | Cytosolic phospholipase A2 delta                      | PLA2G4D  | Homo sapiens (Human) | Reviewed(Swiss-Prot) | Hydrolase                                  |
| Q86Z02 | 204851 | has204851 | Homeodomain-interacting protein kinase 1              | HIPK1    | Homo sapiens (Human) | Reviewed(Swiss-Prot) | Kinase, Serine/threonine-protein kinase    |
| Q8IUZ5 | 85007  | has85007  | 5-phosphohydroxy-L-lysine phospho-lyase               | AGXT2L2  | Homo sapiens (Human) | Reviewed(Swiss-Prot) | Aminotransferase, Lyase, Transferase       |
| Q8IV08 | 23646  | has23646  | Phospholipase D3                                      | PLD3     | Homo sapiens (Human) | Reviewed(Swiss-Prot) | Hydrolase                                  |
| Q8IWA5 | 57153  | has57153  | Choline transporter-like protein 2                    | SLC44A2  | Homo sapiens (Human) | Reviewed(Swiss-Prot) | Choline transmembrane transporter activity |
| Q8IY17 | 10908  | has10908  | Neuropathy target esterase                            | PNPLA6   | Homo sapiens (Human) | Reviewed(Swiss-Prot) | Hydrolase                                  |
| Q8N0X4 | 171425 | has171425 | Citramalyl-CoA lyase, mitochondrial                   | CLYBL    | Homo sapiens (Human) | Reviewed(Swiss-Prot) |                                            |
| Q8N2A8 | 201164 | has201164 | Mitochondrial cardiolipin hydrolase                   | PLD6     | Homo sapiens (Human) | Reviewed(Swiss-Prot) | Endonuclease, Hydrolase, Nuclease          |
| Q8N4M1 | 126969 | has126969 | Choline transporter-like protein 3                    | SLC44A3  | Homo sapiens (Human) | Reviewed(Swiss-Prot) | Choline transmembrane transporter activity |
| Q8N5D6 | 26301  | has26301  | Globoside alpha-1,3-N-acetylgalactosaminyltransferase | GBGT1    | Homo sapiens (Human) | Reviewed(Swiss-Prot) | Glycosyltransferase, Transferase           |
| Q8N6M1 | 55821  | has55821  | Probable allantoinase                                 | ALLC     | Homo sapiens (Human) | Reviewed(Swiss-Prot) | Hydrolase                                  |
| Q8N9L9 | 122970 | has122970 | Acyl-coenzyme A thioesterase 4                        | ACOT4    | Homo sapiens (Human) | Reviewed(Swiss-Prot) | Hydrolase, Serine esterase                 |
| Q8NCC3 | 23659  | has23659  | Group XV phospholipase A2                             | PLA2G15  | Homo sapiens (Human) | Reviewed(Swiss-Prot) | Acyltransferase, Hydrolase, Transferase    |
| Q8NE62 | 55349  | has55349  | Choline dehydrogenase, mitochondrial                  | CHDH     | Homo sapiens (Human) | Reviewed(Swiss-Prot) | Oxidoreductase                             |
| Q8NF37 | 79888  | has79888  | Lysophosphatidylcholine acyltransferase 1             | LPCAT1   | Homo sapiens (Human) | Reviewed(Swiss-Prot) | Acyltransferase, Transferase               |
| Q8TBF5 | 54965  | has54965  | Phosphatidylinositol-glycan biosynthesis class X pr   | PIGX     | Homo sapiens (Human) | Reviewed(Swiss-Prot) |                                            |
| Q8TCT1 | 162466 | has162466 | Phosphoethanolamine/phosphocholine phosphatase        | PHOSPHO1 | Homo sapiens (Human) | Reviewed(Swiss-Prot) | Hydrolase                                  |
| Q8TD30 | 84706  | has84706  | Alanine aminotransferase 2                            | GPT2     | Homo sapiens (Human) | Reviewed(Swiss-Prot) | Aminotransferase, Transferase              |
| Q8TDN7 | 125981 | has125981 | Alkaline ceramidase 1                                 | ACER1    | Homo sapiens (Human) | Reviewed(Swiss-Prot) | Hydrolase                                  |
| Q8TEQ8 | 84720  | has84720  | GPI ethanolamine phosphate transferase 3              | PIGO     | Homo sapiens (Human) | Reviewed(Swiss-Prot) | Transferase                                |
| Q8TET4 | 2595   | has2595   | Neutral alpha-glucosidase C                           | GANC     | Homo sapiens (Human) | Reviewed(Swiss-Prot) | Glycosidase, Hydrolase                     |
| Q8TF71 | 117247 | has117247 | Monocarboxylate transporter 10                        | SLC16A10 | Homo sapiens (Human) | Reviewed(Swiss-Prot) | Amino acid transmembrane transport         |
| Q8WU0: | 219970 | has219970 | Glycine N-acyltransferase-like protein 2              | GLYATL2  | Homo sapiens (Human) | Reviewed(Swiss-Prot) | Acyltransferase, Transferase               |
| Q8WWI: | 23446  | has23446  | Choline transporter-like protein 1                    | SLC44A1  | Homo sapiens (Human) | Reviewed(Swiss-Prot) | Choline transmembrane transporter activity |
| Q8WXW8 |        |           | Urea transporter JK glycoprotein                      | JK       | Homo sapiens (Human) | Reviewed(Swiss-Prot) | Urea transmembrane transporter activity    |
| Q92521 | 9488   | has9488   | GPI mannosyltransferase 3                             | PIGB     | Homo sapiens (Human) | Reviewed(Swiss-Prot) | Glycosyltransferase, Transferase           |
| Q92535 | 5279   | has5279   | Phosphatidylinositol N-acetylglucosaminyltransferase  | PIGC     | Homo sapiens (Human) | Reviewed(Swiss-Prot) | Glycosyltransferase, Transferase           |
| Q92643 | 10026  | has10026  | GPI-anchor transamidase                               | PIGK     | Homo sapiens (Human) | Reviewed(Swiss-Prot) | Hydrolase, Protease, Thiol protease        |
| Q93088 | 635    | has635    | Betaine--homocysteine S-methyltransferase 1           | BHMT     | Homo sapiens (Human) | Reviewed(Swiss-Prot) | Methyltransferase, Transferase             |
| Q969I3 | 92292  | has92292  | Glycine N-acyltransferase-like protein 1              | GLYATL1  | Homo sapiens (Human) | Reviewed(Swiss-Prot) | Acyltransferase, Transferase               |
| Q969N2 | 51604  | has51604  | GPI transamidase component PIG-T                      | PIGT     | Homo sapiens (Human) | Reviewed(Swiss-Prot) | GPI-anchor transamidase activity           |
| Q96AD5 | 57104  | has57104  | Patatin-like phospholipase domain-containing protein  | PNPLA2   | Homo sapiens (Human) | Reviewed(Swiss-Prot) | Hydrolase                                  |
| Q96BZ4 | 122618 | has122618 | Phospholipase D4                                      | PLD4     | Homo sapiens (Human) | Reviewed(Swiss-Prot) | Hydrolase                                  |
| Q96DG6 | 134147 | has134147 | Carboxymethylenebutenolidase homolog                  | CMBL     | Homo sapiens (Human) | Reviewed(Swiss-Prot) | Hydrolase                                  |
| Q96EN8 | 55034  | has55034  | Molybdenum cofactor sulfurase                         | MOCOS    | Homo sapiens (Human) | Reviewed(Swiss-Prot) | Molybdenum cofactor sulfurtransferase      |
| Q96HD9 | 91703  | has91703  | Aspartoacylase-2                                      | ACY3     | Homo sapiens (Human) | Reviewed(Swiss-Prot) | Hydrolase                                  |
| Q96I15 | 51540  | has51540  | Selenocysteine lyase                                  | SCLY     | Homo sapiens (Human) | Reviewed(Swiss-Prot) | Lyase, Transferase                         |
| Q96JA3 | 84725  | has84725  | Pleckstrin homology domain-containing family A n      | PLEKHA8  | Homo sapiens (Human) | Reviewed(Swiss-Prot) | Ceramide binding                           |
| Q96KN2 | 84735  | has84735  | Beta-Ala-His dipeptidase                              | CNDP1    | Homo sapiens (Human) | Reviewed(Swiss-Prot) | Carboxypeptidase activity                  |
| Q96LB8 | 57115  | has57115  | Peptidoglycan recognition protein 4                   | PGLYRP4  | Homo sapiens (Human) | Reviewed(Swiss-Prot) | Antibiotic, Antimicrobial                  |
| Q96LB9 | 114771 | has114771 | Peptidoglycan recognition protein 3                   | PGLYRP3  | Homo sapiens (Human) | Reviewed(Swiss-Prot) | Antibiotic, Antimicrobial                  |
| Q96PD5 | 114770 | has114770 | N-acetylmuramoyl-L-alanine amidase                    | PGLYRP2  | Homo sapiens (Human) | Reviewed(Swiss-Prot) | N-acetylmuramoyl-L-alanine amidase         |
| Q96PF1 | 116179 | has116179 | Protein-glutamine gamma-glutamyltransferase Z         | TGM7     | Homo sapiens (Human) | Reviewed(Swiss-Prot) | Acyltransferase, Transferase               |

|        |        |           |                                                       |            |                      |                      |                                      |
|--------|--------|-----------|-------------------------------------------------------|------------|----------------------|----------------------|--------------------------------------|
| Q96RQ9 | 259307 | has259307 | L-amino-acid oxidase                                  | IL4I1      | Homo sapiens (Human) | Reviewed(Swiss-Prot) | Oxidoreductase                       |
| Q96RQ9 | 259307 | has259307 | L-amino-acid oxidase                                  | IL4I1      | Homo sapiens (Human) | Reviewed(Swiss-Prot) | Oxidoreductase                       |
| Q96S52 | 94005  | has94005  | GPI transamidase component PIG-S                      | PIGS       | Homo sapiens (Human) | Reviewed(Swiss-Prot) | GPI-anchor transamidase activity     |
| Q99487 | 5051   | has5051   | Platelet-activating factor acetylhydrolase 2, cytopla | PAFAH2     | Homo sapiens (Human) | Reviewed(Swiss-Prot) | Hydrolase                            |
| Q99518 | 2327   | has2327   | Dimethylaniline monooxygenase [N-oxide-forming        | FMO2       | Homo sapiens (Human) | Reviewed(Swiss-Prot) | Monooxygenase, Oxidoreductase        |
| Q99624 | 10991  | has10991  | Sodium-coupled neutral amino acid transporter 3       | SLC38A3    | Homo sapiens (Human) | Reviewed(Swiss-Prot) | Amino acid transmembrane transport   |
| Q99624 | 10991  | has10991  | Sodium-coupled neutral amino acid transporter 3       | SLC38A3    | Homo sapiens (Human) | Reviewed(Swiss-Prot) | Amino acid transmembrane transport   |
| Q99798 | 50     | has50     | Aconitate hydratase, mitochondrial                    | ACO2       | Homo sapiens (Human) | Reviewed(Swiss-Prot) |                                      |
| Q9BRB3 | 9091   | has9091   | Phosphatidylinositol N-acetylglucosaminyltransferase  | PIGQ       | Homo sapiens (Human) | Reviewed(Swiss-Prot) | Glycosyltransferase, Transferase     |
| Q9BRR6 | 83440  | has83440  | ADP-dependent glucokinase                             | ADPGK      | Homo sapiens (Human) | Reviewed(Swiss-Prot) | Kinase, Transferase                  |
| Q9BSE5 | 79814  | has79814  | Agmatinase, mitochondrial                             | AGMAT      | Homo sapiens (Human) | Reviewed(Swiss-Prot) | Hydrolase                            |
| Q9BUM  | 92579  | has92579  | Glucose-6-phosphatase 3                               | G6PC3      | Homo sapiens (Human) | Reviewed(Swiss-Prot) | Hydrolase                            |
| Q9BX93 | 84647  | has84647  | Group XIIB secretory phospholipase A2-like protei     | PLA2G12B   | Homo sapiens (Human) | Reviewed(Swiss-Prot) | Calcium ion binding                  |
| Q9BY32 | 3704   | has3704   | Inosine triphosphate pyrophosphatase                  | ITPA       | Homo sapiens (Human) | Reviewed(Swiss-Prot) | Hydrolase                            |
| Q9BYF1 | 59272  | has59272  | Angiotensin-converting enzyme 2                       | ACE2       | Homo sapiens (Human) | Reviewed(Swiss-Prot) | Carboxypeptidase, Host cell receptor |
| Q9BYG0 | 84002  | has84002  | Lactosylceramide 1,3-N-acetyl-beta-D-glucosaminy      | B3GNT5     | Homo sapiens (Human) | Reviewed(Swiss-Prot) | Developmental protein, Glycosyltran  |
| Q9BYV1 | 64902  | has64902  | Alanine--glyoxylate aminotransferase 2, mitochond     | AGXT2      | Homo sapiens (Human) | Reviewed(Swiss-Prot) | Aminotransferase, Transferase        |
| Q9BYV1 | 64902  | has64902  | Alanine--glyoxylate aminotransferase 2, mitochond     | AGXT2      | Homo sapiens (Human) | Reviewed(Swiss-Prot) | Aminotransferase, Transferase        |
| Q9BYZ2 | 92483  | has92483  | L-lactate dehydrogenase A-like 6B                     | LDHAL6B    | Homo sapiens (Human) | Reviewed(Swiss-Prot) | Oxidoreductase                       |
| Q9BZM  | 81579  | has81579  | Group XIIA secretory phospholipase A2                 | PLA2G12A   | Homo sapiens (Human) | Reviewed(Swiss-Prot) | Hydrolase                            |
| Q9BZM  | 64600  | has64600  | Group IIF secretory phospholipase A2                  | PLA2G2F    | Homo sapiens (Human) | Reviewed(Swiss-Prot) | Hydrolase                            |
| Q9BZX2 | 7371   | has7371   | Uridine-cytidine kinase 2                             | UCK2       | Homo sapiens (Human) | Reviewed(Swiss-Prot) | Kinase, Transferase                  |
| Q9GZU7 | 58190  | has58190  | Carboxy-terminal domain RNA polymerase II poly        | CTDSP1     | Homo sapiens (Human) | Reviewed(Swiss-Prot) | Hydrolase, Protein phosphatase       |
| Q9GZV3 | 60482  | has60482  | High affinity choline transporter 1                   | SLC5A7     | Homo sapiens (Human) | Reviewed(Swiss-Prot) | Choline transmembrane transporter a  |
| Q9H0R6 | 55278  | has55278  | Glutamyl-tRNA(Gln) amidotransferase subunit A, r      | QRSL1      | Homo sapiens (Human) | Reviewed(Swiss-Prot) | Ligase                               |
| Q9H227 | 57733  | has57733  | Cytosolic beta-glucosidase                            | GBA3       | Homo sapiens (Human) | Reviewed(Swiss-Prot) | Glycosidase, Hydrolase               |
| Q9H3S5 | 93183  | has93183  | GPI mannosyltransferase 1                             | PIGM       | Homo sapiens (Human) | Reviewed(Swiss-Prot) | Glycosyltransferase, Transferase     |
| Q9H490 | 128869 | has128869 | Phosphatidylinositol glycan anchor biosynthesis cla   | PIGU       | Homo sapiens (Human) | Reviewed(Swiss-Prot) |                                      |
| Q9H598 | 140679 | has140679 | Vesicular inhibitory amino acid transporter           | SLC32A1    | Homo sapiens (Human) | Reviewed(Swiss-Prot) | Amino acid transmembrane transport   |
| Q9HCG7 | 57704  | has57704  | Non-lysosomal glucosylceramidase                      | GBA2       | Homo sapiens (Human) | Reviewed(Swiss-Prot) | Glycosidase, Hydrolase               |
| Q9NP80 | 50640  | has50640  | Calcium-independent phospholipase A2-gamma            | PNPLA8     | Homo sapiens (Human) | Reviewed(Swiss-Prot) | Hydrolase                            |
| Q9NPB8 | 56261  | has56261  | Glycerophosphocholine phosphodiesterase GPCPD         | GPCPD1     | Homo sapiens (Human) | Reviewed(Swiss-Prot) | Hydrolase                            |
| Q9NQR5 | 57818  | has57818  | Glucose-6-phosphatase 2                               | G6PC2      | Homo sapiens (Human) | Reviewed(Swiss-Prot) | Hydrolase                            |
| Q9NR71 | 56624  | has56624  | Neutral ceramidase                                    | ASAH2      | Homo sapiens (Human) | Reviewed(Swiss-Prot) | Hydrolase                            |
| Q9NRF8 | 56474  | has56474  | CTP synthase 2                                        | CTPS2      | Homo sapiens (Human) | Reviewed(Swiss-Prot) | Ligase                               |
| Q9NSD9 | 10056  | has10056  | Phenylalanine--tRNA ligase beta subunit               | FARSB      | Homo sapiens (Human) | Reviewed(Swiss-Prot) | Aminoacyl-tRNA synthetase, Ligase    |
| Q9NST1 | 80339  | has80339  | Patatin-like phospholipase domain-containing prote    | PNPLA3     | Homo sapiens (Human) | Reviewed(Swiss-Prot) | Acyltransferase, Hydrolase, Transfer |
| Q9NUD9 | 55650  | has55650  | GPI mannosyltransferase 2                             | PIGV       | Homo sapiens (Human) | Reviewed(Swiss-Prot) | Glycosyltransferase, Transferase     |
| Q9NV23 | 55301  | has55301  | S-acyl fatty acid synthase thioesterase, medium cha   | OLAH       | Homo sapiens (Human) | Reviewed(Swiss-Prot) | Hydrolase                            |
| Q9NZ20 | 50487  | has50487  | Group 3 secretory phospholipase A2                    | PLA2G3     | Homo sapiens (Human) | Reviewed(Swiss-Prot) | Hydrolase                            |
| Q9NZC3 | 51573  | has51573  | Glycerophosphodiester phosphodiesterase 1             | GDE1       | Homo sapiens (Human) | Reviewed(Swiss-Prot) | Hydrolase                            |
| Q9NZD2 | 51228  | has51228  | Glycolipid transfer protein                           | GLTP       | Homo sapiens (Human) | Reviewed(Swiss-Prot) | Glycolipid binding                   |
| Q9NZK7 | 30814  | has30814  | Group IIE secretory phospholipase A2                  | PLA2G2E    | Homo sapiens (Human) | Reviewed(Swiss-Prot) | Hydrolase                            |
| Q9P0Z9 | 51268  | has51268  | Peroxisomal sarcosine oxidase                         | PIPOX      | Homo sapiens (Human) | Reviewed(Swiss-Prot) | Oxidoreductase                       |
| Q9UEF6 |        |           | Peroxisome proliferator activated-receptor gamma      | ppar gamma | Homo sapiens (Human) | Unreviewed(TrEMBL)   | Receptor                             |
| Q9UFH6 |        |           | Putative uncharacterized protein DKFZp434L0435        | DKFZp4341  | Homo sapiens (Human) | Unreviewed(TrEMBL)   | Receptor                             |
| Q9UHI5 | 23428  | has23428  | Large neutral amino acids transporter small subunit   | SLC7A8     | Homo sapiens (Human) | Reviewed(Swiss-Prot) | Amino acid transmembrane transport   |
| Q9UHV1 | 29124  | has29124  | Galactoside-binding soluble lectin 13                 | LGALS13    | Homo sapiens (Human) | Reviewed(Swiss-Prot) | Carbohydrate binding                 |

|        |                |                                                    |          |                      |                      |                                     |
|--------|----------------|----------------------------------------------------|----------|----------------------|----------------------|-------------------------------------|
| Q9UI32 | 27165 has27165 | Glutaminase liver isoform, mitochondrial           | GLS2     | Homo sapiens (Human) | Reviewed(Swiss-Prot) | Hydrolase                           |
| Q9UL12 | 1757 has1757   | Sarcosine dehydrogenase, mitochondrial             | SARDH    | Homo sapiens (Human) | Reviewed(Swiss-Prot) | Oxidoreductase                      |
| Q9ULI2 | 57494 has57494 | Beta-citrylglutamate synthase B                    | RIMKLB   | Homo sapiens (Human) | Reviewed(Swiss-Prot) | Ligase                              |
| Q9UNK4 | 26279 has26279 | Group IID secretory phospholipase A2               | PLA2G2D  | Homo sapiens (Human) | Reviewed(Swiss-Prot) | Hydrolase                           |
| Q9UP65 | 8605 has8605   | Cytosolic phospholipase A2 gamma                   | PLA2G4C  | Homo sapiens (Human) | Reviewed(Swiss-Prot) | Hydrolase                           |
| Q9Y259 | 1120 has1120   | Choline/ethanolamine kinase                        | CHKB     | Homo sapiens (Human) | Reviewed(Swiss-Prot) | Kinase, Transferase                 |
| Q9Y285 | 2193 has2193   | Phenylalanine--tRNA ligase alpha subunit           | FARSA    | Homo sapiens (Human) | Reviewed(Swiss-Prot) | Aminoacyl-tRNA synthetase, Ligase   |
| Q9Y2B2 | 9487 has9487   | N-acetylglucosaminyl-phosphatidylinositol de-N-ac  | PIGL     | Homo sapiens (Human) | Reviewed(Swiss-Prot) | Hydrolase                           |
| Q9Y2C3 | 10317 has10317 | Beta-1,3-galactosyltransferase 5                   | B3GALT5  | Homo sapiens (Human) | Reviewed(Swiss-Prot) | Glycosyltransferase, Transferase    |
| Q9Y2P4 | 28965 has28965 | Long-chain fatty acid transport protein 6          | SLC27A6  | Homo sapiens (Human) | Reviewed(Swiss-Prot) | Ligase                              |
| Q9Y345 | 9152 has9152   | Sodium- and chloride-dependent glycine transporter | SLC6A5   | Homo sapiens (Human) | Reviewed(Swiss-Prot) | Glycine:sodium symporter activity   |
| Q9Y5K3 | 9468 has9468   | Choline-phosphate cytidyltransferase B             | PCYT1B   | Homo sapiens (Human) | Reviewed(Swiss-Prot) | Nucleotidyltransferase, Transferase |
| Q9Y5X9 | 9388 has9388   | Endothelial lipase                                 | LIPG     | Homo sapiens (Human) | Reviewed(Swiss-Prot) | Heparin-binding, Hydrolase          |
| Q9Y663 | 9955 has9955   | Heparan sulfate glucosamine 3-O-sulfotransferase 3 | HS3ST3A1 | Homo sapiens (Human) | Reviewed(Swiss-Prot) | Transferase                         |
| Q9Y697 | 9054 has9054   | Cysteine desulfurase, mitochondrial                | NFS1     | Homo sapiens (Human) | Reviewed(Swiss-Prot) | Transferase                         |
| Q9Y6K0 | 10390 has10390 | Choline/ethanolaminephosphotransferase 1           | CEPT1    | Homo sapiens (Human) | Reviewed(Swiss-Prot) | Transferase                         |

**Supplementary Table S5. The docking score between metabonomic biomarker and target calculate by systemsDock**

| Uniprot ID | PDB  | Biomaker    | Docking Scores (pKd/pKi) |
|------------|------|-------------|--------------------------|
| P04150     | 1P93 | HMDB0004610 | 7.628                    |
| P01116     | 1N4R | HMDB0004610 | 7.618                    |
| P21359     | 2D4Q | HMDB0004610 | 7.563                    |
| P68871     | 1BAB | HMDB0004610 | 7.446                    |
| P36551     | 2AEX | HMDB0004610 | 7.41                     |
| P14902     | 2D0T | HMDB0004610 | 7.401                    |
| P21397     | 2Z5Y | HMDB0010393 | 7.401                    |
| P27338     | 1OJA | HMDB0010396 | 7.38                     |
| P21397     | 2Z5Y | HMDB0010396 | 7.38                     |
| P27338     | 1OJA | HMDB0010393 | 7.376                    |
| P28329     | 2FY3 | HMDB0004610 | 7.375                    |
| P21397     | 2Z5Y | HMDB0004610 | 7.356                    |
| P01308     | 1EVR | HMDB0004610 | 7.353                    |
| P51659     | 1IKT | HMDB0004610 | 7.353                    |
| P02768     | 1E7A | HMDB0004610 | 7.329                    |
| P42345     | 4FAP | HMDB0004610 | 7.324                    |
| P04271     | 2H61 | HMDB0004610 | 7.32                     |
| P04278     | 1LHV | HMDB0004610 | 7.302                    |
| P21802     | 1DJS | HMDB0004610 | 7.292                    |
| P21397     | 2Z5Y | HMDB0010384 | 7.283                    |
| P02741     | 1CGP | HMDB0004610 | 7.274                    |
| Q08499     | 1MKD | HMDB0004610 | 7.274                    |
| P01270     | 3C4M | HMDB0004610 | 7.27                     |
| P27338     | 1OJA | HMDB0004610 | 7.242                    |
| Q30201     | 1DEA | HMDB0004610 | 7.232                    |
| Q15067     | 1W07 | HMDB0004610 | 7.209                    |
| P12821     | 1UZE | HMDB0004610 | 7.199                    |
| Q9Y617     | 3E77 | HMDB0010393 | 7.183                    |
| P00441     | 1HL5 | HMDB0004610 | 7.17                     |
| Q9Y617     | 3E77 | HMDB0004610 | 7.154                    |
| Q99259     | 2OKJ | HMDB0010396 | 7.147                    |
| P01375     | 2AZ5 | HMDB0004610 | 7.128                    |
| P07949     | 2IVS | HMDB0004610 | 7.124                    |
| P28482     | 1PME | HMDB0004610 | 7.115                    |
| Q9Y617     | 3E77 | HMDB0010396 | 7.111                    |
| Q99259     | 2OKJ | HMDB0010393 | 7.088                    |
| P21964     | 3HVH | HMDB0004610 | 7.082                    |
| Q9BYW2     | 3H6L | HMDB0004610 | 7.06                     |
| P30793     | 1N3T | HMDB0004610 | 7.053                    |
| P14416     | 2HLB | HMDB0004610 | 7.049                    |
| P42336     | 3HHM | HMDB0004610 | 7.032                    |
| Q08499     | 1MKD | HMDB0010393 | 7.023                    |
| P16278     | 1BOB | HMDB0004610 | 7.017                    |
| P21397     | 2Z5Y | HMDB0010383 | 6.996                    |
| P01138     | 1SG1 | HMDB0004610 | 6.988                    |
| Q08499     | 1MKD | HMDB0010396 | 6.987                    |
| P12821     | 1UZE | HMDB0010396 | 6.979                    |
| P17612     | 3MVJ | HMDB0010393 | 6.955                    |
| Q9Y617     | 3E77 | HMDB0010384 | 6.947                    |
| P08397     | 3ECR | HMDB0004610 | 6.944                    |
| P36551     | 2AEX | HMDB0010393 | 6.941                    |
| P17612     | 3MVJ | HMDB0010396 | 6.936                    |
| P36551     | 2AEX | HMDB0010396 | 6.927                    |
| P28329     | 2FY3 | HMDB0010384 | 6.922                    |
| P12821     | 1UZE | HMDB0010393 | 6.913                    |
| Q15067     | 1W07 | HMDB0010393 | 6.913                    |
| P27338     | 1OJA | HMDB0010383 | 6.907                    |
| P01116     | 1N4R | HMDB0010393 | 6.903                    |
| P36551     | 2AEX | HMDB0010384 | 6.903                    |
| P28329     | 2FY3 | HMDB0010393 | 6.901                    |
| P28329     | 2FY3 | HMDB0010396 | 6.886                    |
| P00441     | 1HL5 | HMDB0010393 | 6.877                    |
| P02768     | 1E7A | HMDB0010396 | 6.876                    |
| P01116     | 1N4R | HMDB0010396 | 6.876                    |
| P00441     | 1HL5 | HMDB0010384 | 6.873                    |
| P04278     | 1LHV | HMDB0010396 | 6.873                    |



|        |      |             |       |
|--------|------|-------------|-------|
| Q9BYW2 | 3H6L | HMDB0010396 | 6.862 |
| Q99259 | 2OKJ | HMDB0010384 | 6.861 |
| P01579 | 1EKU | HMDB0010396 | 6.85  |
| P02768 | 1E7A | HMDB0010393 | 6.845 |
| P01138 | 1SG1 | HMDB0010393 | 6.838 |
| P43354 | 1OVL | HMDB0004610 | 6.836 |
| Q8NFD5 | 2EH9 | HMDB0004610 | 6.826 |
| P02741 | 1CGP | HMDB0010393 | 6.824 |
| P04278 | 1LHV | HMDB0010393 | 6.822 |
| Q15067 | 1W07 | HMDB0010396 | 6.818 |
| Q06124 | 2SHP | HMDB0010393 | 6.818 |
| Q06124 | 2SHP | HMDB0010396 | 6.814 |
| P01579 | 1EKU | HMDB0010393 | 6.797 |
| P02741 | 1CGP | HMDB0010396 | 6.789 |
| P01138 | 1SG1 | HMDB0010396 | 6.775 |
| P02741 | 1CGP | HMDB0000099 | 6.767 |
| P00441 | 1HL5 | HMDB0010396 | 6.765 |
| P17612 | 3MVJ | HMDB0010384 | 6.761 |
| P28329 | 2FY3 | HMDB0010383 | 6.756 |
| P42336 | 3HHM | HMDB0010396 | 6.751 |
| Q9BYW2 | 3H6L | HMDB0010393 | 6.749 |
| P01116 | 1N4R | HMDB0010384 | 6.747 |
| P08397 | 3ECR | HMDB0010396 | 6.73  |
| P36551 | 2AEX | HMDB0010383 | 6.725 |
| P12821 | 1UZE | HMDB0010384 | 6.712 |
| P04150 | 1P93 | HMDB0034146 | 6.703 |
| P02768 | 1E7A | HMDB0010384 | 6.702 |
| P21397 | 2Z5Y | HMDB0000883 | 6.702 |
| P02741 | 1CGP | HMDB0010384 | 6.698 |
| P21397 | 2Z5Y | HMDB0000099 | 6.683 |
| P14416 | 2HLB | HMDB0010396 | 6.682 |
| Q08499 | 1MKD | HMDB0010384 | 6.681 |
| P23771 | 3DFV | HMDB0004610 | 6.68  |
| P01270 | 3C4M | HMDB0010396 | 6.679 |
| P01116 | 1N4R | HMDB0034146 | 6.677 |
| P00441 | 1HL5 | HMDB0010383 | 6.668 |
| P27338 | 1OJA | HMDB0000099 | 6.668 |
| P05067 | 2FK3 | HMDB0004610 | 6.666 |
| P14416 | 2HLB | HMDB0010393 | 6.666 |
| P42336 | 3HHM | HMDB0010393 | 6.662 |
| Q06124 | 2SHP | HMDB0010384 | 6.661 |
| P08397 | 3ECR | HMDB0010393 | 6.656 |
| P01308 | 1EVR | HMDB0010393 | 6.648 |
| P62834 | 3KUC | HMDB0010393 | 6.643 |
| P01308 | 1EVR | HMDB0010396 | 6.642 |
| P21802 | 1DJS | HMDB0010393 | 6.641 |
| P21802 | 1DJS | HMDB0010396 | 6.64  |
| P04271 | 2H61 | HMDB0010396 | 6.638 |
| P07949 | 2IVS | HMDB0010383 | 6.634 |
| Q30201 | 1DEA | HMDB0010393 | 6.629 |
| P04150 | 1P93 | HMDB0010384 | 6.628 |
| Q03431 | 3L2J | HMDB0010393 | 6.627 |
| P21359 | 2D4Q | HMDB0010384 | 6.626 |
| P62834 | 3KUC | HMDB0010396 | 6.621 |
| P01138 | 1SG1 | HMDB0010384 | 6.619 |
| P04278 | 1LHV | HMDB0000099 | 6.618 |
| P04150 | 1P93 | HMDB0010393 | 6.618 |
| Q99259 | 2OKJ | HMDB0010383 | 6.616 |
| P10082 | 2ZA5 | HMDB0004610 | 6.613 |
| P12821 | 1UZE | HMDB0000099 | 6.608 |
| P14416 | 2HLB | HMDB0010384 | 6.608 |
| P21359 | 2D4Q | HMDB0010393 | 6.605 |
| P21359 | 2D4Q | HMDB0010383 | 6.603 |
| P21359 | 2D4Q | HMDB0010396 | 6.595 |
| P43354 | 1OVL | HMDB0010384 | 6.593 |
| P04271 | 2H61 | HMDB0010393 | 6.586 |
| P01116 | 1N4R | HMDB0010383 | 6.58  |
| P04150 | 1P93 | HMDB0010396 | 6.579 |
| P27361 | 3FXW | HMDB0010396 | 6.575 |

|        |      |             |       |
|--------|------|-------------|-------|
| P10082 | 2ZA5 | HMDB0010393 | 6.574 |
| P54098 | 1A1V | HMDB0010396 | 6.57  |
| Q08499 | 1MKD | HMDB0010383 | 6.567 |
| P12821 | 1UZE | HMDB0010383 | 6.566 |
| P54098 | 1A1V | HMDB0010393 | 6.565 |
| P29475 | 1F20 | HMDB0004610 | 6.563 |
| P02768 | 1E7A | HMDB0010383 | 6.556 |
| Q9Y617 | 3E77 | HMDB0010383 | 6.551 |
| P42345 | 4FAP | HMDB0010396 | 6.546 |
| Q15067 | 1W07 | HMDB0010384 | 6.542 |
| P01308 | 1EVR | HMDB0034146 | 6.541 |
| Q9BYW2 | 3H6L | HMDB0010384 | 6.54  |
| Q03431 | 3L2J | HMDB0010396 | 6.538 |
| P30793 | 1N3T | HMDB0010396 | 6.536 |
| P01308 | 1EVR | HMDB0010384 | 6.528 |
| Q30201 | 1DEA | HMDB0000099 | 6.521 |
| P43354 | 1OVL | HMDB0010393 | 6.517 |
| Q8NFD5 | 2EH9 | HMDB0010393 | 6.516 |
| P01112 | 1NVU | HMDB0004610 | 6.515 |
| P14902 | 2D0T | HMDB0010393 | 6.512 |
| P07949 | 2IVS | HMDB0010396 | 6.508 |
| P04278 | 1LHV | HMDB0010384 | 6.503 |
| P01270 | 3C4M | HMDB0010393 | 6.503 |
| P62834 | 3KUC | HMDB0010384 | 6.503 |
| P08069 | 3F5P | HMDB0010384 | 6.494 |
| P42345 | 4FAP | HMDB0010384 | 6.494 |
| P05067 | 2FK3 | HMDB0010393 | 6.488 |
| P15056 | 3II5 | HMDB0010384 | 6.483 |
| P15056 | 3II5 | HMDB0010396 | 6.482 |
| P08069 | 3F5P | HMDB0010393 | 6.481 |
| P01270 | 3C4M | HMDB0010384 | 6.48  |
| P02741 | 1CGP | HMDB0010383 | 6.475 |
| P30793 | 1N3T | HMDB0010393 | 6.469 |
| Q03431 | 3L2J | HMDB0010384 | 6.468 |
| P23771 | 3DFV | HMDB0034146 | 6.46  |
| P16435 | 3FJO | HMDB0004610 | 6.46  |
| P21397 | 2Z5Y | HMDB0034146 | 6.457 |
| P03372 | 1HCQ | HMDB0004610 | 6.456 |
| P01579 | 1EKU | HMDB0010383 | 6.455 |
| P07949 | 2IVS | HMDB0010393 | 6.454 |
| P03372 | 1HCQ | HMDB0034146 | 6.453 |
| Q9Y617 | 3E77 | HMDB0000099 | 6.447 |
| P62834 | 3KUC | HMDB0004610 | 6.444 |
| P04049 | 3CU8 | HMDB0010396 | 6.441 |
| P01308 | 1EVR | HMDB0010383 | 6.44  |
| P27338 | 1OJA | HMDB0034146 | 6.436 |
| Q02750 | 3EQC | HMDB0010396 | 6.436 |
| Q99259 | 2OKJ | HMDB0034146 | 6.435 |
| P51659 | 1IKT | HMDB0010393 | 6.434 |
| P04278 | 1LHV | HMDB0034146 | 6.434 |
| P04049 | 3CU8 | HMDB0010393 | 6.432 |
| P23771 | 3DFV | HMDB0010393 | 6.427 |
| P23771 | 3DFV | HMDB0010396 | 6.427 |
| P05067 | 2FK3 | HMDB0010396 | 6.424 |
| P15056 | 3II5 | HMDB0010393 | 6.423 |
| P42345 | 4FAP | HMDB0010393 | 6.422 |
| P27361 | 3FXW | HMDB0010383 | 6.418 |
| Q08499 | 1MKD | HMDB0000099 | 6.417 |
| P01270 | 3C4M | HMDB0034146 | 6.417 |
| P08069 | 3F5P | HMDB0034146 | 6.415 |
| P17612 | 3MVJ | HMDB0034146 | 6.413 |
| Q30201 | 1DEA | HMDB0010384 | 6.411 |
| P43354 | 1OVL | HMDB0010396 | 6.411 |
| P28482 | 1PME | HMDB0010396 | 6.411 |
| Q15067 | 1W07 | HMDB0034146 | 6.411 |
| P54098 | 1A1V | HMDB0010384 | 6.409 |
| P04049 | 3CU8 | HMDB0010384 | 6.403 |
| P27361 | 3FXW | HMDB0034146 | 6.403 |
| Q02750 | 3EQC | HMDB0010384 | 6.402 |

|        |      |             |       |
|--------|------|-------------|-------|
| P04150 | 1P93 | HMDB0010383 | 6.399 |
| P27361 | 3FXW | HMDB0010393 | 6.396 |
| P36551 | 2AEX | HMDB0034146 | 6.394 |
| P00441 | 1HL5 | HMDB0034146 | 6.393 |
| P08397 | 3ECR | HMDB0010384 | 6.393 |
| P07949 | 2IVS | HMDB0010384 | 6.39  |
| P21802 | 1DJS | HMDB0034146 | 6.385 |
| P01112 | 1NVU | HMDB0010396 | 6.383 |
| P05067 | 2FK3 | HMDB0010384 | 6.377 |
| P03372 | 1HCQ | HMDB0010396 | 6.375 |
| Q15067 | 1W07 | HMDB0010383 | 6.371 |
| P02768 | 1E7A | HMDB0034146 | 6.369 |
| P78509 | 2DDU | HMDB0010396 | 6.369 |
| P08397 | 3ECR | HMDB0010383 | 6.366 |
| P02787 | 1DAN | HMDB0004610 | 6.365 |
| Q03431 | 3L2J | HMDB0034146 | 6.365 |
| P30793 | 1N3T | HMDB0010384 | 6.364 |
| Q8NFD5 | 2EH9 | HMDB0010396 | 6.364 |
| P14416 | 2HLB | HMDB0010383 | 6.364 |
| P01112 | 1NVU | HMDB0010384 | 6.363 |
| P08069 | 3F5P | HMDB0010396 | 6.362 |
| P28329 | 2FY3 | HMDB0034146 | 6.357 |
| P01112 | 1NVU | HMDB0010393 | 6.355 |
| P01270 | 3C4M | HMDB0010383 | 6.354 |
| P02741 | 1CGP | HMDB0034146 | 6.352 |
| P28482 | 1PME | HMDB0034146 | 6.344 |
| P17612 | 3MVJ | HMDB0010383 | 6.344 |
| Q30201 | 1DEA | HMDB0034146 | 6.342 |
| Q02750 | 3EQC | HMDB0010383 | 6.339 |
| P68871 | 1BAB | HMDB0010393 | 6.338 |
| P27361 | 3FXW | HMDB0010384 | 6.338 |
| P02787 | 1DAN | HMDB0010396 | 6.337 |
| Q03431 | 3L2J | HMDB0010383 | 6.337 |
| P01112 | 1NVU | HMDB0010383 | 6.335 |
| P21964 | 3HVH | HMDB0010396 | 6.333 |
| Q06124 | 2SHP | HMDB0034146 | 6.332 |
| P03372 | 1HCQ | HMDB0010384 | 6.329 |
| P10082 | 2ZA5 | HMDB0010396 | 6.329 |
| Q9BYW2 | 3H6L | HMDB0034146 | 6.329 |
| P51659 | 1IKT | HMDB0010396 | 6.325 |
| Q02750 | 3EQC | HMDB0010393 | 6.325 |
| P28482 | 1PME | HMDB0010393 | 6.324 |
| Q08499 | 1MKD | HMDB0034146 | 6.318 |
| P14416 | 2HLB | HMDB0034146 | 6.316 |
| P02787 | 1DAN | HMDB0010393 | 6.315 |
| P30793 | 1N3T | HMDB0034146 | 6.312 |
| P14902 | 2D0T | HMDB0010396 | 6.312 |
| Q02750 | 3EQC | HMDB0034146 | 6.312 |
| P35520 | 1M54 | HMDB0010393 | 6.307 |
| P10082 | 2ZA5 | HMDB0010384 | 6.302 |
| P21802 | 1DJS | HMDB0010384 | 6.298 |
| P42336 | 3HHM | HMDB0034146 | 6.296 |
| Q9Y617 | 3E77 | HMDB0034146 | 6.293 |
| P51659 | 1IKT | HMDB0034146 | 6.291 |
| P54098 | 1A1V | HMDB0010383 | 6.288 |
| P08397 | 3ECR | HMDB0034146 | 6.287 |
| P68871 | 1BAB | HMDB0034146 | 6.286 |
| P15056 | 3II5 | HMDB0034146 | 6.285 |
| P14902 | 2D0T | HMDB0034146 | 6.283 |
| P23771 | 3DFV | HMDB0010384 | 6.276 |
| P60484 | 1D5R | HMDB0004610 | 6.273 |
| P21802 | 1DJS | HMDB0010383 | 6.27  |
| P35637 | 1G5G | HMDB0010393 | 6.269 |
| P04278 | 1LHV | HMDB0010383 | 6.268 |
| P68871 | 1BAB | HMDB0010396 | 6.265 |
| P21964 | 3HVH | HMDB0034146 | 6.262 |
| P14902 | 2D0T | HMDB0010384 | 6.258 |
| P54098 | 1A1V | HMDB0004610 | 6.257 |
| Q9Y243 | 2X18 | HMDB0004610 | 6.248 |

|        |      |             |       |
|--------|------|-------------|-------|
| P35637 | 1G5G | HMDB0010396 | 6.247 |
| P03372 | 1HCQ | HMDB0010393 | 6.247 |
| Q30201 | 1DEA | HMDB0010396 | 6.246 |
| P01138 | 1SG1 | HMDB0034146 | 6.246 |
| Q06124 | 2SHP | HMDB0000099 | 6.242 |
| P12821 | 1UZE | HMDB0034146 | 6.229 |
| P11274 | 1K1F | HMDB0004610 | 6.223 |
| Q06124 | 2SHP | HMDB0004610 | 6.223 |
| P21964 | 3HVH | HMDB0010384 | 6.223 |
| P35520 | 1M54 | HMDB0010396 | 6.218 |
| P21964 | 3HVH | HMDB0010393 | 6.217 |
| P35520 | 1M54 | HMDB0034146 | 6.214 |
| P35520 | 1M54 | HMDB0010384 | 6.202 |
| P01589 | 3IU3 | HMDB0010393 | 6.202 |
| Q13255 | 1EWT | HMDB0010396 | 6.197 |
| P01920 | 1UVQ | HMDB0010396 | 6.19  |
| P27487 | 1W1I | HMDB0010393 | 6.189 |
| P04271 | 2H61 | HMDB0010384 | 6.186 |
| P01920 | 1UVQ | HMDB0010384 | 6.185 |
| P01920 | 1UVQ | HMDB0010383 | 6.183 |
| P15289 | 2AIJ | HMDB0010396 | 6.182 |
| P28482 | 1PME | HMDB0010384 | 6.181 |
| P01920 | 1UVQ | HMDB0010393 | 6.181 |
| P01241 | 1AXI | HMDB0010393 | 6.18  |
| P10912 | 1AXI | HMDB0010393 | 6.18  |
| P15056 | 3II5 | HMDB0010383 | 6.18  |
| P15289 | 2AIJ | HMDB0010384 | 6.179 |
| P15289 | 2AIJ | HMDB0010393 | 6.179 |
| P22301 | 2ILK | HMDB0010396 | 6.179 |
| P11362 | 1CVS | HMDB0000294 | 6.175 |
| Q13936 | 1T0J | HMDB0010384 | 6.174 |
| Q13936 | 1T0J | HMDB0010393 | 6.173 |
| P01589 | 3IU3 | HMDB0010396 | 6.169 |
| P51608 | 3C2I | HMDB0010393 | 6.168 |
| Q30201 | 1DEA | HMDB0010383 | 6.167 |
| P51659 | 1IKT | HMDB0010384 | 6.166 |
| P07949 | 2IVS | HMDB0000099 | 6.166 |
| Q13936 | 1T0J | HMDB0010396 | 6.165 |
| P01138 | 1SG1 | HMDB0010383 | 6.163 |
| P08069 | 3F5P | HMDB0010383 | 6.151 |
| Q13255 | 1EWT | HMDB0010384 | 6.146 |
| Q13936 | 1T0J | HMDB0010383 | 6.146 |
| P42336 | 3HHM | HMDB0010384 | 6.144 |
| P15289 | 2AIJ | HMDB0010383 | 6.143 |
| Q16620 | 1HCF | HMDB0000294 | 6.137 |
| P04049 | 3CU8 | HMDB0010383 | 6.137 |
| P35520 | 1M54 | HMDB0004610 | 6.131 |
| P21359 | 2D4Q | HMDB0034146 | 6.131 |
| P04271 | 2H61 | HMDB0034146 | 6.129 |
| Q99700 | 3KTR | HMDB0010396 | 6.128 |
| P54098 | 1A1V | HMDB0034146 | 6.127 |
| Q8NFD5 | 2EH9 | HMDB0010384 | 6.127 |
| P22301 | 2ILK | HMDB0010383 | 6.126 |
| P22301 | 2ILK | HMDB0010393 | 6.126 |
| P22301 | 2ILK | HMDB0010384 | 6.121 |
| P07949 | 2IVS | HMDB0034146 | 6.111 |
| P05019 | 1H02 | HMDB0010396 | 6.109 |
| P68871 | 1BAB | HMDB0010384 | 6.102 |
| P05231 | 1ALU | HMDB0000294 | 6.1   |
| P35520 | 1M54 | HMDB0000294 | 6.095 |
| P23771 | 3DFV | HMDB0010383 | 6.092 |
| P30793 | 1N3T | HMDB0010383 | 6.088 |
| P21333 | 2WFN | HMDB0000294 | 6.085 |
| P29475 | 1F20 | HMDB0000294 | 6.08  |
| P01584 | 2NVH | HMDB0000294 | 6.077 |
| Q9BYW2 | 3H6L | HMDB0010383 | 6.077 |
| P28482 | 1PME | HMDB0010383 | 6.075 |
| P14902 | 2D0T | HMDB0010383 | 6.072 |
| P04637 | 1GZH | HMDB0010396 | 6.062 |

|        |      |             |       |
|--------|------|-------------|-------|
| P39905 | 2V5E | HMDB0000294 | 6.057 |
| P01589 | 3IU3 | HMDB0010383 | 6.052 |
| P10145 | 1QE6 | HMDB0010396 | 6.051 |
| P43354 | 1OVL | HMDB0010383 | 6.048 |
| P36551 | 2AEX | HMDB0000161 | 6.047 |
| Q15465 | 3M1N | HMDB0010384 | 6.037 |
| P35520 | 1M54 | HMDB0010383 | 6.034 |
| Q06787 | 2QND | HMDB0010393 | 6.033 |
| Q15465 | 3M1N | HMDB0010396 | 6.033 |
| P51659 | 1IKT | HMDB0010383 | 6.03  |
| P05067 | 2FK3 | HMDB0034146 | 6.029 |
| P16278 | 1BOB | HMDB0000294 | 6.019 |
| P01308 | 1EVR | HMDB0000099 | 6.016 |
| P16435 | 3FJO | HMDB0010396 | 6.01  |
| P01589 | 3IU3 | HMDB0010384 | 6.01  |
| Q9Y243 | 2X18 | HMDB0010396 | 6.008 |
| Q99497 | 1PDW | HMDB0000294 | 6.006 |
| P03372 | 1HCQ | HMDB0010383 | 6.003 |
| P04637 | 1GZH | HMDB0000294 | 5.999 |
| Q9Y243 | 2X18 | HMDB0000294 | 5.996 |
| Q9Y243 | 2X18 | HMDB0010393 | 5.992 |
| Q8NER1 | 2NYJ | HMDB0000294 | 5.99  |
| P41159 | 3IIQ | HMDB0000294 | 5.99  |
| P01579 | 1EKU | HMDB0000294 | 5.986 |
| Q9NQC3 | 1OZN | HMDB0010393 | 5.986 |
| P01911 | 2WBJ | HMDB0000294 | 5.986 |
| Q15465 | 3M1N | HMDB0000294 | 5.986 |
| P16278 | 1BOB | HMDB0010393 | 5.982 |
| P27487 | 1W1I | HMDB0000294 | 5.979 |
| Q9Y243 | 2X18 | HMDB0010383 | 5.978 |
| Q9UBP0 | 3B9P | HMDB0010396 | 5.977 |
| P04049 | 3CU8 | HMDB0034146 | 5.977 |
| P51608 | 3C2I | HMDB0010384 | 5.974 |
| Q06787 | 2QND | HMDB0010396 | 5.969 |
| P10145 | 1QE6 | HMDB0010393 | 5.968 |
| P14902 | 2D0T | HMDB0000294 | 5.961 |
| P02741 | 1CGP | HMDB0000161 | 5.96  |
| P10082 | 2ZA5 | HMDB0034146 | 5.96  |
| P15056 | 3II5 | HMDB0000294 | 5.959 |
| P04062 | 2NT0 | HMDB0000294 | 5.956 |
| Q99259 | 2OKJ | HMDB0000161 | 5.953 |
| P78509 | 2DDU | HMDB0010384 | 5.951 |
| P68871 | 1BAB | HMDB0000294 | 5.948 |
| Q13255 | 1EWT | HMDB0010383 | 5.943 |
| P60484 | 1D5R | HMDB0010393 | 5.939 |
| P02741 | 1CGP | HMDB0000294 | 5.938 |
| P60484 | 1D5R | HMDB0010396 | 5.933 |
| O00555 | 3BXX | HMDB0000294 | 5.933 |
| P42336 | 3HHM | HMDB0010383 | 5.933 |
| Q43612 | 1UV0 | HMDB0000294 | 5.932 |
| Q06124 | 2SHP | HMDB0000161 | 5.931 |
| P06280 | 3HG3 | HMDB0010393 | 5.931 |
| P16435 | 3FJO | HMDB0010393 | 5.93  |
| P01303 | 1R9N | HMDB0000294 | 5.929 |
| P31749 | 2UZS | HMDB0000294 | 5.928 |
| Q03431 | 3L2J | HMDB0000294 | 5.923 |
| Q9Y2R2 | 2P6X | HMDB0010393 | 5.919 |
| P00450 | 2J5W | HMDB0000294 | 5.918 |
| P09619 | 1GQ5 | HMDB0000294 | 5.914 |
| Q13255 | 1EWT | HMDB0010393 | 5.909 |
| P17612 | 3MVJ | HMDB0000161 | 5.908 |
| Q06124 | 2SHP | HMDB0000294 | 5.907 |
| P21359 | 2D4Q | HMDB0000294 | 5.906 |
| P35637 | 1G5G | HMDB0000294 | 5.905 |
| P42345 | 4FAP | HMDB0034146 | 5.905 |
| P01375 | 2AZ5 | HMDB0034146 | 5.904 |
| P06280 | 3HG3 | HMDB0010396 | 5.904 |
| P05019 | 1H02 | HMDB0010393 | 5.903 |
| Q99259 | 2OKJ | HMDB0000294 | 5.901 |

|        |      |             |       |
|--------|------|-------------|-------|
| P42345 | 4FAP | HMDB0010383 | 5.899 |
| P43354 | 1OVL | HMDB0000294 | 5.896 |
| P01270 | 3C4M | HMDB0000294 | 5.895 |
| P14416 | 2HLB | HMDB0000294 | 5.891 |
| P29475 | 1F20 | HMDB0010393 | 5.89  |
| P01241 | 1AXI | HMDB0010396 | 5.885 |
| P10912 | 1AXI | HMDB0010396 | 5.885 |
| P27487 | 1W1I | HMDB0010396 | 5.884 |
| Q9Y2R2 | 2P6X | HMDB0000294 | 5.883 |
| P08833 | 1ZT3 | HMDB0000294 | 5.882 |
| Q15067 | 1W07 | HMDB0000294 | 5.879 |
| P04278 | 1LHV | HMDB0000294 | 5.878 |
| P01241 | 1AXI | HMDB0010384 | 5.876 |
| P10912 | 1AXI | HMDB0010384 | 5.876 |
| P16278 | 1BOB | HMDB0010384 | 5.876 |
| P29475 | 1F20 | HMDB0010396 | 5.873 |
| P62834 | 3KUC | HMDB0000294 | 5.873 |
| P02787 | 1DAN | HMDB0034146 | 5.871 |
| P26358 | 3EPZ | HMDB0000294 | 5.871 |
| Q9UBK2 | 1XB7 | HMDB0000294 | 5.869 |
| P01375 | 2AZ5 | HMDB0010396 | 5.869 |
| P04637 | 1GZH | HMDB0010393 | 5.868 |
| Q8NFD5 | 2EH9 | HMDB0000294 | 5.868 |
| P42858 | 3IO4 | HMDB0000294 | 5.867 |
| Q9NQC3 | 1OZN | HMDB0000294 | 5.864 |
| P12821 | 1UZE | HMDB0000294 | 5.864 |
| Q9UBP0 | 3B9P | HMDB0010393 | 5.863 |
| Q9UBP0 | 3B9P | HMDB0000294 | 5.862 |
| P07949 | 2IVS | HMDB0000294 | 5.859 |
| P00441 | 1HL5 | HMDB0000099 | 5.858 |
| P36551 | 2AEX | HMDB0000294 | 5.858 |
| P30793 | 1N3T | HMDB0000099 | 5.857 |
| P04271 | 2H61 | HMDB0000294 | 5.854 |
| P06850 | 1MO1 | HMDB0010393 | 5.853 |
| P42858 | 3IO4 | HMDB0010393 | 5.851 |
| P51659 | 1IKT | HMDB0000294 | 5.846 |
| P10145 | 1QE6 | HMDB0010383 | 5.84  |
| P04049 | 3CU8 | HMDB0000294 | 5.84  |
| P68871 | 1BAB | HMDB0010383 | 5.838 |
| P04637 | 1GZH | HMDB0010384 | 5.837 |
| P08397 | 3ECR | HMDB0000294 | 5.837 |
| P06280 | 3HG3 | HMDB0010384 | 5.836 |
| Q14203 | 2HL5 | HMDB0010383 | 5.834 |
| P27986 | 1H9O | HMDB0000294 | 5.833 |
| P01270 | 3C4M | HMDB0000099 | 5.833 |
| P21802 | 1DJS | HMDB0000294 | 5.829 |
| P10082 | 2ZA5 | HMDB0010383 | 5.829 |
| P35637 | 1G5G | HMDB0010383 | 5.824 |
| Q15465 | 3M1N | HMDB0010393 | 5.824 |
| P78504 | 2VJ2 | HMDB0010396 | 5.821 |
| P10082 | 2ZA5 | HMDB0000294 | 5.821 |
| P01112 | 1NVU | HMDB0000294 | 5.82  |
| P06280 | 3HG3 | HMDB0010383 | 5.819 |
| P49917 | 3II6 | HMDB0004610 | 5.818 |
| P01112 | 1NVU | HMDB0034146 | 5.815 |
| Q9Y2R2 | 2P6X | HMDB0010383 | 5.814 |
| Q9Y243 | 2X18 | HMDB0010384 | 5.812 |
| Q7LG56 | 3HF1 | HMDB0000294 | 5.809 |
| Q15067 | 1W07 | HMDB0000161 | 5.808 |
| P06280 | 3HG3 | HMDB0000294 | 5.808 |
| P11274 | 1K1F | HMDB0000294 | 5.807 |
| P29475 | 1F20 | HMDB0010384 | 5.805 |
| P30793 | 1N3T | HMDB0000294 | 5.804 |
| P29475 | 1F20 | HMDB0010383 | 5.8   |
| P17612 | 3MVJ | HMDB0000294 | 5.8   |
| P16278 | 1BOB | HMDB0010396 | 5.797 |
| P28482 | 1PME | HMDB0000294 | 5.794 |
| P42345 | 4FAP | HMDB0000294 | 5.793 |
| Q15303 | 2AHX | HMDB0010384 | 5.792 |

|        |      |             |       |
|--------|------|-------------|-------|
| P06280 | 3HG3 | HMDB0004610 | 5.79  |
| P04271 | 2H61 | HMDB0010383 | 5.784 |
| P01584 | 2NVH | HMDB0010384 | 5.784 |
| P54098 | 1A1V | HMDB0000294 | 5.783 |
| P29475 | 1F20 | HMDB0034146 | 5.776 |
| P01375 | 2AZ5 | HMDB0010393 | 5.776 |
| P11274 | 1K1F | HMDB0010383 | 5.773 |
| P16435 | 3FJO | HMDB0010384 | 5.772 |
| Q30201 | 1DEA | HMDB0000294 | 5.771 |
| P27986 | 1H9O | HMDB0010383 | 5.771 |
| P60568 | 1PY2 | HMDB0000294 | 5.769 |
| P06850 | 1MO1 | HMDB0010383 | 5.764 |
| P26358 | 3EPZ | HMDB0010383 | 5.762 |
| P10145 | 1QE6 | HMDB0000294 | 5.761 |
| P27338 | 1OJA | HMDB0000159 | 5.758 |
| Q14203 | 2HL5 | HMDB0010396 | 5.758 |
| P21397 | 2Z5Y | HMDB0000294 | 5.758 |
| Q06787 | 2QND | HMDB0000294 | 5.757 |
| P05019 | 1H02 | HMDB0010383 | 5.756 |
| Q99700 | 3KTR | HMDB0010384 | 5.752 |
| P43354 | 1OVL | HMDB0034146 | 5.751 |
| Q9Y2R2 | 2P6X | HMDB0010396 | 5.751 |
| P62834 | 3KUC | HMDB0010383 | 5.749 |
| P01375 | 2AZ5 | HMDB0000294 | 5.746 |
| Q15303 | 2AHX | HMDB0010393 | 5.743 |
| P42336 | 3HHM | HMDB0000294 | 5.743 |
| P10145 | 1QE6 | HMDB0010384 | 5.742 |
| P11274 | 1K1F | HMDB0010396 | 5.739 |
| P05019 | 1H02 | HMDB0010384 | 5.738 |
| Q9BYW2 | 3H6L | HMDB0000294 | 5.733 |
| P51608 | 3C2I | HMDB0010396 | 5.732 |
| P55072 | 1Y8E | HMDB0010383 | 5.731 |
| P04062 | 2NT0 | HMDB0010396 | 5.731 |
| P60568 | 1PY2 | HMDB0010393 | 5.725 |
| P62834 | 3KUC | HMDB0034146 | 5.723 |
| Q08499 | 1MKD | HMDB0000294 | 5.717 |
| Q8NFD5 | 2EH9 | HMDB0010383 | 5.716 |
| P16435 | 3FJO | HMDB0034146 | 5.716 |
| Q99497 | 1PDW | HMDB0004610 | 5.714 |
| P16435 | 3FJO | HMDB0010383 | 5.714 |
| P20783 | 1BND | HMDB0010383 | 5.713 |
| P23560 | 1BND | HMDB0010383 | 5.713 |
| P42858 | 3IO4 | HMDB0010383 | 5.712 |
| P16278 | 1BOB | HMDB0010383 | 5.711 |
| P22301 | 2ILK | HMDB0000161 | 5.711 |
| Q9UBK2 | 1XB7 | HMDB0010383 | 5.71  |
| P22301 | 2ILK | HMDB0002329 | 5.707 |
| P01116 | 1N4R | HMDB0000294 | 5.705 |
| Q9Y2R2 | 2P6X | HMDB0010384 | 5.705 |
| P04637 | 1GZH | HMDB0010383 | 5.704 |
| P55072 | 1Y8E | HMDB0010393 | 5.704 |
| P11274 | 1K1F | HMDB0010393 | 5.701 |
| P42858 | 3IO4 | HMDB0010384 | 5.698 |
| P27986 | 1H9O | HMDB0010384 | 5.697 |
| P14416 | 2HLB | HMDB0000161 | 5.697 |
| P01584 | 2NVH | HMDB0010383 | 5.697 |
| P60484 | 1D5R | HMDB0000294 | 5.694 |
| P22301 | 2ILK | HMDB0000190 | 5.694 |
| P16435 | 3FJO | HMDB0000294 | 5.691 |
| P21964 | 3HVH | HMDB0000294 | 5.689 |
| P01127 | 3MJG | HMDB0010393 | 5.689 |
| P21802 | 1DJS | HMDB0000161 | 5.688 |
| P06850 | 1MO1 | HMDB0010396 | 5.686 |
| P01127 | 3MJG | HMDB0010396 | 5.684 |
| P21397 | 2Z5Y | HMDB0000161 | 5.683 |
| P00441 | 1HL5 | HMDB0000294 | 5.679 |
| O15146 | 2IEP | HMDB0010384 | 5.679 |
| P01308 | 1EVR | HMDB0000294 | 5.678 |
| P01584 | 2NVH | HMDB0010396 | 5.678 |

|        |      |             |       |
|--------|------|-------------|-------|
| P49917 | 3II6 | HMDB0010396 | 5.677 |
| Q13936 | 1T0J | HMDB0000161 | 5.676 |
| Q15303 | 2AHX | HMDB0010396 | 5.675 |
| P02768 | 1E7A | HMDB0000294 | 5.672 |
| P21397 | 2Z5Y | HMDB0000159 | 5.672 |
| P51608 | 3C2I | HMDB0010383 | 5.671 |
| P01127 | 3MJG | HMDB0010383 | 5.671 |
| P26358 | 3EPZ | HMDB0010393 | 5.666 |
| Q99700 | 3KTR | HMDB0010393 | 5.666 |
| P01127 | 3MJG | HMDB0000294 | 5.666 |
| P01589 | 3IU3 | HMDB0000161 | 5.664 |
| P01920 | 1UVQ | HMDB0000161 | 5.663 |
| P35637 | 1G5G | HMDB0010384 | 5.661 |
| Q13936 | 1T0J | HMDB0000190 | 5.661 |
| Q9Y617 | 3E77 | HMDB0000294 | 5.66  |
| P08833 | 1ZT3 | HMDB0010396 | 5.658 |
| P78504 | 2VJ2 | HMDB0010393 | 5.658 |
| P55072 | 1Y8E | HMDB0010384 | 5.657 |
| P01589 | 3IU3 | HMDB0000294 | 5.657 |
| Q5S007 | 3D6T | HMDB0000294 | 5.656 |
| P27361 | 3FXW | HMDB0000294 | 5.656 |
| P36551 | 2AEX | HMDB0000123 | 5.654 |
| Q13255 | 1EWT | HMDB0000161 | 5.652 |
| P27487 | 1W1I | HMDB0000161 | 5.652 |
| P42858 | 3IO4 | HMDB0010396 | 5.652 |
| P35520 | 1M54 | HMDB0000161 | 5.651 |
| O43612 | 1UV0 | HMDB0010393 | 5.651 |
| P15289 | 2AIJ | HMDB0000161 | 5.651 |
| P27986 | 1H9O | HMDB0010396 | 5.65  |
| P16278 | 1BOB | HMDB0034146 | 5.645 |
| P42858 | 3IO4 | HMDB0000161 | 5.645 |
| P20783 | 1BND | HMDB0010384 | 5.644 |
| P23560 | 1BND | HMDB0010384 | 5.644 |
| P51608 | 3C2I | HMDB0000161 | 5.643 |
| P03372 | 1HCQ | HMDB0000294 | 5.639 |
| P30793 | 1N3T | HMDB0000161 | 5.637 |
| P26358 | 3EPZ | HMDB0004610 | 5.637 |
| Q15303 | 2AHX | HMDB0010383 | 5.636 |
| P01911 | 2WBJ | HMDB0010383 | 5.635 |
| P11274 | 1K1F | HMDB0010384 | 5.633 |
| P60568 | 1PY2 | HMDB0010384 | 5.631 |
| O15146 | 2IEP | HMDB0010383 | 5.629 |
| P27487 | 1W1I | HMDB0010384 | 5.628 |
| P26358 | 3EPZ | HMDB0010396 | 5.628 |
| P06850 | 1MO1 | HMDB0010384 | 5.627 |
| P55072 | 1Y8E | HMDB0010396 | 5.625 |
| P01584 | 2NVH | HMDB0010393 | 5.623 |
| Q9UBP0 | 3B9P | HMDB0004610 | 5.621 |
| Q9UBK2 | 1XB7 | HMDB0010396 | 5.618 |
| Q99497 | 1PDW | HMDB0010393 | 5.617 |
| O43612 | 1UV0 | HMDB0010384 | 5.617 |
| P49917 | 3II6 | HMDB0000294 | 5.617 |
| P05067 | 2FK3 | HMDB0010383 | 5.616 |
| P60484 | 1D5R | HMDB0034146 | 5.613 |
| Q7LG56 | 3HF1 | HMDB0010383 | 5.612 |
| Q99259 | 2OKJ | HMDB0000123 | 5.608 |
| Q99700 | 3KTR | HMDB0000294 | 5.608 |
| P01127 | 3MJG | HMDB0010384 | 5.608 |
| Q9Y617 | 3E77 | HMDB0000123 | 5.606 |
| Q06787 | 2QND | HMDB0010383 | 5.606 |
| Q16620 | 1HCF | HMDB0010393 | 5.605 |
| P04150 | 1P93 | HMDB0000294 | 5.603 |
| P26358 | 3EPZ | HMDB0010384 | 5.602 |
| Q7LG56 | 3HF1 | HMDB0010384 | 5.602 |
| P04062 | 2NT0 | HMDB0010393 | 5.601 |
| P08397 | 3ECR | HMDB0000099 | 5.6   |
| P04062 | 2NT0 | HMDB0010383 | 5.599 |
| Q06787 | 2QND | HMDB0010384 | 5.599 |
| O43612 | 1UV0 | HMDB0010383 | 5.597 |



|        |      |              |       |
|--------|------|--------------|-------|
| Q99700 | 3KTR | HMDB0010383  | 5.597 |
| P60568 | 1PY2 | HMDB0010383  | 5.595 |
| P08397 | 3ECR | HMDB0000161  | 5.595 |
| P49917 | 3II6 | HMDB0010384  | 5.595 |
| P51659 | 1IKT | HMDB0000099  | 5.593 |
| O15146 | 2IEP | HMDB0000294  | 5.593 |
| P00450 | 2J5W | HMDB0010384  | 5.591 |
| P39905 | 2V5E | HMDB0010384  | 5.59  |
| Q99497 | 1PDW | HMDB0034146  | 5.588 |
| Q02750 | 3EQC | HMDB0000294  | 5.588 |
| Q16620 | 1HCF | HMDB0010384  | 5.587 |
| Q15465 | 3M1N | HMDB0010383  | 5.586 |
| P27338 | 1OJA | HMDB0000123  | 5.585 |
| P00450 | 2J5W | HMDB0010393  | 5.585 |
| P04278 | 1LHV | HMDB0000161  | 5.582 |
| Q13936 | 1T0J | HMDB0001494  | 5.581 |
| P49917 | 3II6 | HMDB0010383  | 5.579 |
| P08069 | 3F5P | HMDB0000294  | 5.577 |
| P04637 | 1GZH | HMDB00004610 | 5.576 |
| P78509 | 2DDU | HMDB00004610 | 5.576 |
| P28329 | 2FY3 | HMDB0000294  | 5.575 |
| P78504 | 2VJ2 | HMDB0010384  | 5.574 |
| Q30201 | 1DEA | HMDB0000161  | 5.573 |
| P02741 | 1CGP | HMDB0000123  | 5.572 |
| P09619 | 1GQ5 | HMDB0010396  | 5.572 |
| P20783 | 1BND | HMDB0000294  | 5.571 |
| P23560 | 1BND | HMDB0000294  | 5.571 |
| P27986 | 1H9O | HMDB0010393  | 5.571 |
| P16220 | 1DH3 | HMDB0000294  | 5.57  |
| P17612 | 3MVJ | HMDB0000123  | 5.568 |
| P78509 | 2DDU | HMDB0000294  | 5.566 |
| P49917 | 3II6 | HMDB0010393  | 5.565 |
| P02787 | 1DAN | HMDB0000294  | 5.562 |
| P20783 | 1BND | HMDB0010396  | 5.56  |
| P23560 | 1BND | HMDB0010396  | 5.56  |
| P01911 | 2WBJ | HMDB0010384  | 5.558 |
| P01241 | 1AXI | HMDB0010383  | 5.557 |
| P10912 | 1AXI | HMDB0010383  | 5.557 |
| P07949 | 2IVS | HMDB0000161  | 5.557 |
| Q06124 | 2SHP | HMDB0000123  | 5.557 |
| Q9UBP0 | 3B9P | HMDB0010384  | 5.557 |
| Q8NER1 | 2NYJ | HMDB0010383  | 5.556 |
| P12821 | 1UZE | HMDB0000161  | 5.555 |
| Q15303 | 2AHX | HMDB0000294  | 5.552 |
| Q7LG56 | 3HF1 | HMDB0010393  | 5.552 |
| P27487 | 1W1I | HMDB0010383  | 5.55  |
| P02787 | 1DAN | HMDB0010384  | 5.548 |
| Q15067 | 1W07 | HMDB0000123  | 5.541 |
| Q5S007 | 3D6T | HMDB0000190  | 5.537 |
| P05019 | 1H02 | HMDB0000294  | 5.534 |
| P14902 | 2D0T | HMDB0000161  | 5.534 |
| Q9UBK2 | 1XB7 | HMDB0000161  | 5.533 |
| Q7LG56 | 3HF1 | HMDB0010396  | 5.533 |
| P05067 | 2FK3 | HMDB0000294  | 5.531 |
| Q9UBK2 | 1XB7 | HMDB0010384  | 5.53  |
| Q99497 | 1PDW | HMDB0010383  | 5.527 |
| Q9UBP0 | 3B9P | HMDB0010383  | 5.523 |
| P51608 | 3C2I | HMDB0000294  | 5.523 |
| Q8NFD5 | 2EH9 | HMDB0034146  | 5.521 |
| Q08499 | 1MKD | HMDB0000925  | 5.52  |
| Q14203 | 2HL5 | HMDB0010393  | 5.517 |
| Q30201 | 1DEA | HMDB0000123  | 5.516 |
| Q08499 | 1MKD | HMDB0000123  | 5.513 |
| Q8NER1 | 2NYJ | HMDB0010396  | 5.513 |
| Q5S007 | 3D6T | HMDB0010396  | 5.511 |
| P01579 | 1EKU | HMDB0010384  | 5.507 |
| Q9UBK2 | 1XB7 | HMDB0010393  | 5.503 |
| Q99700 | 3KTR | HMDB0000161  | 5.503 |
| Q99497 | 1PDW | HMDB0010396  | 5.5   |

|        |      |             |       |
|--------|------|-------------|-------|
| P27986 | 1H9O | HMDB0004610 | 5.496 |
| P12821 | 1UZE | HMDB0000123 | 5.496 |
| Q5S007 | 3D6T | HMDB0010383 | 5.495 |
| P04062 | 2NT0 | HMDB0010384 | 5.494 |
| Q16620 | 1HCF | HMDB0010383 | 5.493 |
| O43612 | 1UV0 | HMDB0010396 | 5.493 |
| P78509 | 2DDU | HMDB0010383 | 5.493 |
| P21333 | 2WFN | HMDB0010393 | 5.493 |
| P11362 | 1CVS | HMDB0010383 | 5.492 |
| P23771 | 3DFV | HMDB0000294 | 5.49  |
| P20783 | 1BND | HMDB0010393 | 5.489 |
| P23560 | 1BND | HMDB0010393 | 5.489 |
| Q9NQC3 | 1OZN | HMDB0010383 | 5.488 |
| Q9Y617 | 3E77 | HMDB0000161 | 5.487 |
| P08833 | 1ZT3 | HMDB0010384 | 5.487 |
| Q8NER1 | 2NYJ | HMDB0010393 | 5.487 |
| Q03431 | 3L2J | HMDB0000161 | 5.487 |
| P08397 | 3ECR | HMDB0000123 | 5.486 |
| P21802 | 1DJS | HMDB0000123 | 5.483 |
| P31749 | 2UZS | HMDB0010393 | 5.48  |
| Q9NQC3 | 1OZN | HMDB0010384 | 5.477 |
| P30793 | 1N3T | HMDB0000925 | 5.475 |
| Q16620 | 1HCF | HMDB0010396 | 5.474 |
| Q9NQC3 | 1OZN | HMDB0010396 | 5.473 |
| P03372 | 1HCQ | HMDB0000099 | 5.471 |
| P08833 | 1ZT3 | HMDB0010393 | 5.471 |
| Q5S007 | 3D6T | HMDB0010393 | 5.47  |
| P68871 | 1BAB | HMDB0000122 | 5.469 |
| P27338 | 1OJA | HMDB0000925 | 5.467 |
| P01138 | 1SG1 | HMDB0000122 | 5.467 |
| O15146 | 2IEP | HMDB0004610 | 5.467 |
| P01270 | 3C4M | HMDB0000122 | 5.466 |
| Q16620 | 1HCF | HMDB0004610 | 5.465 |
| P14902 | 2D0T | HMDB0000122 | 5.465 |
| P78509 | 2DDU | HMDB0034146 | 5.465 |
| P01270 | 3C4M | HMDB0000161 | 5.465 |
| P51659 | 1IKT | HMDB0000122 | 5.464 |
| P10145 | 1QE6 | HMDB0004610 | 5.462 |
| Q03431 | 3L2J | HMDB0000123 | 5.461 |
| P14416 | 2HLB | HMDB0000123 | 5.46  |
| Q99700 | 3KTR | HMDB0000925 | 5.458 |
| O15146 | 2IEP | HMDB0010396 | 5.457 |
| Q5S007 | 3D6T | HMDB0010384 | 5.457 |
| P01241 | 1AXI | HMDB0000294 | 5.456 |
| P10912 | 1AXI | HMDB0000294 | 5.456 |
| P21964 | 3HVH | HMDB0000122 | 5.453 |
| P15056 | 3II5 | HMDB0000122 | 5.453 |
| P22301 | 2ILK | HMDB0000123 | 5.452 |
| P04278 | 1LHV | HMDB0000123 | 5.451 |
| Q8NER1 | 2NYJ | HMDB0010384 | 5.451 |
| Q03431 | 3L2J | HMDB0000122 | 5.45  |
| P09619 | 1GQ5 | HMDB0010393 | 5.449 |
| P01375 | 2AZ5 | HMDB0010383 | 5.447 |
| O15146 | 2IEP | HMDB0010393 | 5.447 |
| P01127 | 3MJG | HMDB0000925 | 5.447 |
| P36551 | 2AEX | HMDB0000122 | 5.446 |
| P14416 | 2HLB | HMDB0000925 | 5.445 |
| P04278 | 1LHV | HMDB0000122 | 5.444 |
| P17612 | 3MVJ | HMDB0000122 | 5.443 |
| Q16620 | 1HCF | HMDB0034146 | 5.442 |
| P05231 | 1ALU | HMDB0010384 | 5.441 |
| P11362 | 1CVS | HMDB0010384 | 5.439 |
| P31749 | 2UZS | HMDB0010384 | 5.439 |
| Q15067 | 1W07 | HMDB0000122 | 5.438 |
| P04062 | 2NT0 | HMDB0004610 | 5.438 |
| Q30201 | 1DEA | HMDB0000122 | 5.436 |
| P27361 | 3FXW | HMDB0000122 | 5.436 |
| P42336 | 3HHM | HMDB0000099 | 5.435 |
| P41159 | 3IIQ | HMDB0010393 | 5.435 |

|        |      |             |       |
|--------|------|-------------|-------|
| P05019 | 1H02 | HMDB0000925 | 5.434 |
| O00555 | 3BXK | HMDB0010393 | 5.434 |
| P15056 | 3II5 | HMDB0000099 | 5.434 |
| P28482 | 1PME | HMDB0000122 | 5.432 |
| P21802 | 1DJS | HMDB0000122 | 5.431 |
| Q99259 | 2OKJ | HMDB0000122 | 5.43  |
| P39905 | 2V5E | HMDB0010383 | 5.43  |
| P30793 | 1N3T | HMDB0000122 | 5.428 |
| P08833 | 1ZT3 | HMDB0010383 | 5.428 |
| P30793 | 1N3T | HMDB0000123 | 5.427 |
| P09619 | 1GQ5 | HMDB0004610 | 5.426 |
| P05231 | 1ALU | HMDB0010383 | 5.425 |
| P55072 | 1Y8E | HMDB0000161 | 5.425 |
| P14416 | 2HLB | HMDB0000122 | 5.425 |
| Q14203 | 2HL5 | HMDB0010384 | 5.424 |
| P04150 | 1P93 | HMDB0000122 | 5.423 |
| P01303 | 1R9N | HMDB0010384 | 5.423 |
| P39905 | 2V5E | HMDB0010393 | 5.423 |
| P41159 | 3IIQ | HMDB0010396 | 5.422 |
| P02787 | 1DAN | HMDB0010383 | 5.421 |
| P22301 | 2ILK | HMDB0000925 | 5.421 |
| Q9Y2R2 | 2P6X | HMDB0034146 | 5.421 |
| O00555 | 3BXK | HMDB0010396 | 5.421 |
| P01116 | 1N4R | HMDB0000122 | 5.42  |
| P21333 | 2WFN | HMDB0010383 | 5.419 |
| Q9BYW2 | 3H6L | HMDB0000122 | 5.419 |
| Q99497 | 1PDW | HMDB0010384 | 5.418 |
| P39905 | 2V5E | HMDB0001494 | 5.416 |
| P21333 | 2WFN | HMDB0034146 | 5.416 |
| Q06787 | 2QND | HMDB0004610 | 5.414 |
| P60568 | 1PY2 | HMDB0000925 | 5.414 |
| P51608 | 3C2I | HMDB0000925 | 5.413 |
| P26358 | 3EPZ | HMDB0001494 | 5.413 |
| P22301 | 2ILK | HMDB0001494 | 5.411 |
| P20783 | 1BND | HMDB0000925 | 5.41  |
| P23560 | 1BND | HMDB0000925 | 5.41  |
| P01584 | 2NVH | HMDB0000925 | 5.41  |
| P78504 | 2VJ2 | HMDB0010383 | 5.41  |
| P21333 | 2WFN | HMDB0004610 | 5.408 |
| Q13255 | 1EWT | HMDB0000294 | 5.407 |
| P04271 | 2H61 | HMDB0000122 | 5.407 |
| P01241 | 1AXI | HMDB0000925 | 5.406 |
| P10912 | 1AXI | HMDB0000925 | 5.406 |
| P02768 | 1E7A | HMDB0000122 | 5.405 |
| O00555 | 3BXK | HMDB0000925 | 5.405 |
| Q13936 | 1T0J | HMDB0000123 | 5.401 |
| Q9UBK2 | 1XB7 | HMDB0004610 | 5.4   |
| P00450 | 2J5W | HMDB0010383 | 5.4   |
| P00450 | 2J5W | HMDB0010396 | 5.4   |
| O00555 | 3BXK | HMDB0010384 | 5.4   |
| P01303 | 1R9N | HMDB0010393 | 5.399 |
| P39905 | 2V5E | HMDB0010396 | 5.399 |
| Q06124 | 2SHP | HMDB0000122 | 5.398 |
| P16278 | 1BOB | HMDB0001494 | 5.397 |
| Q06787 | 2QND | HMDB0001494 | 5.397 |
| P35520 | 1M54 | HMDB0000925 | 5.394 |
| P11362 | 1CVS | HMDB0001494 | 5.393 |
| Q5S007 | 3D6T | HMDB0000925 | 5.393 |
| P01920 | 1UVQ | HMDB0000123 | 5.392 |
| P01270 | 3C4M | HMDB0000123 | 5.392 |
| P06850 | 1MO1 | HMDB0000925 | 5.391 |
| P04062 | 2NT0 | HMDB0000925 | 5.391 |
| P08397 | 3ECR | HMDB0000122 | 5.391 |
| P05231 | 1ALU | HMDB0000925 | 5.389 |
| P09619 | 1GQ5 | HMDB0010383 | 5.389 |
| P01589 | 3IU3 | HMDB0000123 | 5.389 |
| P35637 | 1G5G | HMDB0000925 | 5.388 |
| P43354 | 1OVL | HMDB0001494 | 5.388 |
| O43612 | 1UV0 | HMDB0000925 | 5.388 |

|        |       |              |       |
|--------|-------|--------------|-------|
| Q9UBK2 | 1XB7  | HMDB0000925  | 5.388 |
| P27338 | 1OJA  | HMDB0000122  | 5.387 |
| P01911 | 2WBJ  | HMDB0000925  | 5.387 |
| P27986 | 1H9O  | HMDB0000122  | 5.386 |
| P42858 | 3IO4  | HMDB0000925  | 5.385 |
| P05231 | 1ALU  | HMDB0034146  | 5.384 |
| P08397 | 3ECR  | HMDB0000925  | 5.384 |
| P02741 | 1CGP  | HMDB0000122  | 5.383 |
| Q9NQC3 | 1OZN  | HMDB0000925  | 5.383 |
| Q9Y617 | 3E77  | HMDB0000122  | 5.382 |
| Q15303 | 2AHX  | HMDB0000123  | 5.382 |
| P15289 | 2AIJ  | HMDB0000123  | 5.382 |
| P35520 | 1M54  | HMDB0000123  | 5.381 |
| Q08499 | 1MKD  | HMDB0000122  | 5.38  |
| P14902 | 2D0T  | HMDB0000123  | 5.38  |
| P11362 | 1CVS  | HMDB0010393  | 5.379 |
| P21359 | 2D4Q  | HMDB0000641  | 5.379 |
| P05067 | 2FK3  | HMDB0000122  | 5.379 |
| P16435 | 3FJO  | HMDB0000122  | 5.379 |
| Q02750 | 3EQC  | HMDB0000122  | 5.378 |
| P22301 | 2ILK  | HMDB0000294  | 5.377 |
| P60484 | 1D5R  | HMDB0000122  | 5.375 |
| P29475 | 1F20  | HMDB0000122  | 5.375 |
| P60484 | 1D5R  | HMDB0010383  | 5.374 |
| P11274 | 1K1F  | HMDB0000925  | 5.374 |
| Q06124 | 2SHP  | HMDB0010383  | 5.374 |
| P31749 | 2UZS  | HMDB0010383  | 5.374 |
| P21397 | 2Z5Y  | HMDB0000122  | 5.374 |
| P42336 | 3HHM  | HMDB0000122  | 5.374 |
| P00450 | 2J5W  | HMDB0000925  | 5.373 |
| P11362 | 1CVS  | HMDB0034146  | 5.372 |
| P10145 | 1QE6  | HMDB0000122  | 5.372 |
| P11274 | 1K1F  | HMDB0034146  | 5.371 |
| P27487 | 1W1I  | HMDB0000123  | 5.371 |
| Q9Y2R2 | 2P6X  | HMDB0000925  | 5.371 |
| P11362 | 1CVS  | HMDB0000925  | 5.37  |
| P05019 | 1H02  | HMDB0000161  | 5.37  |
| P08833 | 1ZT3  | HMDB00004610 | 5.369 |
| P15289 | 2AIJ  | HMDB0000294  | 5.369 |
| Q16620 | 1HCF  | HMDB0001494  | 5.368 |
| Q15303 | 2AHX  | HMDB00004610 | 5.368 |
| P54098 | 1A1V  | HMDB0000099  | 5.367 |
| P05019 | 1H02  | HMDB00004610 | 5.366 |
| P01911 | 2WBJ  | HMDB0001494  | 5.366 |
| P08069 | 3F5P  | HMDB0000122  | 5.365 |
| P02787 | 1DAN  | HMDB0000122  | 5.364 |
| P01920 | 1UVQ  | HMDB0000294  | 5.363 |
| P35520 | 1M54  | HMDB0000122  | 5.362 |
| Q06787 | 2QND  | HMDB0000925  | 5.362 |
| Q9Y243 | 2X18  | HMDB0000122  | 5.362 |
| P06850 | 1MO1  | HMDB0000294  | 5.361 |
| P78509 | 2DDU  | HMDB0000925  | 5.361 |
| P00450 | 2J5W  | HMDB00004610 | 5.361 |
| Q14203 | 2HL5  | HMDB0000294  | 5.36  |
| Q43612 | 1UV0  | HMDB00004610 | 5.359 |
| Q9UBK2 | 1XB7  | HMDB0000123  | 5.359 |
| P05231 | 1ALU  | HMDB0001494  | 5.358 |
| P01579 | 1EKU  | HMDB00004610 | 5.357 |
| Q16620 | 1HCF  | HMDB0000925  | 5.357 |
| P10082 | 2ZA5  | HMDB0000122  | 5.357 |
| P26358 | 3EPZ  | HMDB0034146  | 5.357 |
| P04637 | 1GZH  | HMDB0000122  | 5.356 |
| P42345 | 4FAP  | HMDB0001494  | 5.354 |
| P01911 | 2WBJ  | HMDB0010393  | 5.352 |
| P06280 | 3HG3  | HMDB0034146  | 5.352 |
| O00555 | 3B XK | HMDB0010383  | 5.351 |
| P11362 | 1CVS  | HMDB0010396  | 5.35  |
| P09619 | 1GQ5  | HMDB0010384  | 5.35  |
| O15146 | 2IEP  | HMDB0000122  | 5.35  |

|        |      |             |       |
|--------|------|-------------|-------|
| P04062 | 2NT0 | HMDB0000122 | 5.35  |
| P11362 | 1CVS | HMDB0004610 | 5.349 |
| P01138 | 1SG1 | HMDB0000294 | 5.347 |
| P21964 | 3HVH | HMDB0010383 | 5.347 |
| P01579 | 1EKU | HMDB0001494 | 5.346 |
| P21333 | 2WFN | HMDB0010396 | 5.346 |
| Q06124 | 2SHP | HMDB0000641 | 5.344 |
| P05231 | 1ALU | HMDB0010396 | 5.342 |
| P54098 | 1A1V | HMDB0000122 | 5.341 |
| Q8NER1 | 2NYJ | HMDB0034146 | 5.341 |
| P08833 | 1ZT3 | HMDB0034146 | 5.339 |
| P21964 | 3HVH | HMDB0001494 | 5.339 |
| P02741 | 1CGP | HMDB0001494 | 5.338 |
| P02768 | 1E7A | HMDB0000123 | 5.338 |
| P01308 | 1EVR | HMDB0000122 | 5.338 |
| P01303 | 1R9N | HMDB0004610 | 5.337 |
| P31749 | 2UZS | HMDB0010396 | 5.336 |
| P16220 | 1DH3 | HMDB0010384 | 5.335 |
| P41159 | 3IIQ | HMDB0010383 | 5.334 |
| P41159 | 3IIQ | HMDB0000925 | 5.333 |
| P41159 | 3IIQ | HMDB0010384 | 5.332 |
| P05231 | 1ALU | HMDB0010393 | 5.33  |
| P68871 | 1BAB | HMDB0000161 | 5.328 |
| Q13255 | 1EWT | HMDB0000123 | 5.328 |
| P28329 | 2FY3 | HMDB0000122 | 5.328 |
| P16220 | 1DH3 | HMDB0010383 | 5.327 |
| P03372 | 1HCQ | HMDB0000122 | 5.327 |
| P12821 | 1UZE | HMDB0000122 | 5.326 |
| P01584 | 2NVH | HMDB0004610 | 5.326 |
| Q9Y243 | 2X18 | HMDB0001494 | 5.326 |
| P08397 | 3ECR | HMDB0001494 | 5.326 |
| P21359 | 2D4Q | HMDB0000161 | 5.324 |
| Q06124 | 2SHP | HMDB0001494 | 5.323 |
| P42345 | 4FAP | HMDB0000122 | 5.322 |
| P01911 | 2WBJ | HMDB0010396 | 5.32  |
| P60568 | 1PY2 | HMDB0000161 | 5.32  |
| P01270 | 3C4M | HMDB0000925 | 5.316 |
| P27986 | 1H9O | HMDB0001494 | 5.315 |
| P27986 | 1H9O | HMDB0034146 | 5.315 |
| P23771 | 3DFV | HMDB0000122 | 5.314 |
| P05019 | 1H02 | HMDB0000122 | 5.313 |
| P21333 | 2WFN | HMDB0010384 | 5.313 |
| P41159 | 3IIQ | HMDB0034146 | 5.313 |
| P42858 | 3IO4 | HMDB0000123 | 5.313 |
| P43354 | 1OVL | HMDB0000099 | 5.311 |
| Q13936 | 1T0J | HMDB0000294 | 5.311 |
| P31749 | 2UZS | HMDB0004610 | 5.309 |
| P49917 | 3II6 | HMDB0000122 | 5.309 |
| P21359 | 2D4Q | HMDB0000122 | 5.308 |
| Q7LG56 | 3HF1 | HMDB0004610 | 5.307 |
| P01911 | 2WBJ | HMDB0000122 | 5.306 |
| P14416 | 2HLB | HMDB0000641 | 5.305 |
| P06280 | 3HG3 | HMDB0001494 | 5.305 |
| P30793 | 1N3T | HMDB0001494 | 5.303 |
| P62834 | 3KUC | HMDB0001494 | 5.303 |
| Q7LG56 | 3HF1 | HMDB0001494 | 5.302 |
| P04049 | 3CU8 | HMDB0000099 | 5.301 |
| P01303 | 1R9N | HMDB0010383 | 5.298 |
| Q08499 | 1MKD | HMDB0000161 | 5.297 |
| Q15067 | 1W07 | HMDB0001494 | 5.297 |
| P01375 | 2AZ5 | HMDB0010384 | 5.297 |
| P39905 | 2V5E | HMDB0000122 | 5.297 |
| Q99497 | 1PDW | HMDB0000161 | 5.296 |
| Q15303 | 2AHX | HMDB0000122 | 5.292 |
| Q06787 | 2QND | HMDB0034146 | 5.292 |
| P04278 | 1LHV | HMDB0000641 | 5.291 |
| P35520 | 1M54 | HMDB0001494 | 5.29  |
| P07949 | 2IVS | HMDB0000123 | 5.29  |
| P36551 | 2AEX | HMDB0000641 | 5.289 |

|        |      |              |       |
|--------|------|--------------|-------|
| Q9Y617 | 3E77 | HMDB0000925  | 5.288 |
| P01584 | 2NVH | HMDB0001494  | 5.288 |
| P15056 | 3II5 | HMDB0001494  | 5.288 |
| P01303 | 1R9N | HMDB0010396  | 5.287 |
| P49917 | 3II6 | HMDB0034146  | 5.286 |
| P16220 | 1DH3 | HMDB0010393  | 5.285 |
| P16220 | 1DH3 | HMDB0010396  | 5.285 |
| P51659 | 1IKT | HMDB0000161  | 5.283 |
| P00450 | 2J5W | HMDB0001494  | 5.283 |
| P41159 | 3IIQ | HMDB00004610 | 5.282 |
| O43612 | 1UV0 | HMDB0000122  | 5.28  |
| P14902 | 2D0T | HMDB0000641  | 5.279 |
| Q30201 | 1DEA | HMDB0001494  | 5.278 |
| P02768 | 1E7A | HMDB0000161  | 5.275 |
| P27338 | 1OJA | HMDB0000294  | 5.275 |
| P01911 | 2WBJ | HMDB00004610 | 5.275 |
| P36551 | 2AEX | HMDB0001494  | 5.272 |
| Q9UBK2 | 1XB7 | HMDB0000122  | 5.271 |
| P21359 | 2D4Q | HMDB0001494  | 5.271 |
| P20783 | 1BND | HMDB00004610 | 5.27  |
| P23560 | 1BND | HMDB00004610 | 5.27  |
| P09619 | 1GQ5 | HMDB0000122  | 5.269 |
| P78504 | 2VJ2 | HMDB0000122  | 5.269 |
| P02741 | 1CGP | HMDB0000641  | 5.268 |
| P35520 | 1M54 | HMDB0000641  | 5.268 |
| P14902 | 2D0T | HMDB0001494  | 5.268 |
| P04049 | 3CU8 | HMDB0001494  | 5.266 |
| P60568 | 1PY2 | HMDB0001494  | 5.266 |
| P04278 | 1LHV | HMDB0001494  | 5.265 |
| P04049 | 3CU8 | HMDB0000122  | 5.265 |
| P51659 | 1IKT | HMDB0001494  | 5.264 |
| P43354 | 1OVL | HMDB0000122  | 5.263 |
| Q16620 | 1HCF | HMDB0000122  | 5.262 |
| P78509 | 2DDU | HMDB0010393  | 5.258 |
| Q7LG56 | 3HF1 | HMDB0000123  | 5.258 |
| Q03431 | 3L2J | HMDB0000641  | 5.258 |
| P55072 | 1Y8E | HMDB0000294  | 5.257 |
| P12821 | 1UZE | HMDB0001494  | 5.255 |
| P20783 | 1BND | HMDB0001494  | 5.254 |
| P23560 | 1BND | HMDB0001494  | 5.254 |
| O00555 | 3BXK | HMDB0034146  | 5.254 |
| P54098 | 1A1V | HMDB0001494  | 5.253 |
| P78504 | 2VJ2 | HMDB0000294  | 5.253 |
| P14416 | 2HLB | HMDB0001494  | 5.251 |
| P07949 | 2IVS | HMDB0000122  | 5.251 |
| Q8NER1 | 2NYJ | HMDB0001494  | 5.251 |
| P60568 | 1PY2 | HMDB00004610 | 5.251 |
| P01127 | 3MJG | HMDB0001494  | 5.251 |
| Q15465 | 3M1N | HMDB00004610 | 5.25  |
| P55072 | 1Y8E | HMDB0000925  | 5.249 |
| P27487 | 1W1I | HMDB00004610 | 5.248 |
| P01127 | 3MJG | HMDB0000122  | 5.248 |
| P05231 | 1ALU | HMDB00004610 | 5.247 |
| P04637 | 1GZH | HMDB0034146  | 5.246 |
| P04278 | 1LHV | HMDB0003681  | 5.246 |
| P41159 | 3IIQ | HMDB0001494  | 5.246 |
| P62834 | 3KUC | HMDB0000925  | 5.246 |
| P35637 | 1G5G | HMDB00004610 | 5.245 |
| P01270 | 3C4M | HMDB0000641  | 5.24  |
| P31749 | 2UZS | HMDB0034146  | 5.235 |
| Q9BYW2 | 3H6L | HMDB0001494  | 5.234 |
| P01579 | 1EKU | HMDB0034146  | 5.233 |
| P02768 | 1E7A | HMDB0000925  | 5.231 |
| P09619 | 1GQ5 | HMDB0001494  | 5.231 |
| P54098 | 1A1V | HMDB0000641  | 5.23  |
| P39905 | 2V5E | HMDB0034146  | 5.23  |
| P55072 | 1Y8E | HMDB0000122  | 5.228 |
| P28482 | 1PME | HMDB0001494  | 5.227 |
| P11274 | 1K1F | HMDB0001494  | 5.226 |

|        |      |              |       |
|--------|------|--------------|-------|
| P16220 | 1DH3 | HMDB0000161  | 5.225 |
| P01303 | 1R9N | HMDB0034146  | 5.225 |
| Q15465 | 3M1N | HMDB0001494  | 5.223 |
| Q5S007 | 3D6T | HMDB00004610 | 5.221 |
| O43612 | 1UV0 | HMDB0001494  | 5.219 |
| Q99497 | 1PDW | HMDB0001494  | 5.218 |
| P04049 | 3CU8 | HMDB0000161  | 5.217 |
| Q9UBP0 | 3B9P | HMDB0001494  | 5.216 |
| P16278 | 1BOB | HMDB0000122  | 5.215 |
| P09619 | 1GQ5 | HMDB0034146  | 5.213 |
| P10145 | 1QE6 | HMDB0034146  | 5.213 |
| P01241 | 1AXI | HMDB0001494  | 5.209 |
| P10912 | 1AXI | HMDB0001494  | 5.209 |
| P68871 | 1BAB | HMDB0000123  | 5.209 |
| P21802 | 1DJS | HMDB0000925  | 5.209 |
| P01112 | 1NVU | HMDB0001494  | 5.209 |
| P01241 | 1AXI | HMDB0004610  | 5.207 |
| P10912 | 1AXI | HMDB0004610  | 5.207 |
| Q8NFD5 | 2EH9 | HMDB0000122  | 5.206 |
| Q9BYW2 | 3H6L | HMDB0000161  | 5.204 |
| P01116 | 1N4R | HMDB0003681  | 5.203 |
| P01911 | 2WBJ | HMDB0034146  | 5.203 |
| Q9Y617 | 3E77 | HMDB0001494  | 5.201 |
| P28482 | 1PME | HMDB0000161  | 5.199 |
| P01375 | 2AZ5 | HMDB0001494  | 5.199 |
| Q9NQC3 | 1OZN | HMDB0004610  | 5.198 |
| P78509 | 2DDU | HMDB0001494  | 5.198 |
| P01375 | 2AZ5 | HMDB0000122  | 5.196 |
| Q99259 | 2OKJ | HMDB0001494  | 5.195 |
| P01116 | 1N4R | HMDB0000641  | 5.194 |
| P78509 | 2DDU | HMDB0000161  | 5.194 |
| P04637 | 1GZH | HMDB0000925  | 5.193 |
| P06850 | 1MO1 | HMDB0004610  | 5.192 |
| P10145 | 1QE6 | HMDB0000161  | 5.192 |
| Q15303 | 2AHX | HMDB0001494  | 5.192 |
| P17612 | 3MVJ | HMDB0001494  | 5.192 |
| P51608 | 3C2I | HMDB0004610  | 5.188 |
| P03372 | 1HCQ | HMDB0000925  | 5.187 |
| P05231 | 1ALU | HMDB0000122  | 5.186 |
| P78504 | 2VJ2 | HMDB0001494  | 5.186 |
| P04049 | 3CU8 | HMDB0000123  | 5.18  |
| P20783 | 1BND | HMDB0000122  | 5.179 |
| P23560 | 1BND | HMDB0000122  | 5.179 |
| P04271 | 2H61 | HMDB0001494  | 5.179 |
| P06280 | 3HG3 | HMDB0000925  | 5.177 |
| P27487 | 1W1I | HMDB0001494  | 5.176 |
| P04062 | 2NT0 | HMDB0001494  | 5.176 |
| P35637 | 1G5G | HMDB0001494  | 5.173 |
| Q99700 | 3KTR | HMDB0000123  | 5.173 |
| P10145 | 1QE6 | HMDB0000123  | 5.169 |
| P10082 | 2ZA5 | HMDB0000641  | 5.169 |
| P68871 | 1BAB | HMDB0000925  | 5.168 |
| Q9Y243 | 2X18 | HMDB0000925  | 5.168 |
| P42345 | 4FAP | HMDB0000641  | 5.168 |
| P01589 | 3IU3 | HMDB0004610  | 5.167 |
| Q08499 | 1MKD | HMDB0000641  | 5.166 |
| P55072 | 1Y8E | HMDB0001494  | 5.165 |
| P42858 | 3IO4 | HMDB0004610  | 5.165 |
| P35637 | 1G5G | HMDB0000161  | 5.164 |
| P28329 | 2FY3 | HMDB0000161  | 5.164 |
| P11362 | 1CVS | HMDB0000122  | 5.163 |
| P55072 | 1Y8E | HMDB0004610  | 5.162 |
| P12821 | 1UZE | HMDB0000641  | 5.161 |
| P05067 | 2FK3 | HMDB0000925  | 5.16  |
| P28329 | 2FY3 | HMDB0000641  | 5.16  |
| P00441 | 1HL5 | HMDB0001494  | 5.159 |
| P20783 | 1BND | HMDB0000161  | 5.157 |
| P23560 | 1BND | HMDB0000161  | 5.157 |
| P27361 | 3FXW | HMDB0000925  | 5.157 |

|        |      |             |       |
|--------|------|-------------|-------|
| P62834 | 3KUC | HMDB0000122 | 5.157 |
| Q7LG56 | 3HF1 | HMDB0000122 | 5.156 |
| Q9NQC3 | 1OZN | HMDB0001494 | 5.155 |
| P15289 | 2AIJ | HMDB0001494 | 5.155 |
| P54098 | 1A1V | HMDB0000161 | 5.154 |
| P60484 | 1D5R | HMDB0010384 | 5.154 |
| P78504 | 2VJ2 | HMDB0004610 | 5.152 |
| Q02750 | 3EQC | HMDB0000641 | 5.151 |
| P01138 | 1SG1 | HMDB0000641 | 5.15  |
| P60568 | 1PY2 | HMDB0000122 | 5.149 |
| P01579 | 1EKU | HMDB0000122 | 5.148 |
| Q14203 | 2HL5 | HMDB0000161 | 5.147 |
| Q06787 | 2QND | HMDB0000122 | 5.147 |
| P04637 | 1GZH | HMDB0001494 | 5.146 |
| P21964 | 3HVH | HMDB0000123 | 5.146 |
| Q15067 | 1W07 | HMDB0000641 | 5.144 |
| P01584 | 2NVH | HMDB0000122 | 5.144 |
| P10082 | 2ZA5 | HMDB0000099 | 5.144 |
| P08069 | 3F5P | HMDB0001494 | 5.144 |
| P00450 | 2J5W | HMDB0000161 | 5.142 |
| Q99497 | 1PDW | HMDB0000123 | 5.14  |
| P15289 | 2AIJ | HMDB0004610 | 5.139 |
| Q9BYW2 | 3H6L | HMDB0000641 | 5.139 |
| P35637 | 1G5G | HMDB0034146 | 5.138 |
| P04062 | 2NT0 | HMDB0034146 | 5.138 |
| P68871 | 1BAB | HMDB0000641 | 5.134 |
| P11274 | 1K1F | HMDB0000122 | 5.132 |
| P43354 | 1OVL | HMDB0000641 | 5.131 |
| Q5S007 | 3D6T | HMDB0001494 | 5.131 |
| P21964 | 3HVH | HMDB0000641 | 5.131 |
| P26358 | 3EPZ | HMDB0000122 | 5.129 |
| Q14203 | 2HL5 | HMDB0004610 | 5.127 |
| Q99700 | 3KTR | HMDB0000122 | 5.124 |
| Q30201 | 1DEA | HMDB0000641 | 5.123 |
| Q9NQC3 | 1OZN | HMDB0000161 | 5.123 |
| P04150 | 1P93 | HMDB0000641 | 5.122 |
| P02768 | 1E7A | HMDB0000641 | 5.12  |
| Q13255 | 1EWT | HMDB0004610 | 5.119 |
| P05067 | 2FK3 | HMDB0000099 | 5.117 |
| P08833 | 1ZT3 | HMDB0000122 | 5.116 |
| P27361 | 3FXW | HMDB0000123 | 5.116 |
| Q99497 | 1PDW | HMDB0000122 | 5.114 |
| P01584 | 2NVH | HMDB0034146 | 5.114 |
| Q00555 | 3BXK | HMDB0000122 | 5.114 |
| Q7LG56 | 3HF1 | HMDB0000161 | 5.114 |
| P62834 | 3KUC | HMDB0000641 | 5.113 |
| Q9Y2R2 | 2P6X | HMDB0000122 | 5.112 |
| P31749 | 2UZS | HMDB0000122 | 5.112 |
| P05019 | 1H02 | HMDB0000123 | 5.111 |
| P00450 | 2J5W | HMDB0000122 | 5.111 |
| P01116 | 1N4R | HMDB0000123 | 5.11  |
| Q15067 | 1W07 | HMDB0000190 | 5.109 |
| Q8NFD5 | 2EH9 | HMDB0000099 | 5.108 |
| P02787 | 1DAN | HMDB0000641 | 5.107 |
| P05067 | 2FK3 | HMDB0000641 | 5.107 |
| P01584 | 2NVH | HMDB0000161 | 5.107 |
| P42336 | 3HHM | HMDB0001494 | 5.106 |
| P16220 | 1DH3 | HMDB0004610 | 5.104 |
| P27338 | 1OJA | HMDB0000641 | 5.104 |
| P00441 | 1HL5 | HMDB0000122 | 5.103 |
| Q06787 | 2QND | HMDB0000161 | 5.103 |
| P06280 | 3HG3 | HMDB0000122 | 5.103 |
| Q9Y617 | 3E77 | HMDB0000641 | 5.102 |
| Q99259 | 2OKJ | HMDB0000641 | 5.101 |
| Q9UBK2 | 1XB7 | HMDB0034146 | 5.095 |
| P01112 | 1NVU | HMDB0000122 | 5.093 |
| P08397 | 3ECR | HMDB0000641 | 5.093 |
| Q9UBP0 | 3B9P | HMDB0000122 | 5.092 |
| P29475 | 1F20 | HMDB0000641 | 5.088 |



|        |      |             |       |
|--------|------|-------------|-------|
| P04062 | 2NT0 | HMDB0000161 | 5.088 |
| P60568 | 1PY2 | HMDB0034146 | 5.087 |
| P21397 | 2Z5Y | HMDB0000641 | 5.085 |
| P41159 | 3IIQ | HMDB0000122 | 5.082 |
| P01579 | 1EKU | HMDB0000161 | 5.077 |
| P27361 | 3FXW | HMDB0000641 | 5.077 |
| Q03431 | 3L2J | HMDB0003681 | 5.077 |
| P27338 | 1OJA | HMDB0003681 | 5.076 |
| P02741 | 1CGP | HMDB0000190 | 5.072 |
| P36551 | 2AEX | HMDB0000883 | 5.072 |
| P01303 | 1R9N | HMDB0000122 | 5.071 |
| P06850 | 1MO1 | HMDB0000122 | 5.068 |
| P20783 | 1BND | HMDB0034146 | 5.067 |
| P23560 | 1BND | HMDB0034146 | 5.067 |
| P00441 | 1HL5 | HMDB0000123 | 5.067 |
| P01589 | 3IU3 | HMDB0002329 | 5.067 |
| P01589 | 3IU3 | HMDB0034146 | 5.065 |
| Q8NER1 | 2NYJ | HMDB0000122 | 5.062 |
| P16220 | 1DH3 | HMDB0000122 | 5.059 |
| Q15303 | 2AHX | HMDB0000161 | 5.059 |
| Q9Y243 | 2X18 | HMDB0000099 | 5.057 |
| P27487 | 1W1I | HMDB0000122 | 5.056 |
| O15146 | 2IEP | HMDB0034146 | 5.055 |
| Q5S007 | 3D6T | HMDB0000122 | 5.055 |
| P01589 | 3IU3 | HMDB0000122 | 5.055 |
| P16220 | 1DH3 | HMDB0034146 | 5.052 |
| P01308 | 1EVR | HMDB0000641 | 5.052 |
| Q9NQC3 | 1OZN | HMDB0000122 | 5.052 |
| P04049 | 3CU8 | HMDB0000641 | 5.051 |
| P01127 | 3MJG | HMDB0000161 | 5.051 |
| P02787 | 1DAN | HMDB0000099 | 5.05  |
| P04150 | 1P93 | HMDB0000925 | 5.05  |
| P00441 | 1HL5 | HMDB0000161 | 5.049 |
| Q06787 | 2QND | HMDB0000641 | 5.049 |
| P04150 | 1P93 | HMDB0003681 | 5.048 |
| Q9Y243 | 2X18 | HMDB0000641 | 5.048 |
| P62834 | 3KUC | HMDB0000099 | 5.048 |
| Q16620 | 1HCF | HMDB0000099 | 5.047 |
| P07949 | 2IVS | HMDB0000641 | 5.047 |
| P78504 | 2VJ2 | HMDB0000161 | 5.047 |
| Q15465 | 3M1N | HMDB0000122 | 5.047 |
| P27361 | 3FXW | HMDB0000161 | 5.046 |
| P01241 | 1AXI | HMDB0000122 | 5.044 |
| P10912 | 1AXI | HMDB0000122 | 5.044 |
| Q14203 | 2HL5 | HMDB0000122 | 5.044 |
| P42345 | 4FAP | HMDB0000161 | 5.044 |
| Q9NQC3 | 1OZN | HMDB0034146 | 5.043 |
| P30793 | 1N3T | HMDB0000641 | 5.041 |
| P55072 | 1Y8E | HMDB0000190 | 5.041 |
| P42858 | 3IO4 | HMDB0000122 | 5.041 |
| P02768 | 1E7A | HMDB0003681 | 5.04  |
| P21802 | 1DJS | HMDB0000641 | 5.039 |
| P04271 | 2H61 | HMDB0000641 | 5.039 |
| P51608 | 3C2I | HMDB0000122 | 5.039 |
| Q7LG56 | 3HF1 | HMDB0034146 | 5.037 |
| P15056 | 3II5 | HMDB0000161 | 5.035 |
| P78509 | 2DDU | HMDB0000122 | 5.034 |
| P21333 | 2WFN | HMDB0000122 | 5.034 |
| P08069 | 3F5P | HMDB0000925 | 5.034 |
| P01241 | 1AXI | HMDB0000123 | 5.033 |
| P10912 | 1AXI | HMDB0000123 | 5.033 |
| Q30201 | 1DEA | HMDB0003681 | 5.033 |
| O43612 | 1UV0 | HMDB0034146 | 5.033 |
| P28329 | 2FY3 | HMDB0000123 | 5.031 |
| P01589 | 3IU3 | HMDB0000190 | 5.03  |
| P01920 | 1UVQ | HMDB0004610 | 5.027 |
| P20783 | 1BND | HMDB0000123 | 5.026 |
| P23560 | 1BND | HMDB0000123 | 5.026 |
| P08833 | 1ZT3 | HMDB0000161 | 5.026 |

|        |      |             |       |
|--------|------|-------------|-------|
| P21397 | 2Z5Y | HMDB0001494 | 5.026 |
| P35637 | 1G5G | HMDB0000122 | 5.021 |
| P28482 | 1PME | HMDB0000123 | 5.021 |
| P16435 | 3FJO | HMDB0000099 | 5.02  |
| P22301 | 2ILK | HMDB0004610 | 5.018 |
| P08069 | 3F5P | HMDB0000099 | 5.018 |
| P01308 | 1EVR | HMDB0000161 | 5.017 |
| P05067 | 2FK3 | HMDB0000161 | 5.016 |
| Q9BYW2 | 3H6L | HMDB0000123 | 5.015 |
| P06280 | 3HG3 | HMDB0000099 | 5.015 |
| P05019 | 1H02 | HMDB0000190 | 5.013 |
| P16278 | 1BOB | HMDB0000641 | 5.012 |
| Q16620 | 1HCF | HMDB0000161 | 5.011 |
| P39905 | 2V5E | HMDB0000161 | 5.011 |
| Q9BYW2 | 3H6L | HMDB0000925 | 5.011 |
| P42336 | 3HHM | HMDB0000641 | 5.006 |
| O00555 | 3BXK | HMDB0000161 | 5.004 |
| P05019 | 1H02 | HMDB0034146 | 5.003 |
| Q99700 | 3KTR | HMDB0034146 | 5.002 |
| P09619 | 1GQ5 | HMDB0000161 | 5.001 |
| P20783 | 1BND | HMDB0000190 | 5     |
| P23560 | 1BND | HMDB0000190 | 5     |
| O43612 | 1UV0 | HMDB0000161 | 4.998 |
| Q13255 | 1EWT | HMDB0000122 | 4.994 |
| Q06124 | 2SHP | HMDB0000190 | 4.994 |
| Q16620 | 1HCF | HMDB0000641 | 4.993 |
| Q99700 | 3KTR | HMDB0002329 | 4.992 |
| P15289 | 2AIJ | HMDB0000122 | 4.989 |
| P60568 | 1PY2 | HMDB0000190 | 4.988 |
| P11362 | 1CVS | HMDB0000161 | 4.987 |
| P28482 | 1PME | HMDB0000641 | 4.987 |
| P12821 | 1UZE | HMDB0000190 | 4.987 |
| P21964 | 3HVH | HMDB0000161 | 4.986 |
| P01116 | 1N4R | HMDB0000161 | 4.984 |
| P01112 | 1NVU | HMDB0000641 | 4.984 |
| P26358 | 3EPZ | HMDB0000641 | 4.982 |
| Q99497 | 1PDW | HMDB0000099 | 4.981 |
| P02787 | 1DAN | HMDB0000161 | 4.98  |
| P22301 | 2ILK | HMDB0000122 | 4.979 |
| P27986 | 1H9O | HMDB0000925 | 4.977 |
| P43354 | 1OVL | HMDB0000161 | 4.977 |
| Q9Y243 | 2X18 | HMDB0000161 | 4.977 |
| P26358 | 3EPZ | HMDB0000161 | 4.976 |
| P04271 | 2H61 | HMDB0000161 | 4.975 |
| P15056 | 3II5 | HMDB0000123 | 4.975 |
| P68871 | 1BAB | HMDB0002329 | 4.973 |
| Q06124 | 2SHP | HMDB0002329 | 4.971 |
| Q8NFD5 | 2EH9 | HMDB0000641 | 4.968 |
| P29475 | 1F20 | HMDB0000099 | 4.967 |
| P10082 | 2ZA5 | HMDB0000161 | 4.967 |
| P11274 | 1K1F | HMDB0000161 | 4.966 |
| P01920 | 1UVQ | HMDB0000122 | 4.964 |
| P51659 | 1IKT | HMDB0000641 | 4.962 |
| Q13936 | 1T0J | HMDB0004610 | 4.962 |
| P01375 | 2AZ5 | HMDB0000161 | 4.962 |
| P42336 | 3HHM | HMDB0000161 | 4.962 |
| P31749 | 2UZS | HMDB0000161 | 4.959 |
| P01303 | 1R9N | HMDB0000161 | 4.954 |
| Q5S007 | 3D6T | HMDB0000161 | 4.953 |
| P02787 | 1DAN | HMDB0000123 | 4.951 |
| P23771 | 3DFV | HMDB0000641 | 4.951 |
| P08397 | 3ECR | HMDB0000190 | 4.951 |
| P01308 | 1EVR | HMDB0000123 | 4.949 |
| P29475 | 1F20 | HMDB0000161 | 4.949 |
| P49917 | 3II6 | HMDB0001494 | 4.948 |
| P16278 | 1BOB | HMDB0000161 | 4.945 |
| P04062 | 2NT0 | HMDB0000190 | 4.944 |
| P60484 | 1D5R | HMDB0000641 | 4.942 |
| P21397 | 2Z5Y | HMDB0000097 | 4.941 |

|        |      |             |       |
|--------|------|-------------|-------|
| P03372 | 1HCQ | HMDB0000641 | 4.939 |
| Q9UBK2 | 1XB7 | HMDB0002329 | 4.939 |
| Q99497 | 1PDW | HMDB0000641 | 4.937 |
| P42345 | 4FAP | HMDB0000925 | 4.934 |
| Q9Y617 | 3E77 | HMDB0003681 | 4.933 |
| Q13255 | 1EWT | HMDB0000190 | 4.932 |
| P42336 | 3HHM | HMDB0000123 | 4.932 |
| P14416 | 2HLB | HMDB0000190 | 4.931 |
| P36551 | 2AEX | HMDB0000097 | 4.93  |
| P05231 | 1ALU | HMDB0000161 | 4.929 |
| P21359 | 2D4Q | HMDB0000123 | 4.929 |
| P42858 | 3IO4 | HMDB0034146 | 4.929 |
| P54098 | 1A1V | HMDB0000925 | 4.928 |
| P16435 | 3FJO | HMDB0000161 | 4.926 |
| P51659 | 1IKT | HMDB0000123 | 4.925 |
| P60484 | 1D5R | HMDB0000161 | 4.924 |
| P01579 | 1EKU | HMDB0002329 | 4.924 |
| P05067 | 2FK3 | HMDB0000123 | 4.924 |
| P01241 | 1AXI | HMDB0034146 | 4.923 |
| P10912 | 1AXI | HMDB0034146 | 4.923 |
| P15289 | 2AIJ | HMDB0002329 | 4.921 |
| P01241 | 1AXI | HMDB0000190 | 4.92  |
| P10912 | 1AXI | HMDB0000190 | 4.92  |
| Q13255 | 1EWT | HMDB0002329 | 4.917 |
| P35637 | 1G5G | HMDB0000123 | 4.917 |
| P03372 | 1HCQ | HMDB0000123 | 4.917 |
| P06850 | 1MOI | HMDB0000161 | 4.917 |
| Q02750 | 3EQC | HMDB0000161 | 4.916 |
| P51608 | 3C2I | HMDB0034146 | 4.914 |
| P01112 | 1NVU | HMDB0000161 | 4.912 |
| Q06124 | 2SHP | HMDB0000883 | 4.912 |
| P78509 | 2DDU | HMDB0000123 | 4.91  |
| P35520 | 1M54 | HMDB0002329 | 4.909 |
| Q15303 | 2AHX | HMDB0034146 | 4.909 |
| P10082 | 2ZA5 | HMDB0001494 | 4.908 |
| P27338 | 1OJA | HMDB0000097 | 4.907 |
| P12821 | 1UZE | HMDB0002329 | 4.906 |
| P04049 | 3CU8 | HMDB0000925 | 4.906 |
| P11362 | 1CVS | HMDB0002329 | 4.905 |
| P06280 | 3HG3 | HMDB0000161 | 4.905 |
| P11362 | 1CVS | HMDB0000641 | 4.904 |
| Q14203 | 2HL5 | HMDB0000123 | 4.902 |
| P10082 | 2ZA5 | HMDB0000925 | 4.9   |
| P15056 | 3II5 | HMDB0002329 | 4.899 |
| P04637 | 1GZH | HMDB0000161 | 4.896 |
| P54098 | 1A1V | HMDB0000123 | 4.895 |
| P05231 | 1ALU | HMDB0002329 | 4.894 |
| P01375 | 2AZ5 | HMDB0000641 | 4.892 |
| P27487 | 1W1I | HMDB0034146 | 4.891 |
| P08833 | 1ZT3 | HMDB0000099 | 4.891 |
| P60568 | 1PY2 | HMDB0002329 | 4.89  |
| P29475 | 1F20 | HMDB0002329 | 4.887 |
| P01241 | 1AXI | HMDB0000161 | 4.886 |
| P10912 | 1AXI | HMDB0000161 | 4.886 |
| P00441 | 1HL5 | HMDB0000641 | 4.886 |
| P03372 | 1HCQ | HMDB0000161 | 4.885 |
| Q06787 | 2QND | HMDB0002329 | 4.885 |
| P02787 | 1DAN | HMDB0001494 | 4.883 |
| Q16620 | 1HCF | HMDB0002329 | 4.882 |
| P01270 | 3C4M | HMDB0000190 | 4.882 |
| P54098 | 1A1V | HMDB0002329 | 4.881 |
| P31749 | 2UZS | HMDB0002329 | 4.878 |
| P01270 | 3C4M | HMDB0002329 | 4.878 |
| P01584 | 2NVH | HMDB0000190 | 4.876 |
| Q9BYW2 | 3H6L | HMDB0002329 | 4.873 |
| P04637 | 1GZH | HMDB0000641 | 4.872 |
| Q8NFD5 | 2EH9 | HMDB0000161 | 4.87  |
| Q14203 | 2HL5 | HMDB0034146 | 4.866 |
| Q15465 | 3M1N | HMDB0000161 | 4.866 |

|        |      |             |       |
|--------|------|-------------|-------|
| P39905 | 2V5E | HMDB0002329 | 4.865 |
| P62834 | 3KUC | HMDB0000161 | 4.863 |
| P42345 | 4FAP | HMDB0002329 | 4.862 |
| P16435 | 3FJO | HMDB0002329 | 4.861 |
| P42336 | 3HHM | HMDB0002329 | 4.861 |
| Q9UBK2 | 1XB7 | HMDB0000190 | 4.86  |
| P04049 | 3CU8 | HMDB0002329 | 4.86  |
| P01584 | 2NVH | HMDB0002329 | 4.859 |
| Q8NER1 | 2NYJ | HMDB0000161 | 4.856 |
| P16278 | 1BOB | HMDB0000123 | 4.855 |
| Q99259 | 2OKJ | HMDB0000883 | 4.855 |
| Q06787 | 2QND | HMDB0000123 | 4.854 |
| Q30201 | 1DEA | HMDB0002329 | 4.853 |
| P08069 | 3F5P | HMDB0000161 | 4.853 |
| Q7LG56 | 3HF1 | HMDB0002329 | 4.853 |
| P01127 | 3MJG | HMDB0002329 | 4.853 |
| P04049 | 3CU8 | HMDB0000190 | 4.85  |
| P62834 | 3KUC | HMDB0002329 | 4.849 |
| P60568 | 1PY2 | HMDB0000123 | 4.845 |
| P01584 | 2NVH | HMDB0000123 | 4.844 |
| P11274 | 1K1F | HMDB0000099 | 4.842 |
| P27338 | 1OJA | HMDB0000883 | 4.842 |
| P27338 | 1OJA | HMDB0000190 | 4.841 |
| P43354 | 1OVL | HMDB0000925 | 4.841 |
| Q14203 | 2HL5 | HMDB0000190 | 4.841 |
| P27986 | 1H9O | HMDB0000161 | 4.84  |
| P06850 | 1MO1 | HMDB0034146 | 4.84  |
| O43612 | 1UV0 | HMDB0002329 | 4.84  |
| P23771 | 3DFV | HMDB0000161 | 4.839 |
| P41159 | 3IIQ | HMDB0000161 | 4.838 |
| P04637 | 1GZH | HMDB0000099 | 4.837 |
| P01116 | 1N4R | HMDB0000097 | 4.837 |
| P00450 | 2J5W | HMDB0002329 | 4.836 |
| Q9UBP0 | 3B9P | HMDB0000641 | 4.836 |
| O00555 | 3BXX | HMDB0002329 | 4.835 |
| Q9Y617 | 3E77 | HMDB0000190 | 4.834 |
| Q30201 | 1DEA | HMDB0000190 | 4.834 |
| P49917 | 3II6 | HMDB0000641 | 4.834 |
| P04271 | 2H61 | HMDB0002329 | 4.833 |
| P31749 | 2UZS | HMDB0000190 | 4.83  |
| P01579 | 1EKU | HMDB0000190 | 4.828 |
| P27986 | 1H9O | HMDB0000099 | 4.824 |
| P04150 | 1P93 | HMDB0000161 | 4.824 |
| P04062 | 2NT0 | HMDB0000123 | 4.824 |
| Q06787 | 2QND | HMDB0000190 | 4.823 |
| Q9Y243 | 2X18 | HMDB0000190 | 4.823 |
| P26358 | 3EPZ | HMDB0000190 | 4.822 |
| Q08499 | 1MKD | HMDB0001494 | 4.821 |
| P05231 | 1ALU | HMDB0000190 | 4.819 |
| Q13936 | 1T0J | HMDB0000122 | 4.819 |
| P17612 | 3MVJ | HMDB0000883 | 4.819 |
| P01241 | 1AXI | HMDB0002329 | 4.818 |
| P10912 | 1AXI | HMDB0002329 | 4.818 |
| Q30201 | 1DEA | HMDB0000883 | 4.818 |
| P01112 | 1NVU | HMDB0000123 | 4.818 |
| O15146 | 2IEP | HMDB0000161 | 4.817 |
| P05067 | 2FK3 | HMDB0001494 | 4.816 |
| P11362 | 1CVS | HMDB0000190 | 4.815 |
| O43612 | 1UV0 | HMDB0000123 | 4.815 |
| O00555 | 3BXX | HMDB0000190 | 4.815 |
| P07949 | 2IVS | HMDB0002329 | 4.814 |
| Q9NQC3 | 1OZN | HMDB0000123 | 4.813 |
| Q9Y2R2 | 2P6X | HMDB0000641 | 4.813 |
| P01579 | 1EKU | HMDB0000641 | 4.812 |
| P04278 | 1LHV | HMDB0002329 | 4.811 |
| P14902 | 2D0T | HMDB0000190 | 4.811 |
| P09619 | 1GQ5 | HMDB0000641 | 4.81  |
| P60484 | 1D5R | HMDB0000925 | 4.808 |
| Q16620 | 1HCF | HMDB0000190 | 4.806 |

|        |      |             |       |
|--------|------|-------------|-------|
| P27361 | 3FXW | HMDB0002329 | 4.805 |
| P55072 | 1Y8E | HMDB0002329 | 4.803 |
| P04637 | 1GZH | HMDB0000123 | 4.802 |
| P11274 | 1K1F | HMDB0000641 | 4.799 |
| P01138 | 1SG1 | HMDB0000925 | 4.798 |
| P22301 | 2ILK | HMDB0034146 | 4.798 |
| P27986 | 1H9O | HMDB0002329 | 4.797 |
| P04637 | 1GZH | HMDB0002329 | 4.796 |
| Q15067 | 1W07 | HMDB0000883 | 4.795 |
| P21359 | 2D4Q | HMDB0003681 | 4.794 |
| P35637 | 1G5G | HMDB0002329 | 4.793 |
| Q99259 | 2OKJ | HMDB0000097 | 4.793 |
| P04278 | 1LHV | HMDB0000883 | 4.792 |
| Q9Y2R2 | 2P6X | HMDB0000099 | 4.79  |
| P39905 | 2V5E | HMDB0000123 | 4.789 |
| P09619 | 1GQ5 | HMDB0000099 | 4.788 |
| P02741 | 1CGP | HMDB0000883 | 4.786 |
| P11362 | 1CVS | HMDB0000123 | 4.785 |
| P08833 | 1ZT3 | HMDB0000190 | 4.785 |
| P04150 | 1P93 | HMDB0000123 | 4.783 |
| P05231 | 1ALU | HMDB0000641 | 4.782 |
| Q99497 | 1PDW | HMDB0002329 | 4.782 |
| Q13936 | 1T0J | HMDB0034146 | 4.782 |
| P08833 | 1ZT3 | HMDB0000123 | 4.782 |
| P06280 | 3HG3 | HMDB0000190 | 4.781 |
| P60484 | 1D5R | HMDB0000190 | 4.78  |
| Q8NER1 | 2NYJ | HMDB0000641 | 4.78  |
| P68871 | 1BAB | HMDB0000190 | 4.779 |
| P01112 | 1NVU | HMDB0000925 | 4.774 |
| O00555 | 3BXK | HMDB0000123 | 4.774 |
| P01920 | 1UVQ | HMDB0034146 | 4.773 |
| Q02750 | 3EQC | HMDB0001494 | 4.771 |
| P21333 | 2WFN | HMDB0000641 | 4.77  |
| P54098 | 1A1V | HMDB0000190 | 4.769 |
| P27986 | 1H9O | HMDB0000641 | 4.769 |
| P21802 | 1DJS | HMDB0000190 | 4.766 |
| Q13255 | 1EWT | HMDB0034146 | 4.766 |
| Q5S007 | 3D6T | HMDB0002329 | 4.766 |
| P08397 | 3ECR | HMDB0003681 | 4.766 |
| P10082 | 2ZA5 | HMDB0002329 | 4.765 |
| P29475 | 1F20 | HMDB0000190 | 4.763 |
| P35637 | 1G5G | HMDB0000190 | 4.761 |
| P01127 | 3MJG | HMDB0000123 | 4.761 |
| P16278 | 1BOB | HMDB0000190 | 4.759 |
| Q9UBK2 | 1XB7 | HMDB0000641 | 4.753 |
| P15289 | 2AIJ | HMDB0034146 | 4.753 |
| Q8NER1 | 2NYJ | HMDB0000190 | 4.753 |
| P02741 | 1CGP | HMDB0002329 | 4.752 |
| P01911 | 2WBJ | HMDB0000161 | 4.751 |
| P06850 | 1MO1 | HMDB0000123 | 4.75  |
| Q9Y2R2 | 2P6X | HMDB0000161 | 4.75  |
| Q9Y617 | 3E77 | HMDB0002329 | 4.749 |
| P51659 | 1IKT | HMDB0000190 | 4.749 |
| P01579 | 1EKU | HMDB0000123 | 4.748 |
| P08069 | 3F5P | HMDB0000123 | 4.748 |
| P28329 | 2FY3 | HMDB0000097 | 4.746 |
| P09619 | 1GQ5 | HMDB0000123 | 4.744 |
| P21333 | 2WFN | HMDB0000161 | 4.744 |
| P43354 | 1OVL | HMDB0000123 | 4.742 |
| P42336 | 3HHM | HMDB0000925 | 4.741 |
| Q8NFD5 | 2EH9 | HMDB0000190 | 4.74  |
| Q14203 | 2HL5 | HMDB0002329 | 4.739 |
| Q9Y617 | 3E77 | HMDB0000097 | 4.738 |
| P01112 | 1NVU | HMDB0000190 | 4.732 |
| Q9UBP0 | 3B9P | HMDB0000161 | 4.732 |
| P14902 | 2D0T | HMDB0003681 | 4.73  |
| Q02750 | 3EQC | HMDB0003681 | 4.73  |
| P16435 | 3FJO | HMDB0000925 | 4.729 |
| P02741 | 1CGP | HMDB0000097 | 4.726 |

|        |      |             |       |
|--------|------|-------------|-------|
| P27487 | 1W1I | HMDB0000190 | 4.726 |
| P10082 | 2ZA5 | HMDB0000190 | 4.725 |
| P51608 | 3C2I | HMDB0002329 | 4.725 |
| P42858 | 3IO4 | HMDB0002329 | 4.725 |
| P06850 | 1MO1 | HMDB0002329 | 4.723 |
| P36551 | 2AEX | HMDB0002329 | 4.723 |
| P51659 | 1IKT | HMDB0003681 | 4.722 |
| P41159 | 3IIQ | HMDB0002329 | 4.722 |
| P78509 | 2DDU | HMDB0002329 | 4.721 |
| P00441 | 1HL5 | HMDB0002329 | 4.719 |
| P27986 | 1H9O | HMDB0000123 | 4.715 |
| P06850 | 1MO1 | HMDB0000190 | 4.713 |
| O15146 | 2IEP | HMDB0000123 | 4.712 |
| P04271 | 2H61 | HMDB0000123 | 4.709 |
| P08069 | 3F5P | HMDB0002329 | 4.704 |
| P01303 | 1R9N | HMDB0000123 | 4.703 |
| P16435 | 3FJO | HMDB0000123 | 4.703 |
| P42345 | 4FAP | HMDB0000123 | 4.698 |
| P00450 | 2J5W | HMDB0000099 | 4.697 |
| P00450 | 2J5W | HMDB0000641 | 4.696 |
| P01375 | 2AZ5 | HMDB0000123 | 4.692 |
| P01138 | 1SG1 | HMDB0000161 | 4.685 |
| P68871 | 1BAB | HMDB0003681 | 4.683 |
| P01116 | 1N4R | HMDB0000883 | 4.683 |
| P55072 | 1Y8E | HMDB0034146 | 4.682 |
| P08833 | 1ZT3 | HMDB0000641 | 4.682 |
| P28482 | 1PME | HMDB0003681 | 4.679 |
| P42858 | 3IO4 | HMDB0000190 | 4.678 |
| Q15465 | 3M1N | HMDB0000123 | 4.675 |
| Q16620 | 1HCF | HMDB0000123 | 4.674 |
| P78509 | 2DDU | HMDB0000190 | 4.672 |
| Q9NQC3 | 1OZN | HMDB0000190 | 4.671 |
| P04271 | 2H61 | HMDB0003681 | 4.67  |
| P21333 | 2WFN | HMDB0000190 | 4.67  |
| Q9Y243 | 2X18 | HMDB0000123 | 4.668 |
| Q08499 | 1MKD | HMDB0000097 | 4.667 |
| P04278 | 1LHV | HMDB0000097 | 4.665 |
| P49917 | 3II6 | HMDB0000161 | 4.664 |
| P05231 | 1ALU | HMDB0000099 | 4.661 |
| P02768 | 1E7A | HMDB0000097 | 4.661 |
| P04278 | 1LHV | HMDB0000190 | 4.66  |
| P01138 | 1SG1 | HMDB0000097 | 4.659 |
| Q08499 | 1MKD | HMDB0000883 | 4.655 |
| P62834 | 3KUC | HMDB0000123 | 4.655 |
| P00441 | 1HL5 | HMDB0000925 | 4.65  |
| P01911 | 2WBJ | HMDB0000123 | 4.65  |
| P28329 | 2FY3 | HMDB0000883 | 4.648 |
| Q5S007 | 3D6T | HMDB0000123 | 4.645 |
| P31749 | 2UZS | HMDB0000641 | 4.64  |
| P04278 | 1LHV | HMDB0000094 | 4.636 |
| P21359 | 2D4Q | HMDB0000094 | 4.636 |
| Q9Y2R2 | 2P6X | HMDB0000190 | 4.636 |
| Q9Y2R2 | 2P6X | HMDB0002329 | 4.634 |
| P16220 | 1DH3 | HMDB0000123 | 4.633 |
| P39905 | 2V5E | HMDB0000099 | 4.633 |
| P60484 | 1D5R | HMDB0000123 | 4.63  |
| P01116 | 1N4R | HMDB0000094 | 4.629 |
| P04150 | 1P93 | HMDB0000094 | 4.627 |
| P36551 | 2AEX | HMDB0060348 | 4.625 |
| P05231 | 1ALU | HMDB0000123 | 4.623 |
| P39905 | 2V5E | HMDB0000641 | 4.62  |
| P41159 | 3IIQ | HMDB0000123 | 4.618 |
| P26358 | 3EPZ | HMDB0000123 | 4.615 |
| P29475 | 1F20 | HMDB0000123 | 4.611 |
| Q9UBP0 | 3B9P | HMDB0000190 | 4.61  |
| P21397 | 2Z5Y | HMDB0002329 | 4.608 |
| P01584 | 2NVH | HMDB0000099 | 4.605 |
| P02768 | 1E7A | HMDB0000094 | 4.604 |
| Q8NER1 | 2NYJ | HMDB0000123 | 4.602 |

|        |      |             |       |
|--------|------|-------------|-------|
| P04150 | 1P93 | HMDB0060348 | 4.599 |
| P35520 | 1M54 | HMDB0003681 | 4.598 |
| P04278 | 1LHV | HMDB0060348 | 4.595 |
| P41159 | 3IIQ | HMDB0000641 | 4.595 |
| Q06124 | 2SHP | HMDB0000097 | 4.594 |
| Q03431 | 3L2J | HMDB0060348 | 4.593 |
| Q15067 | 1W07 | HMDB0000097 | 4.592 |
| P27986 | 1H9O | HMDB0000190 | 4.585 |
| P30793 | 1N3T | HMDB0000097 | 4.585 |
| P01138 | 1SG1 | HMDB0000883 | 4.582 |
| Q9BYW2 | 3H6L | HMDB0000094 | 4.578 |
| P00441 | 1HL5 | HMDB0000190 | 4.577 |
| Q9Y617 | 3E77 | HMDB0000883 | 4.573 |
| P06280 | 3HG3 | HMDB0000123 | 4.571 |
| P02768 | 1E7A | HMDB0000883 | 4.57  |
| P27338 | 1OJA | HMDB0000161 | 4.57  |
| Q15465 | 3M1N | HMDB0000641 | 4.57  |
| P11274 | 1K1F | HMDB0000123 | 4.568 |
| P10145 | 1QE6 | HMDB0000641 | 4.565 |
| P27361 | 3FXW | HMDB0000883 | 4.565 |
| P21802 | 1DJS | HMDB0000883 | 4.564 |
| P21964 | 3HVH | HMDB0000883 | 4.559 |
| P01270 | 3C4M | HMDB0060348 | 4.554 |
| Q9BYW2 | 3H6L | HMDB0000190 | 4.55  |
| P01911 | 2WBJ | HMDB0000641 | 4.546 |
| Q30201 | 1DEA | HMDB0060348 | 4.545 |
| P14416 | 2HLB | HMDB0000097 | 4.542 |
| Q30201 | 1DEA | HMDB0000097 | 4.535 |
| P28329 | 2FY3 | HMDB0060348 | 4.535 |
| Q08499 | 1MKD | HMDB0060348 | 4.534 |
| P21359 | 2D4Q | HMDB0060348 | 4.531 |
| P23771 | 3DFV | HMDB0000123 | 4.53  |
| P42336 | 3HHM | HMDB0003681 | 4.527 |
| Q8NFD5 | 2EH9 | HMDB0000123 | 4.525 |
| P21397 | 2Z5Y | HMDB0060348 | 4.524 |
| Q30201 | 1DEA | HMDB0000094 | 4.523 |
| P42336 | 3HHM | HMDB0000094 | 4.518 |
| P08397 | 3ECR | HMDB0000097 | 4.516 |
| P04062 | 2NT0 | HMDB0000099 | 4.512 |
| P01303 | 1R9N | HMDB0000641 | 4.511 |
| Q99259 | 2OKJ | HMDB0060348 | 4.508 |
| P01308 | 1EVR | HMDB0000094 | 4.507 |
| O15146 | 2IEP | HMDB0000641 | 4.506 |
| P21802 | 1DJS | HMDB0060348 | 4.5   |
| Q03431 | 3L2J | HMDB0000883 | 4.499 |
| P02768 | 1E7A | HMDB0060348 | 4.491 |
| P08397 | 3ECR | HMDB0000883 | 4.491 |
| P14416 | 2HLB | HMDB0000883 | 4.489 |
| Q06124 | 2SHP | HMDB0060348 | 4.489 |
| P27361 | 3FXW | HMDB0000094 | 4.488 |
| P27338 | 1OJA | HMDB0060348 | 4.487 |
| Q15067 | 1W07 | HMDB0060348 | 4.481 |
| P68871 | 1BAB | HMDB0060348 | 4.48  |
| P30793 | 1N3T | HMDB0000883 | 4.479 |
| P49917 | 3II6 | HMDB0000190 | 4.479 |
| P02787 | 1DAN | HMDB0003681 | 4.478 |
| P01308 | 1EVR | HMDB0060348 | 4.477 |
| P28482 | 1PME | HMDB0060348 | 4.477 |
| O43612 | 1UV0 | HMDB0000099 | 4.477 |
| P15056 | 3II5 | HMDB0003681 | 4.474 |
| P21333 | 2WFN | HMDB0000123 | 4.473 |
| P01308 | 1EVR | HMDB0001494 | 4.467 |
| P01308 | 1EVR | HMDB0000883 | 4.462 |
| P10145 | 1QE6 | HMDB0000099 | 4.462 |
| P28482 | 1PME | HMDB0000094 | 4.457 |
| Q9Y617 | 3E77 | HMDB0060348 | 4.455 |
| P36551 | 2AEX | HMDB0000094 | 4.454 |
| Q08499 | 1MKD | HMDB0000094 | 4.453 |
| P04150 | 1P93 | HMDB0000883 | 4.452 |

|        |      |             |       |
|--------|------|-------------|-------|
| P10082 | 2ZA5 | HMDB0003681 | 4.451 |
| P01270 | 3C4M | HMDB0000097 | 4.451 |
| P21964 | 3HVH | HMDB0000094 | 4.447 |
| P04637 | 1GZH | HMDB0000190 | 4.446 |
| P27361 | 3FXW | HMDB0060348 | 4.446 |
| P27361 | 3FXW | HMDB0000097 | 4.445 |
| P42336 | 3HHM | HMDB0000190 | 4.444 |
| P01138 | 1SG1 | HMDB0000123 | 4.442 |
| Q08499 | 1MKD | HMDB0000190 | 4.439 |
| P01270 | 3C4M | HMDB0000094 | 4.433 |
| Q15465 | 3M1N | HMDB0000099 | 4.431 |
| Q5S007 | 3D6T | HMDB0000099 | 4.43  |
| P21802 | 1DJS | HMDB0000094 | 4.428 |
| P30793 | 1N3T | HMDB0060348 | 4.426 |
| P21964 | 3HVH | HMDB0060348 | 4.425 |
| P51659 | 1IKT | HMDB0000094 | 4.421 |
| O43612 | 1UV0 | HMDB0000641 | 4.421 |
| Q15303 | 2AHX | HMDB0000641 | 4.421 |
| P14902 | 2D0T | HMDB0000094 | 4.421 |
| Q7LG56 | 3HF1 | HMDB0000641 | 4.419 |
| P15056 | 3II5 | HMDB0000094 | 4.415 |
| P01138 | 1SG1 | HMDB0060348 | 4.411 |
| P12821 | 1UZE | HMDB0000097 | 4.409 |
| P04271 | 2H61 | HMDB0000094 | 4.409 |
| P01589 | 3IU3 | HMDB0000099 | 4.407 |
| P05067 | 2FK3 | HMDB0000094 | 4.405 |
| Q02750 | 3EQC | HMDB0000094 | 4.4   |
| Q03431 | 3L2J | HMDB0000097 | 4.395 |
| P68871 | 1BAB | HMDB0000094 | 4.386 |
| Q06124 | 2SHP | HMDB0000094 | 4.384 |
| P07949 | 2IVS | HMDB0060348 | 4.383 |
| Q03431 | 3L2J | HMDB0000094 | 4.382 |
| P28329 | 2FY3 | HMDB0001494 | 4.38  |
| P17612 | 3MVJ | HMDB0000094 | 4.377 |
| P01308 | 1EVR | HMDB0000097 | 4.371 |
| Q9Y2R2 | 2P6X | HMDB0000123 | 4.364 |
| P08069 | 3F5P | HMDB0000094 | 4.362 |
| Q9UBP0 | 3B9P | HMDB0000123 | 4.357 |
| P01270 | 3C4M | HMDB0000883 | 4.357 |
| P04150 | 1P93 | HMDB0000097 | 4.356 |
| P01112 | 1NVU | HMDB0003681 | 4.355 |
| P35637 | 1G5G | HMDB0000099 | 4.354 |
| P01138 | 1SG1 | HMDB0000094 | 4.35  |
| P68871 | 1BAB | HMDB0000883 | 4.345 |
| P04150 | 1P93 | HMDB0001494 | 4.344 |
| P08397 | 3ECR | HMDB0060348 | 4.344 |
| P08069 | 3F5P | HMDB0000190 | 4.342 |
| P60568 | 1PY2 | HMDB0000099 | 4.336 |
| P28329 | 2FY3 | HMDB0000094 | 4.332 |
| P03372 | 1HCQ | HMDB0003681 | 4.331 |
| P03372 | 1HCQ | HMDB0000190 | 4.327 |
| P05067 | 2FK3 | HMDB0000883 | 4.325 |
| P03372 | 1HCQ | HMDB0000094 | 4.32  |
| P05019 | 1H02 | HMDB0000641 | 4.317 |
| Q99700 | 3KTR | HMDB0000641 | 4.317 |
| P12821 | 1UZE | HMDB0000883 | 4.314 |
| P54098 | 1A1V | HMDB0003681 | 4.31  |
| P23771 | 3DFV | HMDB0000094 | 4.308 |
| P02787 | 1DAN | HMDB0000883 | 4.303 |
| P42345 | 4FAP | HMDB0060348 | 4.302 |
| P27487 | 1W1I | HMDB0000099 | 4.296 |
| Q8NFD5 | 2EH9 | HMDB0003681 | 4.295 |
| Q9NQC3 | 1OZN | HMDB0000099 | 4.292 |
| P08397 | 3ECR | HMDB0000094 | 4.292 |
| Q02750 | 3EQC | HMDB0060348 | 4.292 |
| P07949 | 2IVS | HMDB0000094 | 4.287 |
| O00555 | 3BXK | HMDB0000641 | 4.282 |
| P14902 | 2D0T | HMDB0000883 | 4.281 |
| P23771 | 3DFV | HMDB0003681 | 4.28  |



|        |      |             |       |
|--------|------|-------------|-------|
| P16220 | 1DH3 | HMDB0000641 | 4.278 |
| P06850 | 1MO1 | HMDB0000099 | 4.274 |
| P04049 | 3CU8 | HMDB0000094 | 4.273 |
| P54098 | 1A1V | HMDB0000094 | 4.271 |
| P02787 | 1DAN | HMDB0000094 | 4.271 |
| P04150 | 1P93 | HMDB0002329 | 4.27  |
| P04049 | 3CU8 | HMDB0003681 | 4.268 |
| P14416 | 2HLB | HMDB0000094 | 4.262 |
| Q15067 | 1W07 | HMDB0000094 | 4.261 |
| P01241 | 1AXI | HMDB0000099 | 4.26  |
| P10912 | 1AXI | HMDB0000099 | 4.26  |
| P01308 | 1EVR | HMDB0000190 | 4.26  |
| P07949 | 2IVS | HMDB0000883 | 4.258 |
| P08069 | 3F5P | HMDB0060348 | 4.258 |
| P51608 | 3C2I | HMDB0000099 | 4.254 |
| P30793 | 1N3T | HMDB0000094 | 4.253 |
| P10082 | 2ZA5 | HMDB0000094 | 4.253 |
| P29475 | 1F20 | HMDB0000094 | 4.252 |
| P03372 | 1HCQ | HMDB0002329 | 4.251 |
| Q14203 | 2HL5 | HMDB0000099 | 4.249 |
| P43354 | 1OVL | HMDB0000094 | 4.248 |
| P35637 | 1G5G | HMDB0000641 | 4.247 |
| P42345 | 4FAP | HMDB0000094 | 4.247 |
| P10145 | 1QE6 | HMDB0000094 | 4.246 |
| P03372 | 1HCQ | HMDB0060348 | 4.245 |
| P78504 | 2VJ2 | HMDB0000099 | 4.24  |
| P16278 | 1BOB | HMDB0000094 | 4.237 |
| P01579 | 1EKU | HMDB0000094 | 4.237 |
| P05067 | 2FK3 | HMDB0060348 | 4.234 |
| P05019 | 1H02 | HMDB0000094 | 4.228 |
| P10082 | 2ZA5 | HMDB0060348 | 4.225 |
| P16435 | 3FJO | HMDB0000094 | 4.222 |
| P39905 | 2V5E | HMDB0000094 | 4.219 |
| P60568 | 1PY2 | HMDB0000094 | 4.218 |
| Q13255 | 1EWT | HMDB0000099 | 4.217 |
| P16278 | 1BOB | HMDB0003681 | 4.216 |
| P60484 | 1D5R | HMDB0000094 | 4.214 |
| P02787 | 1DAN | HMDB0060348 | 4.213 |
| Q9BYW2 | 3H6L | HMDB0000883 | 4.213 |
| P27986 | 1H9O | HMDB0000094 | 4.211 |
| P35520 | 1M54 | HMDB0060348 | 4.21  |
| Q99497 | 1PDW | HMDB0000094 | 4.209 |
| P21802 | 1DJS | HMDB0000097 | 4.206 |
| P12821 | 1UZE | HMDB0000094 | 4.206 |
| O15146 | 2IEP | HMDB0000094 | 4.205 |
| P28482 | 1PME | HMDB0000883 | 4.204 |
| P01375 | 2AZ5 | HMDB0000094 | 4.204 |
| Q02750 | 3EQC | HMDB0000883 | 4.2   |
| Q9NQ3  | 1OZN | HMDB0000641 | 4.197 |
| P16220 | 1DH3 | HMDB0000094 | 4.196 |
| P21359 | 2D4Q | HMDB0000883 | 4.196 |
| Q99700 | 3KTR | HMDB0000094 | 4.195 |
| P27487 | 1W1I | HMDB0000641 | 4.194 |
| Q9Y617 | 3E77 | HMDB0000094 | 4.19  |
| P35520 | 1M54 | HMDB0000094 | 4.189 |
| P14902 | 2D0T | HMDB0000097 | 4.188 |
| P11274 | 1K1F | HMDB0003681 | 4.187 |
| P35520 | 1M54 | HMDB0000883 | 4.187 |
| O43612 | 1UV0 | HMDB0000094 | 4.187 |
| P20783 | 1BND | HMDB0000641 | 4.186 |
| P23560 | 1BND | HMDB0000641 | 4.186 |
| P00441 | 1HL5 | HMDB0003681 | 4.186 |
| P01112 | 1NVU | HMDB0000094 | 4.186 |
| P43354 | 1OVL | HMDB0060348 | 4.181 |
| P04062 | 2NT0 | HMDB0000094 | 4.181 |
| P60568 | 1PY2 | HMDB0000641 | 4.18  |
| P01127 | 3MJG | HMDB0000094 | 4.18  |
| Q13255 | 1EWT | HMDB0000094 | 4.179 |
| P01584 | 2NVH | HMDB0000094 | 4.179 |

|        |      |             |       |
|--------|------|-------------|-------|
| P20783 | 1BND | HMDB0000094 | 4.178 |
| P23560 | 1BND | HMDB0000094 | 4.178 |
| O00555 | 3BXK | HMDB0000094 | 4.178 |
| P01589 | 3IU3 | HMDB0000094 | 4.176 |
| Q9UBK2 | 1XB7 | HMDB0000094 | 4.175 |
| P01589 | 3IU3 | HMDB0000641 | 4.175 |
| P78504 | 2VJ2 | HMDB0000094 | 4.174 |
| P51659 | 1IKT | HMDB0000883 | 4.173 |
| Q14203 | 2HL5 | HMDB0000094 | 4.171 |
| Q9Y243 | 2X18 | HMDB0000094 | 4.171 |
| P15289 | 2AIJ | HMDB0000094 | 4.17  |
| P01911 | 2WBJ | HMDB0000094 | 4.17  |
| P62834 | 3KUC | HMDB0000094 | 4.169 |
| Q15303 | 2AHX | HMDB0000094 | 4.167 |
| P51608 | 3C2I | HMDB0000094 | 4.167 |
| P04049 | 3CU8 | HMDB0060348 | 4.166 |
| P08069 | 3F5P | HMDB0000883 | 4.166 |
| P27487 | 1W1I | HMDB0000094 | 4.165 |
| P01920 | 1UVQ | HMDB0000099 | 4.164 |
| P04637 | 1GZH | HMDB0000094 | 4.162 |
| P54098 | 1A1V | HMDB0060348 | 4.161 |
| P01138 | 1SG1 | HMDB0000190 | 4.161 |
| P05231 | 1ALU | HMDB0000094 | 4.158 |
| P42858 | 3IO4 | HMDB0000094 | 4.158 |
| P01241 | 1AXI | HMDB0000094 | 4.157 |
| P10912 | 1AXI | HMDB0000094 | 4.157 |
| Q5S007 | 3D6T | HMDB0000641 | 4.156 |
| P09619 | 1GQ5 | HMDB0000094 | 4.155 |
| Q8NFD5 | 2EH9 | HMDB0000094 | 4.155 |
| P27986 | 1H9O | HMDB0003681 | 4.154 |
| P55072 | 1Y8E | HMDB0000094 | 4.151 |
| Q9NQC3 | 1OZN | HMDB0000094 | 4.15  |
| Q15465 | 3M1N | HMDB0000094 | 4.15  |
| P04271 | 2H61 | HMDB0000883 | 4.147 |
| P23771 | 3DFV | HMDB0060348 | 4.147 |
| P49917 | 3II6 | HMDB0000094 | 4.147 |
| Q9NQC3 | 1OZN | HMDB0003681 | 4.146 |
| P60568 | 1PY2 | HMDB0060348 | 4.145 |
| P02741 | 1CGP | HMDB0000094 | 4.144 |
| P00441 | 1HL5 | HMDB0000094 | 4.142 |
| P06850 | 1MO1 | HMDB0000094 | 4.142 |
| Q7LG56 | 3HF1 | HMDB0000094 | 4.141 |
| P11362 | 1CVS | HMDB0060348 | 4.14  |
| Q5S007 | 3D6T | HMDB0003681 | 4.14  |
| P16278 | 1BOB | HMDB0060348 | 4.138 |
| P04062 | 2NT0 | HMDB0060348 | 4.137 |
| P11362 | 1CVS | HMDB0000094 | 4.136 |
| P01920 | 1UVQ | HMDB0000094 | 4.135 |
| P29475 | 1F20 | HMDB0060348 | 4.134 |
| Q99700 | 3KTR | HMDB0060348 | 4.134 |
| Q9BYW2 | 3H6L | HMDB0000097 | 4.133 |
| P42858 | 3IO4 | HMDB0000641 | 4.133 |
| O15146 | 2IEP | HMDB0060348 | 4.131 |
| Q5S007 | 3D6T | HMDB0000094 | 4.131 |
| P21964 | 3HVH | HMDB0000097 | 4.13  |
| P01584 | 2NVH | HMDB0060348 | 4.129 |
| P01127 | 3MJG | HMDB0060348 | 4.128 |
| P00450 | 2J5W | HMDB0000094 | 4.124 |
| P35637 | 1G5G | HMDB0003681 | 4.122 |
| P05019 | 1H02 | HMDB0060348 | 4.121 |
| P20783 | 1BND | HMDB0060348 | 4.12  |
| P23560 | 1BND | HMDB0060348 | 4.12  |
| P06850 | 1MO1 | HMDB0060348 | 4.118 |
| P31749 | 2UZS | HMDB0000094 | 4.117 |
| P05231 | 1ALU | HMDB0060348 | 4.116 |
| P60484 | 1D5R | HMDB0003681 | 4.116 |
| Q9UBP0 | 3B9P | HMDB0003681 | 4.114 |
| Q7LG56 | 3HF1 | HMDB0060348 | 4.113 |
| O43612 | 1UV0 | HMDB0060348 | 4.112 |

|        |      |             |       |
|--------|------|-------------|-------|
| P01303 | 1R9N | HMDB0003681 | 4.111 |
| P78509 | 2DDU | HMDB0000641 | 4.11  |
| P35637 | 1G5G | HMDB0060348 | 4.109 |
| Q15303 | 2AHX | HMDB0003681 | 4.109 |
| O00555 | 3BXX | HMDB0060348 | 4.108 |
| Q99497 | 1PDW | HMDB0060348 | 4.106 |
| P01589 | 3IU3 | HMDB0060348 | 4.105 |
| P01241 | 1AXI | HMDB0000641 | 4.104 |
| P10912 | 1AXI | HMDB0000641 | 4.104 |
| Q16620 | 1HCF | HMDB0003681 | 4.104 |
| P51608 | 3C2I | HMDB0060348 | 4.102 |
| P42858 | 3IO4 | HMDB0060348 | 4.102 |
| Q16620 | 1HCF | HMDB0000094 | 4.101 |
| Q14203 | 2HL5 | HMDB0000641 | 4.1   |
| P06850 | 1MO1 | HMDB0003681 | 4.099 |
| Q13255 | 1EWT | HMDB0060348 | 4.098 |
| P78504 | 2VJ2 | HMDB0060348 | 4.098 |
| P31749 | 2UZS | HMDB0060348 | 4.097 |
| P05231 | 1ALU | HMDB0003681 | 4.096 |
| P01584 | 2NVH | HMDB0003681 | 4.096 |
| P51608 | 3C2I | HMDB0000641 | 4.096 |
| P60484 | 1D5R | HMDB0060348 | 4.095 |
| P10145 | 1QE6 | HMDB0060348 | 4.094 |
| P06850 | 1MO1 | HMDB0000641 | 4.093 |
| P35637 | 1G5G | HMDB0000094 | 4.091 |
| P68871 | 1BAB | HMDB0000097 | 4.089 |
| P01303 | 1R9N | HMDB0000094 | 4.086 |
| O43612 | 1UV0 | HMDB0003681 | 4.086 |
| P31749 | 2UZS | HMDB0003681 | 4.086 |
| Q9UBK2 | 1XB7 | HMDB0060348 | 4.084 |
| Q06787 | 2QND | HMDB0000094 | 4.084 |
| Q8NER1 | 2NYJ | HMDB0000094 | 4.083 |
| Q5S007 | 3D6T | HMDB0060348 | 4.083 |
| P16220 | 1DH3 | HMDB0060348 | 4.082 |
| P08833 | 1ZT3 | HMDB0003681 | 4.082 |
| P09619 | 1GQ5 | HMDB0060348 | 4.081 |
| P03372 | 1HCO | HMDB0000883 | 4.081 |
| P10082 | 2ZA5 | HMDB0000097 | 4.081 |
| Q14203 | 2HL5 | HMDB0060348 | 4.079 |
| P26358 | 3EPZ | HMDB0000094 | 4.074 |
| P41159 | 3IIQ | HMDB0000094 | 4.074 |
| P78509 | 2DDU | HMDB0000094 | 4.073 |
| Q9NQC3 | 1OZN | HMDB0060348 | 4.071 |
| P01127 | 3MJG | HMDB0000641 | 4.07  |
| Q9Y243 | 2X18 | HMDB0003681 | 4.068 |
| Q13936 | 1T0J | HMDB0000094 | 4.067 |
| P22301 | 2ILK | HMDB0000094 | 4.067 |
| P08833 | 1ZT3 | HMDB0000094 | 4.066 |
| Q8NFD5 | 2EH9 | HMDB0060348 | 4.066 |
| P01911 | 2WBJ | HMDB0060348 | 4.066 |
| P51608 | 3C2I | HMDB0003681 | 4.065 |
| P01911 | 2WBJ | HMDB0003681 | 4.064 |
| Q15465 | 3M1N | HMDB0060348 | 4.063 |
| Q16620 | 1HCF | HMDB0060348 | 4.062 |
| Q14203 | 2HL5 | HMDB0003681 | 4.061 |
| P28329 | 2FY3 | HMDB0002329 | 4.06  |
| P00450 | 2J5W | HMDB0060348 | 4.058 |
| P41159 | 3IIQ | HMDB0060348 | 4.058 |
| P21397 | 2Z5Y | HMDB0000094 | 4.056 |
| P10082 | 2ZA5 | HMDB0000883 | 4.056 |
| P49917 | 3II6 | HMDB0060348 | 4.055 |
| P04062 | 2NT0 | HMDB0003681 | 4.054 |
| P21333 | 2WFN | HMDB0003681 | 4.053 |
| Q9Y2R2 | 2P6X | HMDB0000094 | 4.052 |
| P60568 | 1PY2 | HMDB0003681 | 4.052 |
| P01241 | 1AXI | HMDB0003681 | 4.05  |
| P10912 | 1AXI | HMDB0003681 | 4.05  |
| P78509 | 2DDU | HMDB0060348 | 4.05  |
| P06280 | 3HG3 | HMDB0000094 | 4.05  |

|        |      |             |       |
|--------|------|-------------|-------|
| P16220 | 1DH3 | HMDB0003681 | 4.048 |
| P01579 | 1EKU | HMDB0003681 | 4.047 |
| P05019 | 1H02 | HMDB0003681 | 4.044 |
| P01303 | 1R9N | HMDB0060348 | 4.04  |
| P20783 | 1BND | HMDB0003681 | 4.035 |
| P23560 | 1BND | HMDB0003681 | 4.035 |
| P01579 | 1EKU | HMDB0060348 | 4.035 |
| Q13255 | 1EWT | HMDB0000641 | 4.034 |
| O15146 | 2IEP | HMDB0003681 | 4.032 |
| Q9UBP0 | 3B9P | HMDB0000094 | 4.032 |
| Q13255 | 1EWT | HMDB0003681 | 4.03  |
| P11274 | 1K1F | HMDB0000094 | 4.03  |
| P00441 | 1HL5 | HMDB0060348 | 4.029 |
| P28482 | 1PME | HMDB0000097 | 4.027 |
| Q9UBP0 | 3B9P | HMDB0060348 | 4.025 |
| P03372 | 1HCQ | HMDB0000097 | 4.022 |
| P01920 | 1UVQ | HMDB0003681 | 4.02  |
| P21333 | 2WFN | HMDB0000094 | 4.02  |
| P27338 | 1OJA | HMDB0000094 | 4.019 |
| Q9Y243 | 2X18 | HMDB0060348 | 4.018 |
| P15289 | 2AIJ | HMDB0000641 | 4.013 |
| Q06787 | 2QND | HMDB0003681 | 4.011 |
| P21359 | 2D4Q | HMDB0000097 | 4.01  |
| P08833 | 1ZT3 | HMDB0060348 | 4.008 |
| P01375 | 2AZ5 | HMDB0000883 | 3.999 |
| Q8NER1 | 2NYJ | HMDB0060348 | 3.998 |
| P04049 | 3CU8 | HMDB0000883 | 3.997 |
| P22301 | 2ILK | HMDB0060348 | 3.991 |
| P15056 | 3II5 | HMDB0000883 | 3.99  |
| P42336 | 3HHM | HMDB0000883 | 3.978 |
| P04271 | 2H61 | HMDB0000097 | 3.966 |
| Q9Y2R2 | 2P6X | HMDB0060348 | 3.966 |
| P01920 | 1UVQ | HMDB0000641 | 3.935 |
| Q99259 | 2OKJ | HMDB0000094 | 3.93  |
| Q02750 | 3EQC | HMDB0000097 | 3.929 |
| P01138 | 1SG1 | HMDB0000159 | 3.927 |
| P55072 | 1Y8E | HMDB0000641 | 3.923 |
| P02787 | 1DAN | HMDB0000097 | 3.919 |
| P55072 | 1Y8E | HMDB0003681 | 3.915 |
| P35520 | 1M54 | HMDB0000097 | 3.9   |
| P16278 | 1BOB | HMDB0000883 | 3.892 |
| P42345 | 4FAP | HMDB0000883 | 3.887 |
| P22301 | 2ILK | HMDB0003681 | 3.884 |
| P42336 | 3HHM | HMDB0000097 | 3.868 |
| P51659 | 1IKT | HMDB0000097 | 3.861 |
| P01303 | 1SG1 | HMDB0001494 | 3.857 |
| P00441 | 1HL5 | HMDB0000883 | 3.846 |
| Q99497 | 1PDW | HMDB0000097 | 3.838 |
| P22301 | 2ILK | HMDB0000641 | 3.837 |
| Q8NFD5 | 2EH9 | HMDB0000883 | 3.819 |
| P23771 | 3DFV | HMDB0000883 | 3.819 |
| P62834 | 3KUC | HMDB0000883 | 3.804 |
| P00441 | 1HL5 | HMDB0000097 | 3.797 |
| P49917 | 3II6 | HMDB0000883 | 3.788 |
| P43354 | 1OVL | HMDB0000883 | 3.744 |
| P42345 | 4FAP | HMDB0000097 | 3.741 |
| P01375 | 2AZ5 | HMDB0000097 | 3.737 |
| P01112 | 1NVU | HMDB0000097 | 3.736 |
| P16435 | 3FJO | HMDB0000883 | 3.73  |
| P54098 | 1A1V | HMDB0000097 | 3.728 |
| P23771 | 3DFV | HMDB0000097 | 3.718 |
| P01112 | 1NVU | HMDB0000883 | 3.712 |
| P27986 | 1H9O | HMDB0000883 | 3.709 |
| O15146 | 2IEP | HMDB0000883 | 3.701 |
| P54098 | 1A1V | HMDB0000883 | 3.7   |
| Q13936 | 1T0J | HMDB0000641 | 3.678 |
| P04049 | 3CU8 | HMDB0000097 | 3.675 |
| P15056 | 3II5 | HMDB0000097 | 3.675 |
| Q16620 | 1HCF | HMDB0000883 | 3.671 |

|        |      |             |       |
|--------|------|-------------|-------|
| P04062 | 2NT0 | HMDB0000883 | 3.669 |
| P07949 | 2IVS | HMDB0000097 | 3.666 |
| P04637 | 1GZH | HMDB0000883 | 3.662 |
| Q9UBP0 | 3B9P | HMDB0000883 | 3.65  |
| P11362 | 1CVS | HMDB0000883 | 3.64  |
| P60568 | 1PY2 | HMDB0000883 | 3.637 |
| P16278 | 1BOB | HMDB0000097 | 3.633 |
| P27986 | 1H9O | HMDB0000097 | 3.624 |
| P21333 | 2WFN | HMDB0000883 | 3.617 |
| Q99497 | 1PDW | HMDB0000883 | 3.615 |
| Q7LG56 | 3HF1 | HMDB0000883 | 3.615 |
| P31749 | 2UZS | HMDB0000883 | 3.614 |
| P60484 | 1D5R | HMDB0000883 | 3.613 |
| Q8NER1 | 2NYJ | HMDB0000883 | 3.608 |
| P29475 | 1F20 | HMDB0000883 | 3.605 |
| P27487 | 1W1I | HMDB0000883 | 3.603 |
| O15146 | 2IEP | HMDB0000097 | 3.597 |
| P42858 | 3IO4 | HMDB0000883 | 3.597 |
| P01584 | 2NVH | HMDB0000883 | 3.593 |
| Q99700 | 3KTR | HMDB0000883 | 3.588 |
| P62834 | 3KUC | HMDB0000097 | 3.584 |
| P01303 | 1R9N | HMDB0000883 | 3.583 |
| P39905 | 2V5E | HMDB0000883 | 3.583 |
| P51608 | 3C2I | HMDB0000883 | 3.583 |
| P10145 | 1QE6 | HMDB0000883 | 3.582 |
| P11274 | 1K1F | HMDB0000097 | 3.581 |
| Q06787 | 2QND | HMDB0000883 | 3.579 |
| P26358 | 3EPZ | HMDB0000883 | 3.573 |
| Q9Y243 | 2X18 | HMDB0000883 | 3.572 |
| P01127 | 3MJG | HMDB0000883 | 3.572 |
| P35637 | 1G5G | HMDB0000883 | 3.571 |
| Q15465 | 3M1N | HMDB0000883 | 3.571 |
| P06280 | 3HG3 | HMDB0000883 | 3.57  |
| P16220 | 1DH3 | HMDB0000883 | 3.568 |
| P06850 | 1MO1 | HMDB0000883 | 3.566 |
| P41159 | 3IIQ | HMDB0000883 | 3.566 |
| P01241 | 1AXI | HMDB0000883 | 3.56  |
| P10912 | 1AXI | HMDB0000883 | 3.56  |
| P01911 | 2WBJ | HMDB0000883 | 3.557 |
| P05231 | 1ALU | HMDB0000883 | 3.555 |
| Q5S007 | 3D6T | HMDB0000883 | 3.555 |
| P09619 | 1GQ5 | HMDB0000883 | 3.549 |
| P01579 | 1EKU | HMDB0000883 | 3.547 |
| P05019 | 1H02 | HMDB0000883 | 3.547 |
| P43354 | 1OVL | HMDB0000097 | 3.547 |
| Q9Y2R2 | 2P6X | HMDB0000883 | 3.547 |
| Q9NQC3 | 1OZN | HMDB0000883 | 3.543 |
| P00450 | 2J5W | HMDB0000883 | 3.542 |
| P11274 | 1K1F | HMDB0000883 | 3.54  |
| P08833 | 1ZT3 | HMDB0000883 | 3.537 |
| P49917 | 3II6 | HMDB0000097 | 3.533 |
| P04062 | 2NT0 | HMDB0000097 | 3.531 |
| Q15303 | 2AHX | HMDB0000883 | 3.521 |
| P20783 | 1BND | HMDB0000883 | 3.518 |
| P23560 | 1BND | HMDB0000883 | 3.518 |
| O00555 | 3BXK | HMDB0000883 | 3.516 |
| Q14203 | 2HL5 | HMDB0000883 | 3.511 |
| P11362 | 1CVS | HMDB0000097 | 3.505 |
| P78509 | 2DDU | HMDB0000883 | 3.502 |
| Q9UBK2 | 1XB7 | HMDB0000883 | 3.5   |
| P16435 | 3FJO | HMDB0000097 | 3.487 |
| P01589 | 3IU3 | HMDB0000883 | 3.481 |
| Q9UBP0 | 3B9P | HMDB0000097 | 3.48  |
| P01589 | 3IU3 | HMDB0000097 | 3.476 |
| O43612 | 1UV0 | HMDB0000883 | 3.47  |
| P01584 | 2NVH | HMDB0000097 | 3.469 |
| P15289 | 2AIJ | HMDB0000883 | 3.462 |
| Q13255 | 1EWT | HMDB0000883 | 3.461 |
| Q16620 | 1HCF | HMDB0000097 | 3.461 |

|        |      |             |        |
|--------|------|-------------|--------|
| P10145 | 1QE6 | HMDB0000097 | 3.457  |
| P01920 | 1UVQ | HMDB0000883 | 3.449  |
| P21333 | 2WFN | HMDB0000097 | 3.444  |
| P01303 | 1R9N | HMDB0000097 | 3.44   |
| P35637 | 1G5G | HMDB0000097 | 3.437  |
| P04150 | 1P93 | HMDB0000159 | 3.434  |
| P04637 | 1GZH | HMDB0000097 | 3.433  |
| Q9Y243 | 2X18 | HMDB0000097 | 3.429  |
| P60568 | 1PY2 | HMDB0000097 | 3.425  |
| P29475 | 1F20 | HMDB0000097 | 3.424  |
| Q7LG56 | 3HF1 | HMDB0000097 | 3.422  |
| P60484 | 1D5R | HMDB0000097 | 3.416  |
| P06280 | 3HG3 | HMDB0000097 | 3.404  |
| P01579 | 1EKU | HMDB0000097 | 3.403  |
| P00450 | 2J5W | HMDB0000097 | 3.403  |
| P03372 | 1HCQ | HMDB0000159 | 3.399  |
| P39905 | 2V5E | HMDB0000097 | 3.399  |
| P08833 | 1ZT3 | HMDB0000097 | 3.397  |
| Q99700 | 3KTR | HMDB0000097 | 3.397  |
| P05019 | 1H02 | HMDB0000097 | 3.396  |
| P42858 | 3IO4 | HMDB0000097 | 3.394  |
| P78504 | 2VJ2 | HMDB0000883 | 3.389  |
| O00555 | 3BXK | HMDB0000097 | 3.386  |
| P41159 | 3IIQ | HMDB0000097 | 3.386  |
| Q15303 | 2AHX | HMDB0000097 | 3.385  |
| P22301 | 2ILK | HMDB0000097 | 3.385  |
| P06850 | 1MO1 | HMDB0000097 | 3.384  |
| P51608 | 3C2I | HMDB0000097 | 3.384  |
| P01241 | 1AXI | HMDB0000097 | 3.382  |
| P10912 | 1AXI | HMDB0000097 | 3.382  |
| Q13255 | 1EWT | HMDB0000097 | 3.382  |
| P20783 | 1BND | HMDB0000097 | 3.38   |
| P23560 | 1BND | HMDB0000097 | 3.38   |
| P01920 | 1UVQ | HMDB0000097 | 3.38   |
| Q06787 | 2QND | HMDB0000097 | 3.38   |
| Q13936 | 1T0J | HMDB0000097 | 3.379  |
| P15289 | 2AIJ | HMDB0000097 | 3.376  |
| P55072 | 1Y8E | HMDB0000883 | 3.374  |
| Q5S007 | 3D6T | HMDB0000097 | 3.374  |
| P16220 | 1DH3 | HMDB0000097 | 3.373  |
| P78509 | 2DDU | HMDB0000097 | 3.373  |
| Q14203 | 2HL5 | HMDB0000097 | 3.372  |
| P27487 | 1W1I | HMDB0000097 | 3.367  |
| Q15465 | 3M1N | HMDB0000097 | 3.367  |
| Q8NFD5 | 2EH9 | HMDB0000097 | 3.365  |
| Q9Y2R2 | 2P6X | HMDB0000097 | 3.352  |
| P26358 | 3EPZ | HMDB0000097 | 3.352  |
| P09619 | 1GQ5 | HMDB0000097 | 3.35   |
| Q9UBK2 | 1XB7 | HMDB0000097 | 3.348  |
| Q9NQC3 | 1OZN | HMDB0000097 | 3.346  |
| Q13936 | 1T0J | HMDB0000883 | 3.344  |
| P22301 | 2ILK | HMDB0000883 | 3.341  |
| P05231 | 1ALU | HMDB0000097 | 3.325  |
| O43612 | 1UV0 | HMDB0000097 | 3.323  |
| P55072 | 1Y8E | HMDB0000097 | 3.305  |
| P78504 | 2VJ2 | HMDB0000097 | 3.299  |
| P01116 | 1N4R | HMDB0000159 | 3.291  |
| P28329 | 2FY3 | HMDB0000159 | 3.243  |
| Q08499 | 1MKD | HMDB0000159 | 3.212  |
| P02768 | 1E7A | HMDB0000159 | 3.183  |
| P27338 | 1OJA | HMDB0010384 | 3.183  |
| P36551 | 2AEX | HMDB0000159 | 3.175  |
| P17612 | 3MVJ | HMDB0000159 | 3.145  |
| P01308 | 1EVR | HMDB0000159 | 3.128  |
| P05067 | 2FK3 | HMDB0000097 | 3.0963 |
| P10082 | 2ZA5 | HMDB0000159 | 3.086  |
| Q02750 | 3EQC | HMDB0000159 | 3.085  |
| Q9BYW2 | 3H6L | HMDB0000159 | 3.081  |
| P04278 | 1LHV | HMDB0000159 | 3.077  |

|        |      |             |       |
|--------|------|-------------|-------|
| P02787 | 1DAN | HMDB0000159 | 3.065 |
| P08069 | 3F5P | HMDB0000159 | 3.06  |
| P04271 | 2H61 | HMDB0000159 | 3.036 |
| P05067 | 2FK3 | HMDB0000159 | 3.034 |
| P01270 | 3C4M | HMDB0000159 | 3.031 |
| Q99259 | 2OKJ | HMDB0000159 | 3.028 |
| Q03431 | 3L2J | HMDB0000159 | 3.023 |
| P21964 | 3HVH | HMDB0000159 | 3.017 |
| P02741 | 1CGP | HMDB0000159 | 3.008 |
| Q30201 | 1DEA | HMDB0000159 | 2.996 |
| Q9Y617 | 3E77 | HMDB0000159 | 2.981 |
| Q15067 | 1W07 | HMDB0000159 | 2.959 |
| P28482 | 1PME | HMDB0000159 | 2.957 |
| Q06124 | 2SHP | HMDB0000159 | 2.955 |
| P21802 | 1DJS | HMDB0000159 | 2.946 |
| P14902 | 2D0T | HMDB0000159 | 2.93  |
| P68871 | 1BAB | HMDB0000159 | 2.927 |
| P27361 | 3FXW | HMDB0000159 | 2.903 |
| P51659 | 1IKT | HMDB0000159 | 2.898 |
| P42336 | 3HHM | HMDB0000159 | 2.87  |
| P21359 | 2D4Q | HMDB0000159 | 2.865 |
| P35520 | 1M54 | HMDB0000159 | 2.863 |
| P12821 | 1UZE | HMDB0000159 | 2.859 |
| P14416 | 2HLB | HMDB0000159 | 2.859 |
| P07949 | 2IVS | HMDB0000159 | 2.855 |
| P08397 | 3ECR | HMDB0000159 | 2.847 |
| P15056 | 3II5 | HMDB0000159 | 2.841 |
| P30793 | 1N3T | HMDB0000159 | 2.825 |
| P04049 | 3CU8 | HMDB0000159 | 2.801 |
| Q99497 | 1PDW | HMDB0000159 | 2.797 |
| P01375 | 2AZ5 | HMDB0000159 | 2.775 |
| P54098 | 1AIV | HMDB0000159 | 2.771 |
| P62834 | 3KUC | HMDB0000159 | 2.767 |
| P43354 | 1OVL | HMDB0000159 | 2.755 |
| P01112 | 1NVU | HMDB0000159 | 2.728 |
| P29475 | 1F20 | HMDB0000159 | 2.71  |
| P60484 | 1D5R | HMDB0000159 | 2.701 |
| P42345 | 4FAP | HMDB0000159 | 2.689 |
| Q9Y243 | 2X18 | HMDB0000159 | 2.671 |
| P23771 | 3DFV | HMDB0000159 | 2.669 |
| P06280 | 3HG3 | HMDB0000159 | 2.636 |
| P16435 | 3FJO | HMDB0000159 | 2.61  |
| P16278 | 1BOB | HMDB0000159 | 2.608 |
| P49917 | 3II6 | HMDB0000159 | 2.568 |
| Q8NFD5 | 2EH9 | HMDB0000159 | 2.522 |
| Q16620 | 1HCF | HMDB0000159 | 2.513 |
| P00450 | 2J5W | HMDB0000159 | 2.491 |
| P11362 | 1CVS | HMDB0000159 | 2.469 |
| P21333 | 2WFN | HMDB0000159 | 2.425 |
| Q9UBP0 | 3B9P | HMDB0000159 | 2.415 |
| P00441 | 1HL5 | HMDB0000159 | 2.396 |
| P01127 | 3MJG | HMDB0000159 | 2.395 |
| P55072 | 1Y8E | HMDB0000159 | 2.384 |
| O43612 | 1UV0 | HMDB0000159 | 2.379 |
| Q15303 | 2AHX | HMDB0000159 | 2.375 |
| Q9Y2R2 | 2P6X | HMDB0000159 | 2.374 |
| P22301 | 2ILK | HMDB0000159 | 2.37  |
| Q9UBK2 | 1XB7 | HMDB0000159 | 2.368 |
| P20783 | 1BND | HMDB0000159 | 2.367 |
| P23560 | 1BND | HMDB0000159 | 2.367 |
| Q13255 | 1EWT | HMDB0000159 | 2.366 |
| P01589 | 3IU3 | HMDB0000159 | 2.348 |
| P31749 | 2UZS | HMDB0000159 | 2.347 |
| P09619 | 1GQ5 | HMDB0000159 | 2.346 |
| Q06787 | 2QND | HMDB0000159 | 2.344 |
| Q99700 | 3KTR | HMDB0000159 | 2.344 |
| Q7LG56 | 3HF1 | HMDB0000159 | 2.343 |
| P78504 | 2VJ2 | HMDB0000159 | 2.342 |
| P27986 | 1H9O | HMDB0000159 | 2.341 |

|        |      |             |       |
|--------|------|-------------|-------|
| P04062 | 2NT0 | HMDB0000159 | 2.338 |
| P01241 | 1AXI | HMDB0000159 | 2.337 |
| P10912 | 1AXI | HMDB0000159 | 2.337 |
| P39905 | 2V5E | HMDB0000159 | 2.323 |
| P05019 | 1H02 | HMDB0000159 | 2.317 |
| P26358 | 3EPZ | HMDB0000159 | 2.317 |
| P10145 | 1QE6 | HMDB0000159 | 2.315 |
| O15146 | 2IEP | HMDB0000159 | 2.312 |
| Q15465 | 3M1N | HMDB0000159 | 2.309 |
| P01579 | 1EKU | HMDB0000159 | 2.303 |
| P04637 | 1GZH | HMDB0000159 | 2.296 |
| P01584 | 2NVH | HMDB0000159 | 2.295 |
| Q9NQC3 | 1OZN | HMDB0000159 | 2.292 |
| O00555 | 3BXX | HMDB0000159 | 2.287 |
| P60568 | 1PY2 | HMDB0000159 | 2.266 |
| Q14203 | 2HL5 | HMDB0000159 | 2.262 |
| P35637 | 1G5G | HMDB0000159 | 2.254 |
| P01911 | 2WBJ | HMDB0000159 | 2.254 |
| P15289 | 2AIJ | HMDB0000159 | 2.253 |
| P01920 | 1UVQ | HMDB0000159 | 2.251 |
| Q13936 | 1T0J | HMDB0000159 | 2.25  |
| P08833 | 1ZT3 | HMDB0000159 | 2.249 |
| P42858 | 3IO4 | HMDB0000159 | 2.247 |
| P06850 | 1MO1 | HMDB0000159 | 2.245 |
| Q5S007 | 3D6T | HMDB0000159 | 2.245 |
| P05231 | 1ALU | HMDB0000159 | 2.244 |
| P27487 | 1W1I | HMDB0000159 | 2.242 |
| P51608 | 3C2I | HMDB0000159 | 2.241 |
| Q8NER1 | 2NYJ | HMDB0000159 | 2.233 |
| P11274 | 1K1F | HMDB0000159 | 2.225 |
| P16220 | 1DH3 | HMDB0000159 | 2.207 |
| P01303 | 1R9N | HMDB0000159 | 2.18  |
| P41159 | 3IIQ | HMDB0000159 | 2.166 |
| P78509 | 2DDU | HMDB0000159 | 2.138 |
